# Supplementary material for: RNA profiling of blood platelets noninvasively differentiates colorectal cancer from healthy donors and noncancerous intestinal diseases: a retrospective cohort study
Source: PubMed Central journal article supplement (PMC8889759; doi:10.1186/s13073-022-01033-x), 2022-03-02
Supplement: 13073_2022_1033_MOESM1_ESM.pdf [file 13073_2022_1033_MOESM1_ESM.pdf]

## Additional Figures and Tables

### Content:

|                                                                                                                                                                                                                                     |    |
|-------------------------------------------------------------------------------------------------------------------------------------------------------------------------------------------------------------------------------------|----|
| <b>Fig. S1.</b> Distribution of CEA (left) and CA199 (right) in CRC patients and controls.....                                                                                                                                      | 2  |
| <b>Fig. S2.</b> Representative images of isolated platelets (A) and bioanalyzer curves of platelet RNA (B).....                                                                                                                     | 3  |
| <b>Fig. S3.</b> Gene set enrichment analyses (GSEA) of differentially expressed genes in the blood platelets between patients with polyps or adenoma and healthy donors in hallmark gene sets from Molecular Signatures Database... | 4  |
| <b>Fig. S4.</b> AUROCs of the training set (via repeated sampling) and the validation set at each iteration.....                                                                                                                    | 5  |
| <b>Fig. S5.</b> Heatmap representation of differentially expressed genes in control group versus cancer group.....                                                                                                                  | 6  |
| <b>Table S1.</b> Clinical features.....                                                                                                                                                                                             | 7  |
| <b>Table S2.</b> Alignment metrics.....                                                                                                                                                                                             | 15 |
| <b>Table S3.</b> Genes for classification of CRC patients from controls.....                                                                                                                                                        | 28 |
| <b>Table S4.</b> Genes for classification of CRC patients, healthy donors and patients with noncancerous diseases.....                                                                                                              | 50 |
| <b>Table S5.</b> Predicted probabilities for multiclass classification.....                                                                                                                                                         | 73 |

**Fig. S1 Distribution of CEA (left) and CA199 (right) in CRC patients and controls.**

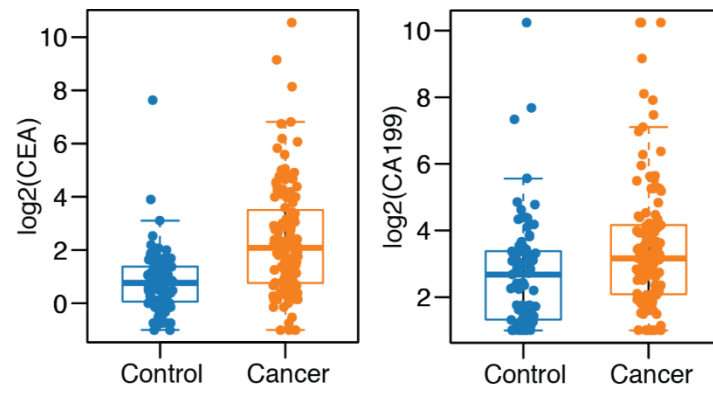

**Fig. S2 Representative images of isolated platelets (A) and bioanalyzer curves of platelet RNA (B).** Scale bars, 200  $\mu\text{m}$ .

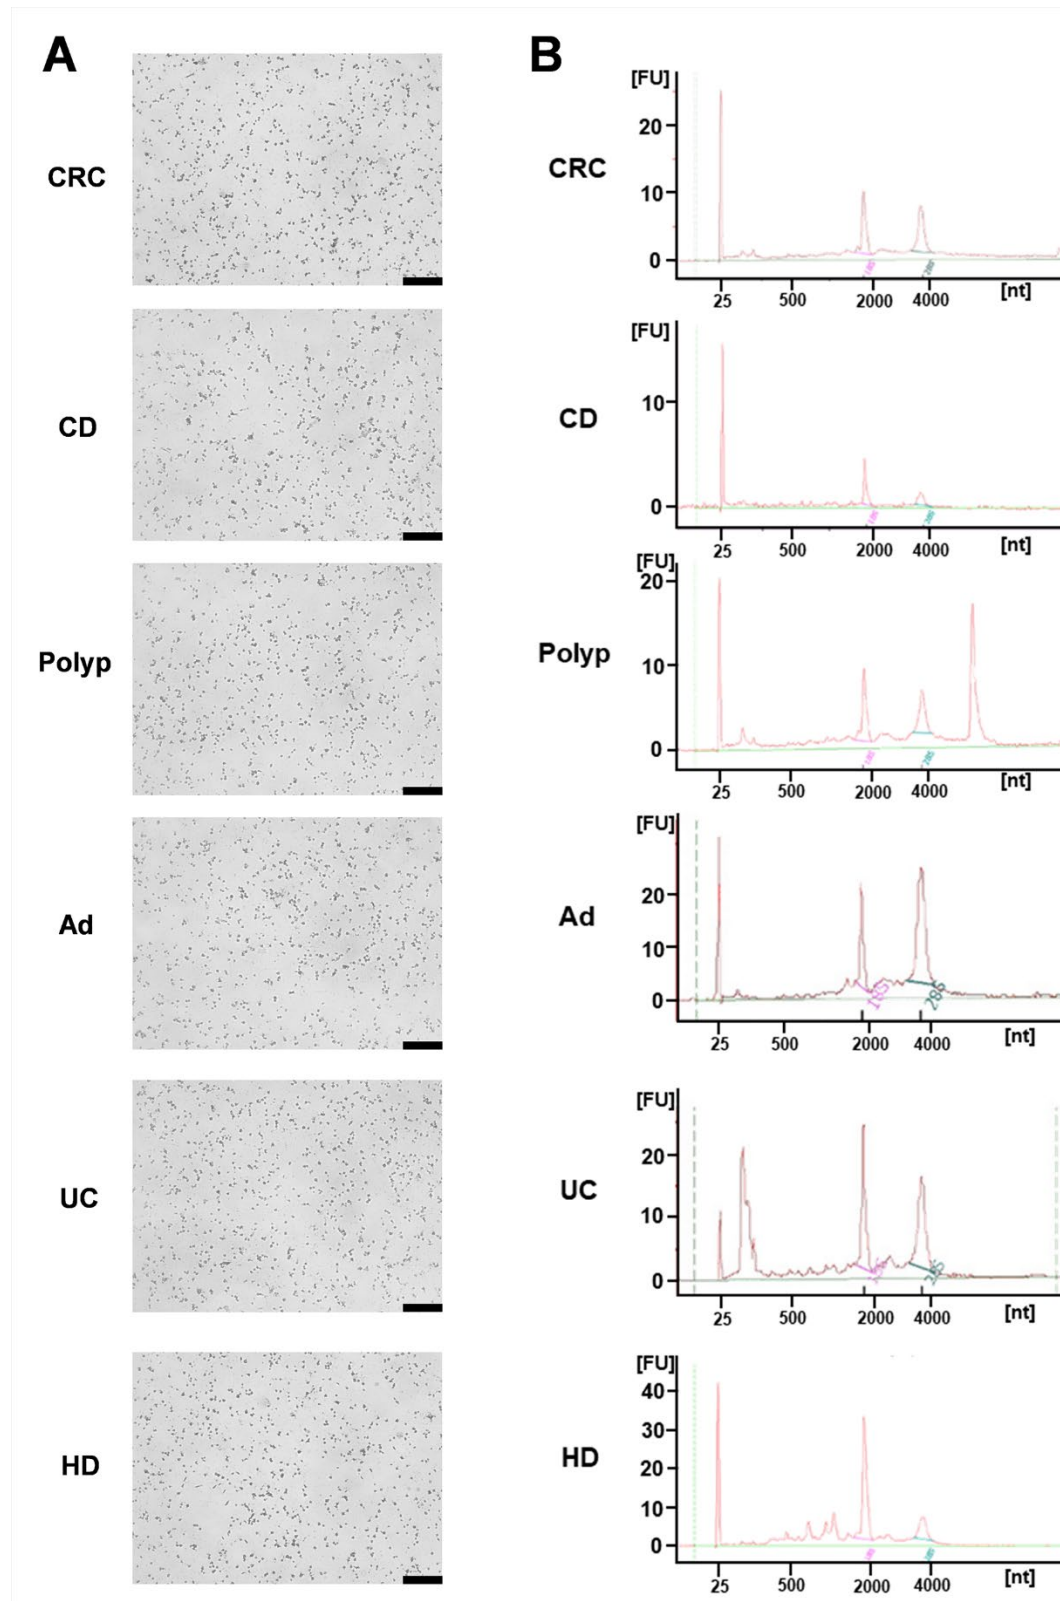

**Fig. S3 Gene set enrichment analyses (GSEA) of differentially expressed genes in the blood platelets between patients with polyps or adenoma and healthy donors in hallmark gene sets from Molecular Signatures Database.**

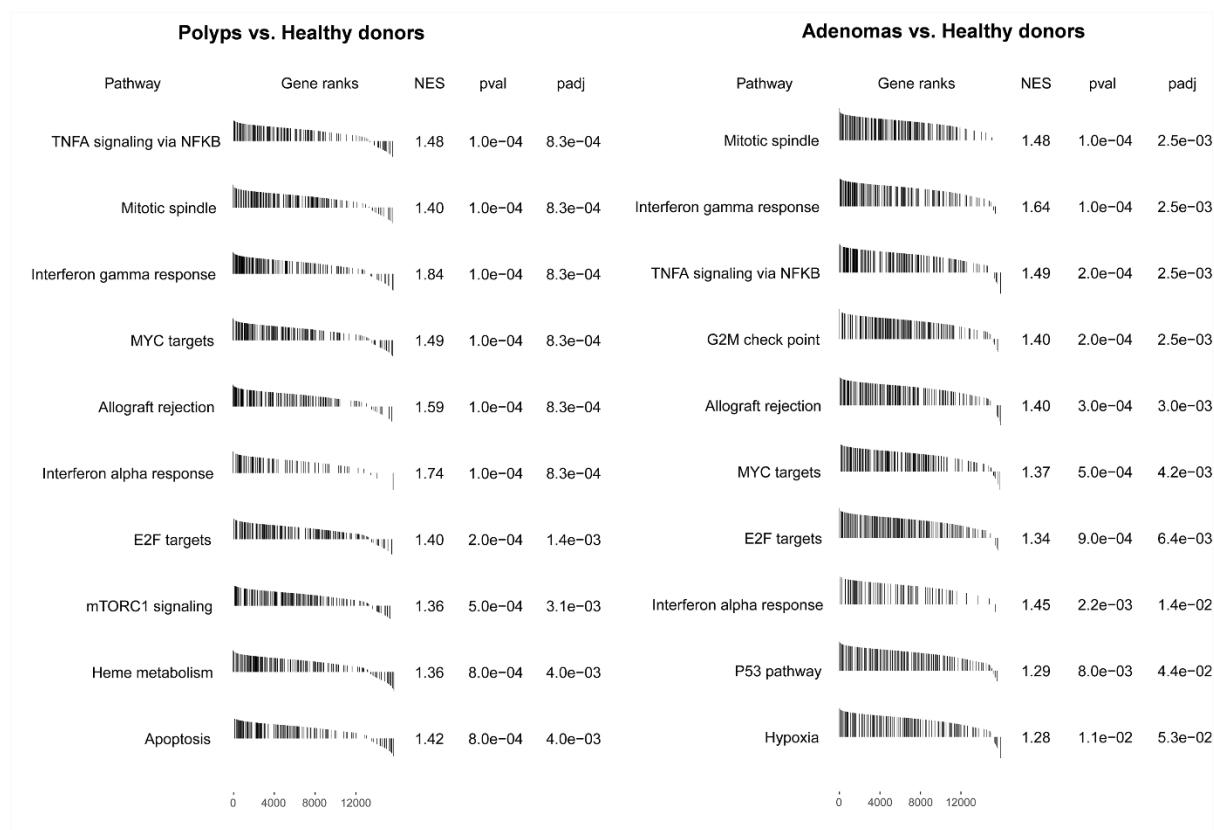

**Fig. S4 AUROCs of the training set (via repeated sampling) and the validation set at each iteration.**

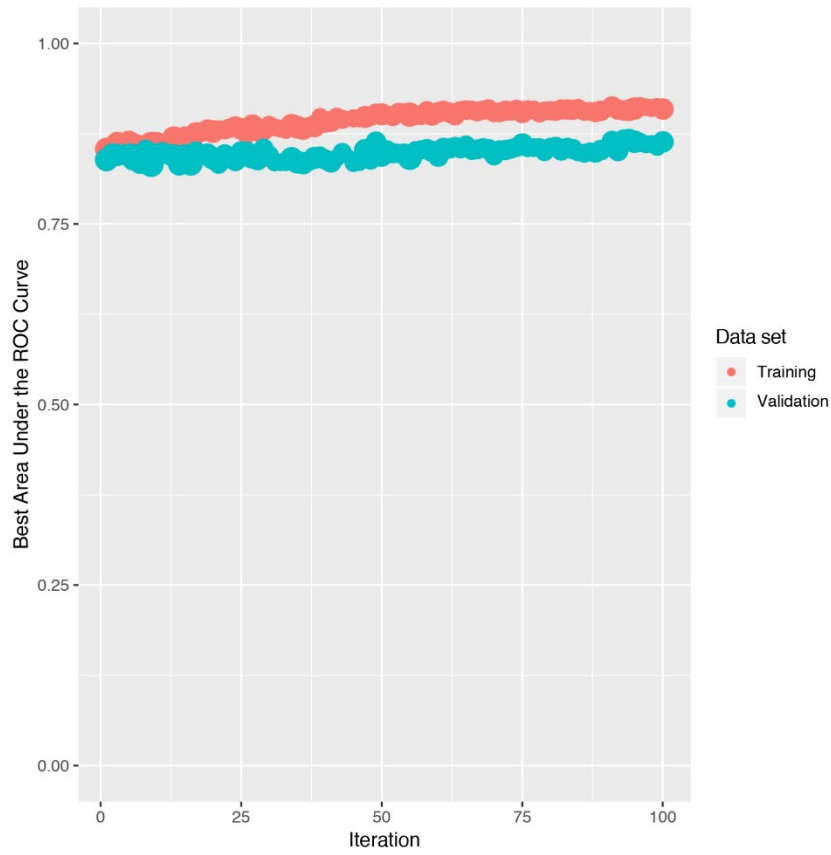

**Fig. S5 Heatmap representation of differentially expressed genes in control group versus cancer group.**

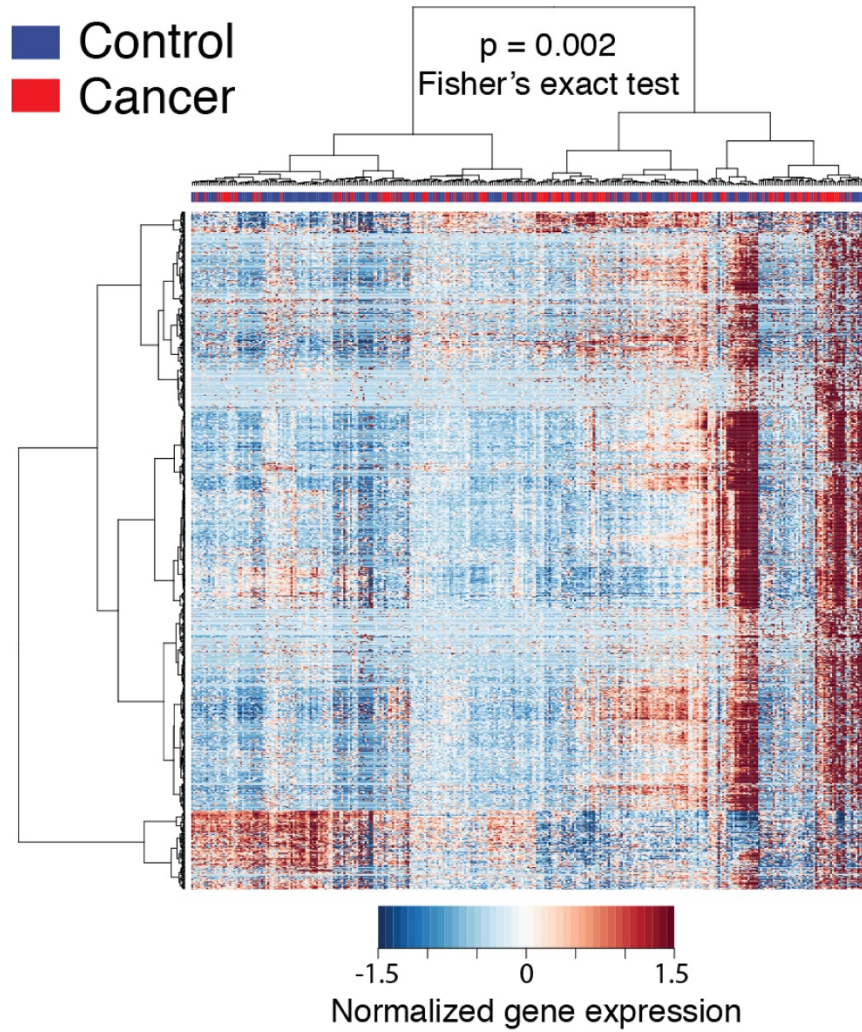

**Table S1. Clinical features.**

| <b>Sample ID</b> | <b>Group</b> | <b>CEA</b> | <b>CA199</b> | <b>Data Set</b> |
|------------------|--------------|------------|--------------|-----------------|
| 1390079A         | ad           | 1.5        | 4.9          | Training        |
| 1511894A         | ad           | NA         | NA           | Validation      |
| 1633021A         | ad           | 5.8        | 206.3        | Training        |
| 1641852A         | ad           | NA         | NA           | Training        |
| 1691282A         | ad           | NA         | NA           | Training        |
| 1706853A         | ad           | 1.3        | 7.1          | Validation      |
| 1750981A         | ad           | 3.2        | 2.1          | Training        |
| 1767539A         | ad           | 3.3        | 7.6          | Training        |
| 1818805A         | ad           | NA         | NA           | Training        |
| 1851168A         | ad           | NA         | NA           | Training        |
| 1853798A         | ad           | 3.7        | 20.1         | Training        |
| 1858985A         | ad           | NA         | NA           | Validation      |
| 1861715A         | ad           | 2          | 5.3          | Training        |
| 1865587A         | ad           | NA         | NA           | Validation      |
| 1865678C         | ad           | 1.4        | 8            | Training        |
| 1865727A         | ad           | NA         | NA           | Validation      |
| 1870332A         | ad           | NA         | NA           | Training        |
| 1875509A         | ad           | 2.5        | 7.3          | Validation      |
| 1878996A         | ad           | NA         | NA           | Validation      |
| 1879308B         | ad           | NA         | NA           | Training        |
| 1883356A         | ad           | NA         | NA           | Validation      |
| 1883708A         | ad           | NA         | NA           | Validation      |
| 1884008A         | ad           | 4.6        | 24.6         | Training        |
| 1884513A         | ad           | NA         | NA           | Validation      |
| 1884881A         | ad           | 1.1        | 8.5          | Training        |
| 1887168A         | ad           | 2.3        | 28.9         | Validation      |
| 1888448A         | ad           | NA         | NA           | Training        |
| 1889952C         | ad           | 4          | 2.6          | Training        |
| 1890001A         | ad           | 3          | 7.3          | Training        |
| 1890188A         | ad           | 3.2        | 11.7         | Training        |
| 1892655C         | ad           | 1.1        | 6.4          | Training        |
| 1894643C         | ad           | NA         | NA           | Training        |
| 1894735C         | ad           | 1          | 14           | Validation      |
| 1894774A         | ad           | 1.8        | 4.7          | Training        |
| 1897415A         | ad           | 14.9       | 18.1         | Validation      |
| 1897444A         | ad           | NA         | NA           | Training        |
| 1898490A         | ad           | NA         | NA           | Validation      |
| 1899157A         | ad           | 0.5        | 2.4          | Validation      |
| 1899623A         | ad           | NA         | NA           | Training        |
| 1899739A         | ad           | 2.7        | 2.3          | Training        |
| 1899845A         | ad           | 3.1        | 8.6          | Validation      |

| <b>Sample ID</b> | <b>Group</b> | <b>CEA</b> | <b>CA199</b> | <b>Data Set</b> |
|------------------|--------------|------------|--------------|-----------------|
| 1905833A         | ad           | 1.8        | 8.4          | Training        |
| 1906132A         | ad           | NA         | NA           | Validation      |
| 1906614A         | ad           | NA         | NA           | Training        |
| 1908768A         | ad           | 1.9        | 9.9          | Validation      |
| 1913593A         | ad           | 0.7        | 2.8          | Training        |
| 1914065A         | ad           | 1.1        | 8.4          | Validation      |
| 1915169A         | ad           | 1.4        | 17.1         | Training        |
| 1916287A         | ad           | NA         | NA           | Training        |
| 1923328A         | ad           | 1.4        | 4.8          | Validation      |
| 1923483A         | ad           | NA         | NA           | Training        |
| 1923712A         | ad           | 1          | 3.3          | Validation      |
| 1923760A         | ad           | NA         | NA           | Training        |
| 1928232A         | ad           | 0.9        | 2.5          | Training        |
| 1930827A         | ad           | 1.7        | 3.4          | Validation      |
| 3-19-1435611A    | ad           | 1.9        | 2.2          | Training        |
| 3-31-1930444A    | ad           | 1.2        | 3.3          | Training        |
| 4-10-1932654A    | ad           | 2.6        | 2            | Validation      |
| 4-8-1932227A     | ad           | NA         | NA           | Training        |
| 1437597A         | crohn        | NA         | NA           | Training        |
| 1510333A         | crohn        | NA         | NA           | Validation      |
| 1678848A         | crohn        | 2.1        | 5.4          | Validation      |
| 1697790A         | crohn        | 1.6        | 5.3          | Training        |
| 1737566C         | crohn        | NA         | NA           | Training        |
| 1740111A         | crohn        | NA         | NA           | Validation      |
| 1743552A         | crohn        | NA         | NA           | Training        |
| 1743786A         | crohn        | NA         | NA           | Training        |
| 1773040A         | crohn        | NA         | NA           | Training        |
| 1784113C         | crohn        | NA         | NA           | Training        |
| 1784113          | crohn        | NA         | NA           | Validation      |
| 1787667A         | crohn        | NA         | NA           | Training        |
| 1799829A         | crohn        | NA         | NA           | Training        |
| 1805451A         | crohn        | NA         | NA           | Validation      |
| 1808689A         | crohn        | NA         | NA           | Validation      |
| 1810051A         | crohn        | NA         | NA           | Validation      |
| 1817230A         | crohn        | NA         | NA           | Training        |
| 1822008A         | crohn        | NA         | NA           | Training        |
| 1831458A         | crohn        | NA         | NA           | Training        |
| 1849492A1        | crohn        | NA         | NA           | Validation      |
| 1849492A         | crohn        | NA         | NA           | Validation      |
| 1849694C         | crohn        | NA         | NA           | Validation      |
| 1857272A         | crohn        | 1.2        | 2.8          | Validation      |
| 1858555A         | crohn        | NA         | NA           | Validation      |



| <b>Sample ID</b> | <b>Group</b> | <b>CEA</b> | <b>CA199</b> | <b>Data Set</b> |
|------------------|--------------|------------|--------------|-----------------|
| 1865617A         | crohn        | 0.8        | 2            | Training        |
| 1865617C         | crohn        | 0.8        | 2            | Training        |
| 1869841B         | crohn        | NA         | NA           | Validation      |
| 1870205A         | crohn        | 4.2        | 47.1         | Training        |
| 1871427C         | crohn        | NA         | NA           | Training        |
| 1871480A         | crohn        | NA         | NA           | Validation      |
| 1874505A         | crohn        | 1.5        | 8.4          | Validation      |
| 1881219A         | crohn        | 1          | 3.4          | Training        |
| 1881790A1        | crohn        | 0.6        | 9.9          | Training        |
| 1881790A         | crohn        | 0.6        | 9.9          | Training        |
| 1884678A         | crohn        | NA         | NA           | Training        |
| 1886485A         | crohn        | 0.9        | 4.6          | Validation      |
| 1899597A         | crohn        | NA         | NA           | Training        |
| 1911217A         | crohn        | NA         | NA           | Training        |
| 1911731A         | crohn        | 0.6        | 21           | Training        |
| 1920204A         | crohn        | NA         | NA           | Training        |
| 1706470342A      | hd           | NA         | NA           | Validation      |
| 1706528242A      | hd           | NA         | NA           | Training        |
| 1706560342A      | hd           | NA         | NA           | Training        |
| 1897700A         | hd           | 8.6        | 1200         | Training        |
| 20180613-1A      | hd           | NA         | NA           | Training        |
| 20180613-3A      | hd           | NA         | NA           | Training        |
| 20180614-7A      | hd           | NA         | NA           | Training        |
| 20180614-9A      | hd           | NA         | NA           | Validation      |
| 20180619-12A     | hd           | NA         | NA           | Validation      |
| 20180619-8A      | hd           | NA         | NA           | Training        |
| 20180621-11A     | hd           | NA         | NA           | Training        |
| 20180621-16A     | hd           | NA         | NA           | Training        |
| 20180621-17A     | hd           | NA         | NA           | Training        |
| 20180621-18A     | hd           | NA         | NA           | Training        |
| 20180621-1A      | hd           | NA         | NA           | Training        |
| 20180621-20A     | hd           | NA         | NA           | Training        |
| 20180621-3A      | hd           | NA         | NA           | Training        |
| 20180621-4A      | hd           | NA         | NA           | Training        |
| 20180621-7A      | hd           | NA         | NA           | Training        |
| 20180621-8A      | hd           | NA         | NA           | Training        |
| 20180621-9A      | hd           | NA         | NA           | Validation      |
| 1521742A         | polyp        | NA         | NA           | Validation      |
| 1565660A         | polyp        | 1.9        | 8.8          | Training        |
| 1588154A         | polyp        | NA         | NA           | Training        |
| 1631136A         | polyp        | NA         | NA           | Training        |
| 1653398C         | polyp        | 0.6        | 10.1         | Training        |

| <b>Sample ID</b> | <b>Group</b> | <b>CEA</b> | <b>CA199</b> | <b>Data Set</b> |
|------------------|--------------|------------|--------------|-----------------|
| 1673045A         | polyp        | NA         | NA           | Training        |
| 1708311A         | polyp        | 2.8        | 2.5          | Training        |
| 1720296A         | polyp        | 1          | 10.5         | Training        |
| 1726513A         | polyp        | 3.3        | 10.4         | Validation      |
| 1745061A         | polyp        | 2.6        | 9.3          | Training        |
| 1746400A         | polyp        | NA         | NA           | Training        |
| 1759160A         | polyp        | 1.8        | 2            | Validation      |
| 1762308A         | polyp        | NA         | NA           | Training        |
| 1769697A         | polyp        | NA         | NA           | Training        |
| 1829253A         | polyp        | NA         | NA           | Training        |
| 1831610A         | polyp        | 3.5        | 11.4         | Validation      |
| 1859699A         | polyp        | 2.8        | 12.6         | Training        |
| 1880378B         | polyp        | NA         | NA           | Validation      |
| 1881428B         | polyp        | 1.2        | 2.3          | Training        |
| 1886064A         | polyp        | 2.1        | 2            | Validation      |
| 1888951A         | polyp        | NA         | NA           | Training        |
| 1889526A         | polyp        | NA         | NA           | Validation      |
| 1889576A         | polyp        | 2.2        | 7.4          | Training        |
| 1890357A         | polyp        | 0.9        | 2            | Training        |
| 1891753C         | polyp        | 2.1        | 160.5        | Validation      |
| 1893988A         | polyp        | NA         | NA           | Validation      |
| 1894005C         | polyp        | NA         | NA           | Training        |
| 1894926C         | polyp        | NA         | NA           | Training        |
| 1894946A         | polyp        | NA         | NA           | Training        |
| 1899012A         | polyp        | 2.4        | 10.8         | Training        |
| 1899447A         | polyp        | NA         | NA           | Training        |
| 1901282A         | polyp        | NA         | NA           | Training        |
| 1901448A         | polyp        | NA         | NA           | Validation      |
| 1904971A         | polyp        | 1.9        | 2.3          | Validation      |
| 1905067A         | polyp        | 2.1        | 27.3         | Validation      |
| 1905138A         | polyp        | 1.5        | 2            | Validation      |
| 1905350A         | polyp        | 0.8        | 6.6          | Training        |
| 1906391A         | polyp        | 0.6        | 2.2          | Training        |
| 1908348A         | polyp        | 2.4        | 3.1          | Training        |
| 1908351A         | polyp        | 0.9        | 14.4         | Training        |
| 1908612A         | polyp        | NA         | NA           | Training        |
| 1909623A         | polyp        | 1.4        | 9.6          | Validation      |
| 1917945A         | polyp        | 3.7        | 2            | Training        |
| 1923420A         | polyp        | 1.6        | 2.7          | Validation      |
| 1926306A         | polyp        | 2          | 2            | Validation      |
| 1928274A         | polyp        | NA         | NA           | Training        |
| 8125630A         | polyp        | 0.5        | 6.9          | Validation      |

| <b>Sample ID</b> | <b>Group</b> | <b>CEA</b> | <b>CA199</b> | <b>Data Set</b> |
|------------------|--------------|------------|--------------|-----------------|
| 8134785C         | polyp        | 1.84       | 2.8          | Training        |
| 1838221C         | stage1       | 1.6        | 3.6          | Validation      |
| 1840338A         | stage1       | NA         | NA           | Training        |
| 1841812A         | stage1       | 26.3       | 28.6         | Training        |
| 1846752A         | stage1       | 47.8       | 176.8        | Training        |
| 1853560A         | stage1       | 1.1        | 3.7          | Validation      |
| 1864082A         | stage1       | 1.3        | 77.7         | Validation      |
| 1874533A         | stage1       | 0.9        | 2            | Training        |
| 1877908C         | stage1       | 22.2       | 2            | Validation      |
| 1884726A         | stage1       | 3.4        | 9.7          | Training        |
| 1886703A         | stage1       | 1.3        | 4.3          | Validation      |
| 1887041A         | stage1       | 2.8        | 2            | Training        |
| 1891008C         | stage1       | 0.7        | 6            | Training        |
| 1892326C         | stage1       | 1.4        | 8.1          | Validation      |
| 1892923C         | stage1       | 3.5        | 2            | Training        |
| 1894753A         | stage1       | 1.6        | 2            | Training        |
| 1897877A         | stage1       | 16.7       | 82.5         | Training        |
| 1898496A         | stage1       | 1.2        | 5.7          | Validation      |
| 1902979A         | stage1       | NA         | NA           | Training        |
| 1904061A         | stage1       | 1.3        | 23           | Training        |
| 1905577A         | stage1       | 1.1        | 7.9          | Validation      |
| 1906588A         | stage1       | NA         | NA           | Validation      |
| 1907444A         | stage1       | NA         | NA           | Validation      |
| 1910771A         | stage1       | 7.3        | 14           | Training        |
| 1925846A         | stage1       | 3.6        | 6.3          | Training        |
| 4-2-1922690A     | stage1       | NA         | NA           | Training        |
| 1279536A         | stage2       | 1.2        | 4.8          | Training        |
| 1352617A         | stage2       | 5.1        | 15.5         | Validation      |
| 1561766A         | stage2       | 3.2        | 12.6         | Training        |
| 1654825A         | stage2       | 6.4        | 4.2          | Training        |
| 1824723A         | stage2       | 0.6        | 16.5         | Training        |
| 1830154A         | stage2       | 107        | 574.2        | Training        |
| 1860979A         | stage2       | 56.8       | 20.1         | Training        |
| 1864179A         | stage2       | 5.2        | 3.2          | Validation      |
| 1871082A         | stage2       | 1.2        | 3.9          | Validation      |
| 1876394B         | stage2       | 4.4        | 17.8         | Training        |
| 1880231B         | stage2       | 2.2        | 18.7         | Validation      |
| 1880284B         | stage2       | 6.8        | 50.1         | Training        |
| 1881406A         | stage2       | 4.6        | 3.5          | Training        |
| 1883814A         | stage2       | 2.6        | 6.7          | Validation      |
| 1884478A         | stage2       | 9.2        | 21.5         | Validation      |
| 1885869A         | stage2       | 17         | 61.8         | Training        |

| <b>Sample ID</b> | <b>Group</b> | <b>CEA</b> | <b>CA199</b> | <b>Data Set</b> |
|------------------|--------------|------------|--------------|-----------------|
| 1886923A         | stage2       | 7.6        | 2            | Training        |
| 1887311A         | stage2       | 1.1        | 16.9         | Training        |
| 1888087A         | stage2       | 3          | 8.9          | Training        |
| 1888328A         | stage2       | 8          | 5.1          | Validation      |
| 1889737A         | stage2       | 0.9        | 2            | Validation      |
| 1896461C         | stage2       | 7.6        | 6.8          | Validation      |
| 1897393A         | stage2       | 27.2       | 6.1          | Validation      |
| 1897847A         | stage2       | 568.7      | 275          | Training        |
| 1898529A         | stage2       | 6.7        | 18.5         | Training        |
| 1900924A         | stage2       | 0.5        | 3            | Training        |
| 1904585A         | stage2       | 19.5       | 3.8          | Training        |
| 1904904A         | stage2       | 2.2        | 3            | Training        |
| 1905470A         | stage2       | NA         | NA           | Validation      |
| 1905977A         | stage2       | 1.2        | 21           | Training        |
| 1913516A         | stage2       | 1.4        | 3.5          | Training        |
| 1918957A         | stage2       | 7.1        | 22.1         | Validation      |
| 1923555A         | stage2       | 1.2        | 6.5          | Training        |
| 1924049A         | stage2       | 0.5        | 49.5         | Training        |
| 1924478A         | stage2       | 9.3        | 17.4         | Validation      |
| 1925252A         | stage2       | 5.1        | 3.4          | Training        |
| 1926272A         | stage2       | 33.5       | 2            | Validation      |
| 1927301A         | stage2       | 1.2        | 4.2          | Training        |
| 1928219A         | stage2       | 2.1        | 10.9         | Validation      |
| 1929671A         | stage2       | 1.1        | 6.8          | Training        |
| 1932301A         | stage2       | 283.8      | 40           | Validation      |
| 1941919          | stage2       | 2.6        | 12.3         | Training        |
| 4-3-1927708A     | stage2       | 25.2       | 8            | Validation      |
| 8128721A         | stage2       | 2.2        | 15.9         | Training        |
| 8131850A         | stage2       | 4.7        | 7            | Training        |
| 8133808A         | stage2       | 3.94       | 11.1         | Training        |
| 8133904A         | stage2       | NA         | NA           | Training        |
| 8134049A         | stage2       | 15.98      | 4.2          | Validation      |
| 1486870A         | stage3       | 7.6        | 5.1          | Training        |
| 1758810A         | stage3       | 1.7        | 6.6          | Training        |
| 1776331A         | stage3       | 1.7        | 2.8          | Training        |
| 1835320A         | stage3       | 112.6      | 137.1        | Validation      |
| 1843877A         | stage3       | 1.3        | 4.5          | Training        |
| 1860881A         | stage3       | 3.7        | 16.1         | Training        |
| 1864085A         | stage3       | 10.8       | 15.2         | Validation      |
| 1867295A         | stage3       | 3.9        | 2            | Validation      |
| 1867559A         | stage3       | 2.9        | 10.8         | Training        |
| 1870541A         | stage3       | 5.3        | 8.8          | Training        |

| <b>Sample ID</b> | <b>Group</b> | <b>CEA</b> | <b>CA199</b> | <b>Data Set</b> |
|------------------|--------------|------------|--------------|-----------------|
| 1870933A         | stage3       | 2.4        | 6.7          | Training        |
| 1872105A         | stage3       | 27.3       | 45.1         | Training        |
| 1873326C         | stage3       | 8.3        | 6.7          | Training        |
| 1874019A         | stage3       | 1.7        | 2.8          | Training        |
| 1878930A         | stage3       | 5.1        | 7.9          | Training        |
| 1878930B         | stage3       | 5.1        | 7.9          | Validation      |
| 1880678A         | stage3       | 1.9        | 9.8          | Training        |
| 1880678B         | stage3       | 1.9        | 9.8          | Validation      |
| 1883324B         | stage3       | 1          | 6.6          | Training        |
| 1883327B         | stage3       | 73.1       | 38.1         | Training        |
| 1883444B         | stage3       | 4.4        | 9.7          | Training        |
| 1886737A         | stage3       | 1.7        | 8.7          | Training        |
| 1887113A         | stage3       | 15.8       | 1200         | Training        |
| 1888419A         | stage3       | 1.6        | 12.4         | Training        |
| 1889293          | stage3       | 20.9       | 10.1         | Training        |
| 1890150A         | stage3       | 9.1        | 2            | Training        |
| 1890561A         | stage3       | 23.3       | 124.4        | Validation      |
| 1893061C         | stage3       | 5.3        | 38.2         | Validation      |
| 1893507A         | stage3       | 2.4        | 18           | Training        |
| 1894272C         | stage3       | 10.3       | 36.5         | Validation      |
| 1894880A         | stage3       | 29.1       | 1200         | Training        |
| 1895869C         | stage3       | 15.9       | 11           | Training        |
| 1898696A         | stage3       | 13.8       | 10.6         | Training        |
| 1898763A         | stage3       | 25.5       | 2            | Validation      |
| 1898813A         | stage3       | 18.3       | 2.2          | Validation      |
| 1899032A         | stage3       | 3.2        | 12.6         | Validation      |
| 1899554A         | stage3       | 2.7        | 11.8         | Validation      |
| 1902019A         | stage3       | 4.8        | 240.7        | Training        |
| 1904783A         | stage3       | 7.9        | 9            | Validation      |
| 1904949A         | stage3       | 67.2       | 9.2          | Training        |
| 1905402A         | stage3       | NA         | NA           | Validation      |
| 1910156A         | stage3       | 1.5        | 3.8          | Training        |
| 1911215A         | stage3       | 1.8        | 2.9          | Validation      |
| 1911352A         | stage3       | 6          | 11.1         | Training        |
| 1912491A         | stage3       | 4.1        | 15.3         | Validation      |
| 1915523A         | stage3       | 19.2       | 38.3         | Training        |
| 1915766A         | stage3       | 7.1        | 46.6         | Validation      |
| 1926132A         | stage3       | 32.1       | 1200         | Training        |
| 1928455A         | stage3       | 1.8        | 4.5          | Validation      |
| 1929976A         | stage3       | 4.4        | 7.1          | Validation      |
| 1940746A         | stage3       | 3.1        | 2            | Validation      |
| 1947162          | stage3       | 29.9       | 2            | Validation      |

| <b>Sample ID</b> | <b>Group</b> | <b>CEA</b> | <b>CA199</b> | <b>Data Set</b> |
|------------------|--------------|------------|--------------|-----------------|
| 8128463A         | stage3       | 2.18       | 17.4         | Training        |
| 8129174A         | stage3       | 2.4        | 6.8          | Training        |
| 8132228A         | stage3       | 2.29       | 14.4         | Training        |
| 8133283A         | stage3       | 0.5        | 6.8          | Validation      |
| 8135483A         | stage3       | 1.2        | 5.7          | Validation      |
| 8136591A         | stage3       | 11.97      | 10.9         | Validation      |
| 1908698A         | stage4       | 1500       | 1200         | Training        |
| 1386860A         | uc           | NA         | NA           | Training        |
| 1488213A         | uc           | 1.1        | NA           | Validation      |
| 1496601A         | uc           | NA         | 20.7         | Training        |
| 1558998-A        | uc           | NA         | NA           | Training        |
| 1763793A         | uc           | 1.1        | NA           | Training        |
| 1765515A         | uc           | 1.7        | 2            | Validation      |
| 1771180          | uc           | NA         | NA           | Training        |
| 1837489A         | uc           | NA         | NA           | Training        |
| 1844917B         | uc           | NA         | NA           | Validation      |
| 1858491A         | uc           | 0.9        | 2            | Training        |
| 1865925A         | uc           | 0.6        | 5.1          | Validation      |
| 1887010A         | uc           | NA         | NA           | Training        |
| 1890841A         | uc           | 2.3        | 10.4         | Validation      |
| 1892481C         | uc           | 1.4        | 20.6         | Training        |
| 1893092C         | uc           | 0.7        | 3.4          | Validation      |
| 1894201C         | uc           | NA         | NA           | Training        |
| 1895926A         | uc           | 198.2      | 2            | Validation      |
| 1897570A         | uc           | NA         | NA           | Validation      |
| 1902831A         | uc           | 1.4        | 2            | Training        |
| 1911263A         | uc           | NA         | NA           | Training        |
| 1911496A         | uc           | 3.2        | 3.3          | Training        |
| 1921957A         | uc           | 2.9        | NA           | Training        |

**Table S2. Alignment metrics.**

| Sample ID   | Number of input reads | Uniquely mapped reads number | Uniquely mapped reads % | Average mapped length | Number of splices: Total | Number of splices: Annotated (sjdb) | Number of splices: GT/AG | Number of splices: GC/AG | Number of splices: AT/AC | Number of splices: Non-canonical | Mismatch rate per base, % |
|-------------|-----------------------|------------------------------|-------------------------|-----------------------|--------------------------|-------------------------------------|--------------------------|--------------------------|--------------------------|----------------------------------|---------------------------|
| 1279536A    | 60384187              | 51818300                     | 85.81%                  | 198.05                | 14810367                 | 14020198                            | 14468170                 | 102292                   | 9172                     | 230733                           | 0.44%                     |
| 1352617A    | 52315249              | 41822921                     | 79.94%                  | 198.1                 | 17675800                 | 16881406                            | 17368566                 | 106800                   | 11093                    | 189341                           | 0.39%                     |
| 1386860A    | 60823724              | 48466995                     | 79.68%                  | 197.97                | 5158681                  | 4370408                             | 4565624                  | 55370                    | 5649                     | 532038                           | 0.58%                     |
| 1390079A    | 50483431              | 40691365                     | 80.60%                  | 197.78                | 16158485                 | 15478626                            | 15852748                 | 98210                    | 10320                    | 197207                           | 0.44%                     |
| 1437597A    | 55511689              | 49190182                     | 88.61%                  | 197.57                | 20607967                 | 19483821                            | 19996425                 | 147795                   | 13701                    | 450046                           | 0.41%                     |
| 1486870A    | 50205476              | 43211425                     | 86.07%                  | 197.82                | 20053319                 | 19205854                            | 19631536                 | 122876                   | 11126                    | 287781                           | 0.39%                     |
| 1488213A    | 55235657              | 43105912                     | 78.04%                  | 196.92                | 17860083                 | 16943931                            | 17323199                 | 130898                   | 13474                    | 392512                           | 0.43%                     |
| 1496601A    | 56006574              | 43583561                     | 77.82%                  | 196.48                | 16155780                 | 15034233                            | 15503268                 | 130891                   | 12291                    | 509330                           | 0.77%                     |
| 1510333A    | 49339271              | 43390696                     | 87.94%                  | 198.38                | 9674884                  | 9048748                             | 9248109                  | 79401                    | 7665                     | 339709                           | 0.42%                     |
| 1511894A    | 51659946              | 45057109                     | 87.22%                  | 197.89                | 17536726                 | 16685585                            | 17190500                 | 104120                   | 10547                    | 231559                           | 0.39%                     |
| 1521742A    | 60084867              | 50364650                     | 83.82%                  | 198.28                | 15561288                 | 14791788                            | 15159262                 | 97325                    | 9372                     | 295329                           | 0.50%                     |
| 1558998-A   | 24967904              | 22101434                     | 88.52%                  | 198.2                 | 2925494                  | 2687956                             | 2791200                  | 23085                    | 2467                     | 108742                           | 0.60%                     |
| 1561766A    | 55091165              | 38763038                     | 70.36%                  | 196.27                | 14535102                 | 13584621                            | 13949704                 | 96189                    | 9355                     | 479854                           | 0.48%                     |
| 1565660A    | 55621767              | 45773482                     | 82.29%                  | 196.72                | 16360971                 | 15177201                            | 15746382                 | 127192                   | 11252                    | 476145                           | 0.53%                     |
| 1588154A    | 55301408              | 48912488                     | 88.45%                  | 197.91                | 11026252                 | 10300264                            | 10693806                 | 83156                    | 7565                     | 241725                           | 0.40%                     |
| 1631136A    | 55496852              | 48968040                     | 88.24%                  | 197.9                 | 14066393                 | 12961989                            | 13541868                 | 116338                   | 13599                    | 394588                           | 0.47%                     |
| 1633021A    | 55617431              | 47286145                     | 85.02%                  | 196.77                | 19999610                 | 18832372                            | 19393576                 | 138456                   | 13642                    | 453936                           | 0.51%                     |
| 1641852A    | 55287545              | 48419448                     | 87.58%                  | 197.95                | 13424982                 | 12642207                            | 13091104                 | 93466                    | 6846                     | 233566                           | 0.51%                     |
| 1653398C    | 50435945              | 41343357                     | 81.97%                  | 197.55                | 13133132                 | 12405917                            | 12792862                 | 84149                    | 9132                     | 246989                           | 0.72%                     |
| 1654825A    | 55269027              | 46946431                     | 84.94%                  | 198.06                | 23002372                 | 22079220                            | 22417938                 | 162697                   | 16794                    | 404943                           | 0.40%                     |
| 1673045A    | 51942115              | 45649778                     | 87.89%                  | 198                   | 21259109                 | 20363034                            | 20787825                 | 137173                   | 14086                    | 320025                           | 0.51%                     |
| 1678848A    | 51130138              | 43330589                     | 84.75%                  | 197.84                | 17906604                 | 17119713                            | 17567279                 | 106666                   | 11216                    | 221443                           | 0.36%                     |
| 1691282A    | 20030176              | 11908326                     | 59.45%                  | 197.02                | 1138058                  | 736273                              | 821524                   | 11364                    | 1258                     | 303912                           | 0.75%                     |
| 1697790A    | 48987716              | 33299633                     | 67.98%                  | 196.65                | 12088823                 | 11350208                            | 11614805                 | 83604                    | 7286                     | 383128                           | 0.45%                     |
| 1706470342A | 55072844              | 38642074                     | 70.17%                  | 196.72                | 13552605                 | 12864847                            | 13233247                 | 91104                    | 8745                     | 219509                           | 0.44%                     |

| Sample ID   | Number of input reads | Uniquely mapped reads number | Uniquely mapped reads % | Average mapped length | Number of splices: Total | Number of splices: Annotated (sjdb) | Number of splices: GT/AG | Number of splices: GC/AG | Number of splices: AT/AC | Number of splices: Non-canonical | Mismatch rate per base, % |
|-------------|-----------------------|------------------------------|-------------------------|-----------------------|--------------------------|-------------------------------------|--------------------------|--------------------------|--------------------------|----------------------------------|---------------------------|
| 1706528242A | 55374796              | 29745142                     | 53.72%                  | 196.24                | 12760079                 | 12043850                            | 12408919                 | 78256                    | 8550                     | 264354                           | 0.47%                     |
| 1706560342A | 55312787              | 30643428                     | 55.40%                  | 196.68                | 9578923                  | 9015517                             | 9267782                  | 64041                    | 5895                     | 241205                           | 0.50%                     |
| 1706853A    | 54961707              | 45434046                     | 82.66%                  | 197.69                | 16005854                 | 15113544                            | 15517914                 | 116972                   | 11370                    | 359598                           | 0.43%                     |
| 1708311A    | 51867165              | 41878851                     | 80.74%                  | 197.45                | 18652578                 | 17714146                            | 18150272                 | 134411                   | 13111                    | 354784                           | 0.50%                     |
| 1720296A    | 55589442              | 45110980                     | 81.15%                  | 198.05                | 18134467                 | 17324126                            | 17751381                 | 112785                   | 10036                    | 260265                           | 0.49%                     |
| 1726513A    | 76124049              | 49459279                     | 64.97%                  | 197.09                | 16724314                 | 15661164                            | 16134836                 | 118808                   | 11257                    | 459413                           | 0.38%                     |
| 1737566C    | 50568075              | 42371512                     | 83.79%                  | 198.09                | 15841005                 | 15174082                            | 15504921                 | 103971                   | 10774                    | 221339                           | 0.44%                     |
| 1740111A    | 27920224              | 24145555                     | 86.48%                  | 198.28                | 4572748                  | 4220399                             | 4351769                  | 38201                    | 3452                     | 179326                           | 0.50%                     |
| 1743552A    | 56783729              | 39919901                     | 70.30%                  | 196.83                | 13617139                 | 12539744                            | 12915372                 | 102316                   | 9577                     | 589874                           | 0.45%                     |
| 1743786A    | 78516049              | 59088646                     | 75.26%                  | 197.14                | 19538900                 | 18223810                            | 18831232                 | 149966                   | 13128                    | 544574                           | 0.38%                     |
| 1745061A    | 55427110              | 40663571                     | 73.36%                  | 198.59                | 12936625                 | 12349698                            | 12664455                 | 85713                    | 8827                     | 177630                           | 0.43%                     |
| 1746400A    | 55573926              | 47950959                     | 86.28%                  | 198.02                | 15499328                 | 14628780                            | 15035948                 | 111700                   | 10822                    | 340858                           | 0.43%                     |
| 1750981A    | 55684652              | 47659026                     | 85.59%                  | 198.16                | 16500007                 | 15836830                            | 16203483                 | 96891                    | 9822                     | 189811                           | 0.54%                     |
| 1758810A    | 28245237              | 23410783                     | 82.88%                  | 197.35                | 6407039                  | 5976108                             | 6164378                  | 49214                    | 5407                     | 188040                           | 0.50%                     |
| 1759160A    | 68062373              | 38559312                     | 56.65%                  | 196.57                | 10304787                 | 9529334                             | 9869494                  | 91677                    | 7064                     | 336552                           | 0.56%                     |
| 1762308A    | 55442246              | 42074245                     | 75.89%                  | 196.87                | 15498815                 | 14561472                            | 14915535                 | 104445                   | 10513                    | 468322                           | 0.46%                     |
| 1763793A    | 55409268              | 44944998                     | 81.11%                  | 197.38                | 21596277                 | 20382825                            | 20758507                 | 168917                   | 15608                    | 653245                           | 0.41%                     |
| 1765515A    | 74636156              | 56736482                     | 76.02%                  | 197.53                | 10046594                 | 8598893                             | 8924145                  | 122828                   | 9712                     | 989909                           | 0.46%                     |
| 1767539A    | 60363156              | 50237891                     | 83.23%                  | 197.69                | 15985420                 | 15055084                            | 15530776                 | 113291                   | 11429                    | 329924                           | 0.49%                     |
| 1769697A    | 50045681              | 36589176                     | 73.11%                  | 198.55                | 13445266                 | 12885979                            | 13188717                 | 82724                    | 8198                     | 165627                           | 0.39%                     |
| 1771180     | 111109657             | 73586982                     | 66.23%                  | 198.77                | 5138970                  | 4309533                             | 4385684                  | 47113                    | 4225                     | 701948                           | 0.46%                     |
| 1773040A    | 50223319              | 43771824                     | 87.15%                  | 197.92                | 17308756                 | 16474645                            | 16952411                 | 103965                   | 12559                    | 239821                           | 0.34%                     |
| 1776331A    | 55609145              | 44226408                     | 79.53%                  | 196.74                | 18106799                 | 16971768                            | 17418542                 | 138769                   | 13375                    | 536113                           | 0.50%                     |
| 1784113C    | 50375715              | 41663570                     | 82.71%                  | 198.06                | 13826670                 | 13091671                            | 13437652                 | 91302                    | 9474                     | 288242                           | 0.50%                     |
| 1784113     | 64967753              | 26065297                     | 40.12%                  | 198.56                | 3839888                  | 3539020                             | 3653379                  | 29539                    | 1782                     | 155188                           | 0.48%                     |
| 1787667A    | 50543982              | 43237304                     | 85.54%                  | 197.79                | 16127104                 | 15330862                            | 15787421                 | 97084                    | 10944                    | 231655                           | 0.40%                     |



| Sample ID | Number of input reads | Uniquely mapped reads number | Uniquely mapped reads % | Average mapped length | Number of splices: Total | Number of splices: Annotated (sjdb) | Number of splices: GT/AG | Number of splices: GC/AG | Number of splices: AT/AC | Number of splices: Non-canonical | Mismatch rate per base, % |
|-----------|-----------------------|------------------------------|-------------------------|-----------------------|--------------------------|-------------------------------------|--------------------------|--------------------------|--------------------------|----------------------------------|---------------------------|
| 1799829A  | 50318541              | 42977792                     | 85.41%                  | 197.67                | 16926572                 | 16092858                            | 16612958                 | 102597                   | 9233                     | 201784                           | 0.44%                     |
| 1805451A  | 50967081              | 44177781                     | 86.68%                  | 198.11                | 19384973                 | 18569850                            | 18998432                 | 124016                   | 13750                    | 248775                           | 0.42%                     |
| 1808689A  | 55578309              | 45451741                     | 81.78%                  | 196.9                 | 19624155                 | 18564102                            | 19073138                 | 130978                   | 12193                    | 407846                           | 0.45%                     |
| 1810051A  | 26973486              | 19833475                     | 73.53%                  | 196.27                | 7059228                  | 6589936                             | 6811040                  | 47626                    | 4553                     | 196009                           | 0.47%                     |
| 1817230A  | 50282963              | 43795812                     | 87.10%                  | 198.08                | 13276443                 | 12524976                            | 12900873                 | 93295                    | 10353                    | 271922                           | 0.41%                     |
| 1818805A  | 55203336              | 47871608                     | 86.72%                  | 198.25                | 16659463                 | 15823405                            | 16266768                 | 106581                   | 10589                    | 275525                           | 0.41%                     |
| 1822008A  | 55979695              | 48079977                     | 85.89%                  | 197.76                | 15153686                 | 14343421                            | 14811712                 | 93327                    | 9870                     | 238777                           | 0.42%                     |
| 1824723A  | 48723892              | 37086910                     | 76.12%                  | 196.94                | 14358204                 | 13572535                            | 13986232                 | 91481                    | 11342                    | 269149                           | 0.47%                     |
| 1829253A  | 55073416              | 48862416                     | 88.72%                  | 198.46                | 5508427                  | 4405531                             | 4823786                  | 85232                    | 7434                     | 591975                           | 0.51%                     |
| 1830154A  | 55437679              | 47942585                     | 86.48%                  | 198.26                | 20151322                 | 19334514                            | 19706942                 | 141834                   | 12541                    | 290005                           | 0.46%                     |
| 1831458A  | 50533985              | 44660921                     | 88.38%                  | 197.8                 | 17949045                 | 17077323                            | 17551000                 | 113582                   | 12229                    | 272234                           | 0.39%                     |
| 1831610A  | 50430255              | 39742144                     | 78.81%                  | 195.75                | 19196832                 | 18133882                            | 18525077                 | 151877                   | 14899                    | 504979                           | 0.46%                     |
| 1835320A  | 47867276              | 35441899                     | 74.04%                  | 196.05                | 12234476                 | 11359966                            | 11699443                 | 88376                    | 8916                     | 437741                           | 0.50%                     |
| 1837489A  | 50332068              | 42833100                     | 85.10%                  | 197.77                | 16805315                 | 16009662                            | 16426549                 | 103054                   | 9623                     | 266089                           | 0.43%                     |
| 1838221C  | 51025937              | 42786624                     | 83.85%                  | 197.22                | 17458854                 | 16561553                            | 16991444                 | 122678                   | 12129                    | 332603                           | 0.41%                     |
| 1840338A  | 60509619              | 45978035                     | 75.98%                  | 197.86                | 13337828                 | 12551964                            | 12808859                 | 97440                    | 9783                     | 421746                           | 0.56%                     |
| 1841812A  | 70208113              | 55135601                     | 78.53%                  | 196.73                | 21743757                 | 20453776                            | 21055395                 | 151363                   | 15186                    | 521813                           | 0.47%                     |
| 1843877A  | 27008679              | 19750674                     | 73.13%                  | 195.63                | 7600326                  | 7068905                             | 7296997                  | 50774                    | 5115                     | 247440                           | 0.51%                     |
| 1844917B  | 53148860              | 27846832                     | 52.39%                  | 196.64                | 2300505                  | 1027547                             | 1279452                  | 19079                    | 2735                     | 999239                           | 0.84%                     |
| 1846752A  | 68441700              | 52452928                     | 76.64%                  | 196.12                | 17819984                 | 16554443                            | 17139718                 | 133950                   | 13836                    | 532480                           | 0.45%                     |
| 1849492A1 | 50277466              | 44068971                     | 87.65%                  | 198.14                | 17633556                 | 16796257                            | 17217557                 | 119429                   | 12882                    | 283688                           | 0.37%                     |
| 1849492A  | 50956773              | 43737773                     | 85.83%                  | 197.83                | 19185402                 | 18292511                            | 18754169                 | 125296                   | 12741                    | 293196                           | 0.41%                     |
| 1849694C  | 50372883              | 43034406                     | 85.43%                  | 197.61                | 13732037                 | 12954934                            | 13286932                 | 100284                   | 10215                    | 334606                           | 0.46%                     |
| 1851168A  | 64947759              | 53274571                     | 82.03%                  | 197.17                | 20882930                 | 19733383                            | 20295474                 | 156091                   | 15816                    | 415549                           | 0.39%                     |
| 1853560A  | 55479616              | 47214124                     | 85.10%                  | 196.79                | 19087933                 | 17960065                            | 18565430                 | 126617                   | 12539                    | 383347                           | 0.42%                     |
| 1853798A  | 64751975              | 52601210                     | 81.23%                  | 197.01                | 16999204                 | 15852016                            | 16332369                 | 126716                   | 11834                    | 528285                           | 0.38%                     |

| Sample ID | Number of input reads | Uniquely mapped reads number | Uniquely mapped reads % | Average mapped length | Number of splices: Total | Number of splices: Annotated (sjdb) | Number of splices: GT/AG | Number of splices: GC/AG | Number of splices: AT/AC | Number of splices: Non-canonical | Mismatch rate per base, % |
|-----------|-----------------------|------------------------------|-------------------------|-----------------------|--------------------------|-------------------------------------|--------------------------|--------------------------|--------------------------|----------------------------------|---------------------------|
| 1857272A  | 50868632              | 43924407                     | 86.35%                  | 197.65                | 16762431                 | 15878129                            | 16397898                 | 103636                   | 10513                    | 250384                           | 0.43%                     |
| 1858491A  | 60537322              | 45954062                     | 75.91%                  | 198.29                | 6022390                  | 5352233                             | 5545880                  | 56498                    | 5238                     | 414774                           | 0.55%                     |
| 1858555A  | 58620448              | 44155158                     | 75.32%                  | 197.31                | 7040815                  | 5846983                             | 6098129                  | 97113                    | 8147                     | 837426                           | 0.48%                     |
| 1858985A  | 55477419              | 43578970                     | 78.55%                  | 197.75                | 18212983                 | 17374027                            | 17703698                 | 132935                   | 13569                    | 362781                           | 0.46%                     |
| 1859699A  | 67415028              | 50230829                     | 74.51%                  | 197.17                | 12838076                 | 11218335                            | 11592865                 | 116513                   | 10149                    | 1118549                          | 0.47%                     |
| 1860881A  | 72120533              | 42020761                     | 58.26%                  | 197.51                | 6280283                  | 5160993                             | 5403380                  | 92527                    | 6607                     | 777769                           | 0.50%                     |
| 1860979A  | 60482812              | 44271078                     | 73.20%                  | 198.11                | 8434542                  | 7823002                             | 8052624                  | 63778                    | 5642                     | 312498                           | 0.56%                     |
| 1861715A  | 64649921              | 48526800                     | 75.06%                  | 197.96                | 7840317                  | 6833930                             | 7068405                  | 96709                    | 6960                     | 668243                           | 0.47%                     |
| 1864082A  | 60658298              | 47062830                     | 77.59%                  | 198.1                 | 16341159                 | 15698908                            | 16010806                 | 97780                    | 10976                    | 221597                           | 0.38%                     |
| 1864085A  | 59549904              | 37497320                     | 62.97%                  | 198.12                | 9462472                  | 8934702                             | 9158145                  | 61607                    | 6615                     | 236105                           | 0.43%                     |
| 1864179A  | 60431638              | 46583650                     | 77.08%                  | 198.09                | 6600144                  | 5862809                             | 6084769                  | 63951                    | 5608                     | 445816                           | 0.55%                     |
| 1865587A  | 20993300              | 17615667                     | 83.91%                  | 198.2                 | 2232512                  | 1989640                             | 2086424                  | 18169                    | 2024                     | 125895                           | 0.58%                     |
| 1865617A  | 50748225              | 43268952                     | 85.26%                  | 197.76                | 19028998                 | 18250364                            | 18620774                 | 119338                   | 12062                    | 276824                           | 0.60%                     |
| 1865617C  | 50335453              | 41876184                     | 83.19%                  | 198.33                | 18028583                 | 17285945                            | 17547565                 | 129756                   | 11393                    | 339869                           | 0.39%                     |
| 1865678C  | 50446197              | 39658212                     | 78.61%                  | 197.43                | 12378391                 | 11603649                            | 11961704                 | 85305                    | 9176                     | 322206                           | 0.68%                     |
| 1865727A  | 50150895              | 41400122                     | 82.55%                  | 197.69                | 17101299                 | 16301896                            | 16702233                 | 112220                   | 12649                    | 274197                           | 0.42%                     |
| 1865925A  | 24360684              | 18059615                     | 74.13%                  | 197.53                | 3359126                  | 2958126                             | 3086864                  | 27901                    | 2743                     | 241618                           | 0.59%                     |
| 1867295A  | 50580827              | 41803507                     | 82.65%                  | 197.4                 | 16279996                 | 15376507                            | 15826361                 | 113439                   | 11209                    | 328987                           | 0.49%                     |
| 1867559A  | 50394074              | 38633407                     | 76.66%                  | 198.05                | 17608294                 | 16890505                            | 17235458                 | 115737                   | 12313                    | 244786                           | 0.46%                     |
| 1869841B  | 55687383              | 46414252                     | 83.35%                  | 198.57                | 12689556                 | 12031288                            | 12298417                 | 82772                    | 9020                     | 299347                           | 0.51%                     |
| 1870205A  | 76899604              | 53790173                     | 69.95%                  | 197.57                | 9153431                  | 7808049                             | 8130078                  | 112212                   | 8503                     | 902638                           | 0.55%                     |
| 1870332A  | 69329715              | 57707928                     | 83.24%                  | 197.83                | 8034696                  | 6645548                             | 6936715                  | 126755                   | 9556                     | 961670                           | 0.47%                     |
| 1870541A  | 76136994              | 50037405                     | 65.72%                  | 196.95                | 8954770                  | 7407643                             | 7783640                  | 118440                   | 8918                     | 1043772                          | 0.51%                     |
| 1870933A  | 28004455              | 17999847                     | 64.27%                  | 197.37                | 2637150                  | 2078743                             | 2210012                  | 23897                    | 2447                     | 400794                           | 0.70%                     |
| 1871082A  | 50438417              | 36455638                     | 72.28%                  | 198.36                | 17144604                 | 16436282                            | 16772361                 | 115500                   | 13062                    | 243681                           | 0.37%                     |
| 1871427C  | 50184814              | 42540616                     | 84.77%                  | 197.99                | 20602550                 | 19794979                            | 20172715                 | 136695                   | 14147                    | 278993                           | 0.40%                     |

| Sample ID | Number of input reads | Uniquely mapped reads number | Uniquely mapped reads % | Average mapped length | Number of splices: Total | Number of splices: Annotated (sjdb) | Number of splices: GT/AG | Number of splices: GC/AG | Number of splices: AT/AC | Number of splices: Non-canonical | Mismatch rate per base, % |
|-----------|-----------------------|------------------------------|-------------------------|-----------------------|--------------------------|-------------------------------------|--------------------------|--------------------------|--------------------------|----------------------------------|---------------------------|
| 1871480A  | 39426664              | 24946738                     | 63.27%                  | 197.2                 | 3144370                  | 2419626                             | 2598281                  | 31525                    | 3601                     | 510963                           | 0.72%                     |
| 1872105A  | 50049231              | 43795230                     | 87.50%                  | 198.02                | 15799300                 | 15029609                            | 15488112                 | 96851                    | 11212                    | 203125                           | 0.49%                     |
| 1873326C  | 51407866              | 44581177                     | 86.72%                  | 197.69                | 17618803                 | 16716031                            | 17156007                 | 121699                   | 12855                    | 328242                           | 0.40%                     |
| 1874019A  | 26871108              | 21329390                     | 79.38%                  | 198.29                | 2391488                  | 2110457                             | 2217960                  | 22292                    | 2066                     | 149170                           | 0.56%                     |
| 1874505A  | 75133670              | 60351784                     | 80.33%                  | 197.18                | 10181773                 | 8388752                             | 8780740                  | 145248                   | 11717                    | 1244068                          | 0.54%                     |
| 1874533A  | 69526806              | 56784471                     | 81.67%                  | 197.38                | 8754673                  | 7223896                             | 7556017                  | 123103                   | 8725                     | 1066828                          | 0.51%                     |
| 1875509A  | 60566756              | 31822774                     | 52.54%                  | 196.65                | 2655892                  | 1257610                             | 1551553                  | 37219                    | 4377                     | 1062743                          | 0.82%                     |
| 1876394B  | 60292278              | 32874874                     | 54.53%                  | 196.58                | 4176737                  | 2952378                             | 3221322                  | 52149                    | 5146                     | 898120                           | 1.12%                     |
| 1877908C  | 50320031              | 36844861                     | 73.22%                  | 197.31                | 13517358                 | 12901235                            | 13211488                 | 85584                    | 8615                     | 211671                           | 0.70%                     |
| 1878930A  | 50622720              | 44391185                     | 87.69%                  | 198.1                 | 15046132                 | 14284331                            | 14622827                 | 101028                   | 9269                     | 313008                           | 0.37%                     |
| 1878930B  | 60110336              | 39985585                     | 66.52%                  | 198.21                | 6327378                  | 5795118                             | 6033943                  | 46405                    | 4178                     | 242852                           | 0.52%                     |
| 1878996A  | 50814612              | 42685545                     | 84.00%                  | 197.83                | 18078623                 | 17170799                            | 17710585                 | 110382                   | 11548                    | 246108                           | 0.38%                     |
| 1879308B  | 45643990              | 36341685                     | 79.62%                  | 198.2                 | 5264286                  | 4572448                             | 4786231                  | 49616                    | 4927                     | 423512                           | 0.60%                     |
| 1880231B  | 38161846              | 18380804                     | 48.17%                  | 196.36                | 1637815                  | 709317                              | 889723                   | 12740                    | 2080                     | 733272                           | 0.95%                     |
| 1880284B  | 32847998              | 25498579                     | 77.63%                  | 198.1                 | 3614310                  | 3223887                             | 3350952                  | 30487                    | 3145                     | 229726                           | 0.62%                     |
| 1880378B  | 59988442              | 27009969                     | 45.03%                  | 196.1                 | 3794845                  | 2176344                             | 2500117                  | 38705                    | 4581                     | 1251442                          | 0.89%                     |
| 1880678A  | 50724958              | 33259412                     | 65.57%                  | 197.54                | 16515404                 | 15761280                            | 16085526                 | 120213                   | 11504                    | 298161                           | 0.37%                     |
| 1880678B  | 50510104              | 38050983                     | 75.33%                  | 198.05                | 14985625                 | 14271528                            | 14570691                 | 105254                   | 11576                    | 298104                           | 0.40%                     |
| 1881219A  | 20903284              | 14854097                     | 71.06%                  | 197.66                | 1715000                  | 1367959                             | 1467593                  | 13828                    | 1629                     | 231950                           | 0.61%                     |
| 1881406A  | 50549489              | 43076331                     | 85.22%                  | 197.46                | 15986129                 | 15066136                            | 15626944                 | 102424                   | 10974                    | 245787                           | 0.49%                     |
| 1881428B  | 26339141              | 22552987                     | 85.63%                  | 198.4                 | 2250060                  | 1967073                             | 2081104                  | 20054                    | 2399                     | 146503                           | 0.58%                     |
| 1881790A1 | 50389457              | 43407555                     | 86.14%                  | 198                   | 15695342                 | 14901688                            | 15320381                 | 107222                   | 12564                    | 255175                           | 0.42%                     |
| 1881790A  | 50441372              | 44104013                     | 87.44%                  | 198.22                | 14160978                 | 13432447                            | 13824007                 | 93495                    | 9752                     | 233724                           | 0.47%                     |
| 1883324B  | 37658332              | 32477891                     | 86.24%                  | 198.04                | 4531629                  | 4065780                             | 4253311                  | 39699                    | 3784                     | 234835                           | 0.56%                     |
| 1883327B  | 50183990              | 39702977                     | 79.11%                  | 197.58                | 6533113                  | 5748185                             | 5984688                  | 58785                    | 5926                     | 483714                           | 0.58%                     |
| 1883356A  | 27839970              | 15347779                     | 55.13%                  | 197.11                | 2277716                  | 1743602                             | 1863502                  | 19978                    | 2300                     | 391936                           | 0.74%                     |

| Sample ID | Number of input reads | Uniquely mapped reads number | Uniquely mapped reads % | Average mapped length | Number of splices: Total | Number of splices: Annotated (sjdb) | Number of splices: GT/AG | Number of splices: GC/AG | Number of splices: AT/AC | Number of splices: Non-canonical | Mismatch rate per base, % |
|-----------|-----------------------|------------------------------|-------------------------|-----------------------|--------------------------|-------------------------------------|--------------------------|--------------------------|--------------------------|----------------------------------|---------------------------|
| 1883444B  | 60146861              | 29438064                     | 48.94%                  | 196.38                | 3592880                  | 2012978                             | 2322816                  | 47019                    | 4995                     | 1218050                          | 0.85%                     |
| 1883708A  | 21519376              | 17745658                     | 82.46%                  | 198.01                | 3150047                  | 2869246                             | 2972491                  | 26654                    | 2822                     | 148080                           | 0.59%                     |
| 1883814A  | 50973691              | 44617123                     | 87.53%                  | 197.91                | 18852534                 | 18001714                            | 18459674                 | 113246                   | 11673                    | 267941                           | 0.46%                     |
| 1884008A  | 32488762              | 16854398                     | 51.88%                  | 196.48                | 1579505                  | 775385                              | 926808                   | 16601                    | 2532                     | 633564                           | 0.84%                     |
| 1884478A  | 36725761              | 30323219                     | 82.57%                  | 198.02                | 5376804                  | 4945096                             | 5109112                  | 44438                    | 3805                     | 219449                           | 0.55%                     |
| 1884513A  | 37054014              | 14571675                     | 39.33%                  | 195.22                | 1878160                  | 704093                              | 919096                   | 15699                    | 2864                     | 940501                           | 1.06%                     |
| 1884678A  | 60155214              | 51177691                     | 85.08%                  | 197.99                | 16543767                 | 15635448                            | 16134836                 | 108213                   | 9992                     | 290726                           | 0.46%                     |
| 1884726A  | 51221228              | 25327628                     | 49.45%                  | 196.39                | 3433108                  | 2058663                             | 2328660                  | 48916                    | 4967                     | 1050565                          | 0.81%                     |
| 1884881A  | 50207502              | 43795153                     | 87.23%                  | 197.92                | 16479686                 | 15629214                            | 16114770                 | 105683                   | 10778                    | 248455                           | 0.41%                     |
| 1885869A  | 50196751              | 42666939                     | 85.00%                  | 198.15                | 23554609                 | 22745421                            | 23038741                 | 157237                   | 16232                    | 342399                           | 0.38%                     |
| 1886064A  | 50177732              | 43031108                     | 85.76%                  | 197.55                | 15750103                 | 14829343                            | 15395121                 | 93880                    | 9983                     | 251119                           | 0.34%                     |
| 1886485A  | 27533118              | 23966880                     | 87.05%                  | 198.28                | 3469801                  | 3165962                             | 3270578                  | 31100                    | 3156                     | 164967                           | 0.44%                     |
| 1886703A  | 60023669              | 49025002                     | 81.68%                  | 198.04                | 11344799                 | 10438946                            | 10794167                 | 86868                    | 8763                     | 455001                           | 0.50%                     |
| 1886737A  | 50536867              | 43084237                     | 85.25%                  | 197.63                | 15341002                 | 14478883                            | 14967628                 | 102140                   | 10289                    | 260945                           | 0.38%                     |
| 1886923A  | 50569593              | 43927687                     | 86.87%                  | 197.98                | 19315423                 | 18520729                            | 18994961                 | 106478                   | 10397                    | 203587                           | 0.36%                     |
| 1887010A  | 50576614              | 39075233                     | 77.26%                  | 198.1                 | 18330389                 | 17583616                            | 18003872                 | 110416                   | 12554                    | 203547                           | 0.43%                     |
| 1887041A  | 50039041              | 43899635                     | 87.73%                  | 198.11                | 19033182                 | 18222419                            | 18706731                 | 108261                   | 12797                    | 205393                           | 0.45%                     |
| 1887113A  | 50712619              | 44084785                     | 86.93%                  | 197.87                | 20844618                 | 19967542                            | 20402727                 | 128135                   | 13832                    | 299924                           | 0.42%                     |
| 1887168A  | 50546184              | 42567049                     | 84.21%                  | 197.66                | 18334976                 | 17417405                            | 17883832                 | 122211                   | 12788                    | 316145                           | 0.41%                     |
| 1887311A  | 50724663              | 43779222                     | 86.31%                  | 197.88                | 19550516                 | 18688944                            | 19102742                 | 125050                   | 13407                    | 309317                           | 0.39%                     |
| 1888087A  | 50912098              | 44219610                     | 86.85%                  | 197.76                | 19258634                 | 18322843                            | 18843045                 | 122702                   | 13684                    | 279203                           | 0.44%                     |
| 1888328A  | 50535753              | 43878017                     | 86.83%                  | 197.81                | 16733271                 | 15891596                            | 16370064                 | 105964                   | 11364                    | 245879                           | 0.45%                     |
| 1888419A  | 32264981              | 28238029                     | 87.52%                  | 198.16                | 4998927                  | 4660291                             | 4773544                  | 40868                    | 3653                     | 180862                           | 0.66%                     |
| 1888448A  | 50947942              | 45293759                     | 88.90%                  | 197.95                | 16995085                 | 16100628                            | 16609423                 | 105539                   | 12096                    | 268027                           | 0.44%                     |
| 1888951A  | 51909385              | 44160408                     | 85.07%                  | 198.02                | 17146530                 | 16318084                            | 16816434                 | 103191                   | 10695                    | 216210                           | 0.46%                     |
| 1889293   | 50054541              | 40619009                     | 81.15%                  | 197.78                | 14734571                 | 14085056                            | 14450203                 | 87774                    | 8986                     | 187608                           | 0.71%                     |

| Sample ID | Number of input reads | Uniquely mapped reads number | Uniquely mapped reads % | Average mapped length | Number of splices: Total | Number of splices: Annotated (sjdb) | Number of splices: GT/AG | Number of splices: GC/AG | Number of splices: AT/AC | Number of splices: Non-canonical | Mismatch rate per base, % |
|-----------|-----------------------|------------------------------|-------------------------|-----------------------|--------------------------|-------------------------------------|--------------------------|--------------------------|--------------------------|----------------------------------|---------------------------|
| 1889526A  | 50903873              | 43778603                     | 86.00%                  | 197.7                 | 18077907                 | 17176963                            | 17697556                 | 108666                   | 12569                    | 259116                           | 0.46%                     |
| 1889576A  | 50320899              | 43847115                     | 87.13%                  | 197.54                | 15724780                 | 14815564                            | 15396204                 | 96253                    | 10129                    | 222194                           | 0.43%                     |
| 1889737A  | 55575037              | 44702525                     | 80.44%                  | 196.75                | 19461836                 | 18346255                            | 18832126                 | 154315                   | 15097                    | 460298                           | 0.47%                     |
| 1889952C  | 50344112              | 39490269                     | 78.44%                  | 197.34                | 12422017                 | 11826661                            | 12119411                 | 76168                    | 8479                     | 217959                           | 0.70%                     |
| 1890001A  | 24135051              | 20907612                     | 86.63%                  | 198.15                | 3324923                  | 3050254                             | 3180126                  | 26039                    | 2576                     | 116182                           | 0.54%                     |
| 1890150A  | 50605752              | 43491898                     | 85.94%                  | 197.97                | 18542836                 | 17747543                            | 18157052                 | 115089                   | 12481                    | 258214                           | 0.39%                     |
| 1890188A  | 50345973              | 42930795                     | 85.27%                  | 197.63                | 16037862                 | 15197992                            | 15668481                 | 96903                    | 9822                     | 262656                           | 0.46%                     |
| 1890357A  | 50391696              | 42101479                     | 83.55%                  | 197.67                | 16308263                 | 15452268                            | 15911346                 | 104859                   | 11805                    | 280253                           | 0.45%                     |
| 1890561A  | 60292460              | 48849060                     | 81.02%                  | 198.14                | 11621321                 | 10884603                            | 11237129                 | 83456                    | 7592                     | 293144                           | 0.52%                     |
| 1890841A  | 57745655              | 51812307                     | 89.73%                  | 198.25                | 9897562                  | 9064805                             | 9449919                  | 80823                    | 7358                     | 359462                           | 0.49%                     |
| 1891008C  | 50467871              | 39055359                     | 77.39%                  | 198.07                | 14834660                 | 14136042                            | 14487479                 | 101380                   | 9419                     | 236382                           | 0.41%                     |
| 1891753C  | 50256723              | 40341993                     | 80.27%                  | 198.03                | 16429143                 | 15711787                            | 16039693                 | 108950                   | 10689                    | 269811                           | 0.42%                     |
| 1892326C  | 50261761              | 40185217                     | 79.95%                  | 197.87                | 15898358                 | 15167470                            | 15497048                 | 107971                   | 10606                    | 282733                           | 0.42%                     |
| 1892481C  | 50242277              | 41057165                     | 81.72%                  | 197.45                | 13007242                 | 12305033                            | 12646247                 | 87912                    | 8726                     | 264357                           | 0.89%                     |
| 1892655C  | 45866838              | 35768435                     | 77.98%                  | 197.21                | 11908695                 | 11163923                            | 11466472                 | 91206                    | 8767                     | 342250                           | 0.43%                     |
| 1892923C  | 50134663              | 42377668                     | 84.53%                  | 198.04                | 16947594                 | 16177845                            | 16567843                 | 114546                   | 10776                    | 254429                           | 0.42%                     |
| 1893061C  | 50343852              | 41176521                     | 81.79%                  | 197.98                | 17925661                 | 17137583                            | 17438929                 | 130752                   | 13167                    | 342813                           | 0.39%                     |
| 1893092C  | 50497272              | 41924852                     | 83.02%                  | 197.78                | 11029723                 | 10409710                            | 10746311                 | 70583                    | 7932                     | 204897                           | 0.82%                     |
| 1893507A  | 8850666               | 7511828                      | 84.87%                  | 197.83                | 3491052                  | 3340367                             | 3408896                  | 24655                    | 2460                     | 55041                            | 0.43%                     |
| 1893988A  | 55259450              | 44088731                     | 79.78%                  | 196.81                | 13754922                 | 12751400                            | 13223662                 | 107561                   | 9194                     | 414505                           | 0.46%                     |
| 1894005C  | 50463967              | 38643355                     | 76.58%                  | 197.8                 | 14851089                 | 14193339                            | 14510983                 | 92520                    | 10193                    | 237393                           | 0.43%                     |
| 1894201C  | 50361823              | 41034559                     | 81.48%                  | 196.97                | 14384170                 | 13527458                            | 13930295                 | 94147                    | 9164                     | 350564                           | 0.48%                     |
| 1894272C  | 50423233              | 41636658                     | 82.57%                  | 198.16                | 10396443                 | 9793461                             | 10091475                 | 72849                    | 6528                     | 225591                           | 0.44%                     |
| 1894643C  | 50180815              | 42509669                     | 84.71%                  | 197.68                | 13212313                 | 12510970                            | 12812915                 | 92872                    | 9263                     | 297263                           | 0.76%                     |
| 1894735C  | 50548190              | 40974071                     | 81.06%                  | 198.06                | 13421997                 | 12688054                            | 13009364                 | 99012                    | 10529                    | 303092                           | 0.41%                     |
| 1894753A  | 57608530              | 51507655                     | 89.41%                  | 197.96                | 8493392                  | 7732447                             | 8061377                  | 64537                    | 7346                     | 360132                           | 0.48%                     |

| Sample ID | Number of input reads | Uniquely mapped reads number | Uniquely mapped reads % | Average mapped length | Number of splices: Total | Number of splices: Annotated (sjdb) | Number of splices: GT/AG | Number of splices: GC/AG | Number of splices: AT/AC | Number of splices: Non-canonical | Mismatch rate per base, % |
|-----------|-----------------------|------------------------------|-------------------------|-----------------------|--------------------------|-------------------------------------|--------------------------|--------------------------|--------------------------|----------------------------------|---------------------------|
| 1894774A  | 28406481              | 25075691                     | 88.27%                  | 198.13                | 6473209                  | 6066941                             | 6219396                  | 50935                    | 5095                     | 197783                           | 0.40%                     |
| 1894880A  | 33421706              | 27649497                     | 82.73%                  | 198.15                | 5310620                  | 4898292                             | 5031679                  | 44798                    | 4736                     | 229407                           | 0.51%                     |
| 1894926C  | 50192908              | 40780936                     | 81.25%                  | 197.85                | 15281004                 | 14535829                            | 14886333                 | 102306                   | 10070                    | 282295                           | 0.41%                     |
| 1894946A  | 50568371              | 42304263                     | 83.66%                  | 197.59                | 20405500                 | 19500709                            | 19946708                 | 135541                   | 15377                    | 307874                           | 0.40%                     |
| 1895869C  | 50330302              | 43210878                     | 85.85%                  | 197.99                | 14864005                 | 14090601                            | 14440650                 | 106091                   | 10086                    | 307178                           | 0.44%                     |
| 1895926A  | 41968425              | 34244158                     | 81.60%                  | 197.75                | 13129862                 | 12484298                            | 12787106                 | 84846                    | 7779                     | 250131                           | 0.44%                     |
| 1896461C  | 50407085              | 40312739                     | 79.97%                  | 197.56                | 14992290                 | 14255088                            | 14569681                 | 104768                   | 8857                     | 308984                           | 0.74%                     |
| 1897393A  | 60050491              | 53601436                     | 89.26%                  | 197.97                | 9817307                  | 9038928                             | 9332609                  | 83388                    | 8487                     | 392823                           | 0.54%                     |
| 1897415A  | 25595453              | 21971587                     | 85.84%                  | 197.56                | 9651604                  | 9132744                             | 9268758                  | 83394                    | 7548                     | 291904                           | 0.54%                     |
| 1897444A  | 22166996              | 18943070                     | 85.46%                  | 197.73                | 2034452                  | 1798499                             | 1875022                  | 20042                    | 2147                     | 137241                           | 0.43%                     |
| 1897570A  | 50379461              | 41993229                     | 83.35%                  | 197.63                | 19103506                 | 18237765                            | 18599564                 | 139867                   | 13466                    | 350609                           | 0.41%                     |
| 1897700A  | 24680603              | 20222916                     | 81.94%                  | 198.32                | 3756761                  | 3504299                             | 3590813                  | 29643                    | 2326                     | 133979                           | 0.58%                     |
| 1897847A  | 50533988              | 37065696                     | 73.35%                  | 197.98                | 15514801                 | 14870960                            | 15259410                 | 89657                    | 9639                     | 156095                           | 0.46%                     |
| 1897877A  | 50690211              | 41187620                     | 81.25%                  | 197.16                | 20335340                 | 19499454                            | 19947717                 | 130093                   | 12192                    | 245338                           | 0.40%                     |
| 1898490A  | 26563021              | 23045271                     | 86.76%                  | 198.12                | 2948252                  | 2623215                             | 2734232                  | 26288                    | 2880                     | 184852                           | 0.52%                     |
| 1898496A  | 29499496              | 23543953                     | 79.81%                  | 197.83                | 3903089                  | 3631054                             | 3732684                  | 29930                    | 2829                     | 137646                           | 0.76%                     |
| 1898529A  | 29574850              | 26308932                     | 88.96%                  | 197.92                | 4814396                  | 4499306                             | 4613138                  | 37448                    | 3672                     | 160138                           | 0.73%                     |
| 1898696A  | 50496501              | 37773708                     | 74.80%                  | 197.94                | 18214910                 | 17521625                            | 17849127                 | 116320                   | 11677                    | 237786                           | 0.40%                     |
| 1898763A  | 50314696              | 41743559                     | 82.96%                  | 198.05                | 15773030                 | 15043364                            | 15349033                 | 110946                   | 10753                    | 302298                           | 0.46%                     |
| 1898813A  | 47527165              | 42463365                     | 89.35%                  | 198.55                | 5481175                  | 5088994                             | 5248225                  | 39997                    | 4737                     | 188216                           | 0.51%                     |
| 1899012A  | 50186189              | 37662335                     | 75.05%                  | 198.43                | 16574074                 | 15924382                            | 16245966                 | 111003                   | 11506                    | 205599                           | 0.37%                     |
| 1899032A  | 50182820              | 42867914                     | 85.42%                  | 197.84                | 17471234                 | 16605284                            | 17024428                 | 127723                   | 12581                    | 306502                           | 0.40%                     |
| 1899157A  | 50612382              | 42918409                     | 84.80%                  | 198.2                 | 16861953                 | 16143312                            | 16488533                 | 109238                   | 10619                    | 253563                           | 0.45%                     |
| 1899447A  | 50749570              | 34317573                     | 67.62%                  | 197.94                | 11907238                 | 11325531                            | 11608949                 | 78512                    | 9063                     | 210714                           | 0.40%                     |
| 1899554A  | 50343158              | 41346720                     | 82.13%                  | 197.5                 | 17992894                 | 17129904                            | 17506198                 | 130865                   | 13744                    | 342087                           | 0.43%                     |
| 1899597A  | 55766835              | 43051144                     | 77.20%                  | 197.46                | 10043116                 | 9223666                             | 9525933                  | 90711                    | 8355                     | 418117                           | 0.41%                     |

| Sample ID | Number of input reads | Uniquely mapped reads number | Uniquely mapped reads % | Average mapped length | Number of splices: Total | Number of splices: Annotated (sjdb) | Number of splices: GT/AG | Number of splices: GC/AG | Number of splices: AT/AC | Number of splices: Non-canonical | Mismatch rate per base, % |
|-----------|-----------------------|------------------------------|-------------------------|-----------------------|--------------------------|-------------------------------------|--------------------------|--------------------------|--------------------------|----------------------------------|---------------------------|
| 1899623A  | 50819770              | 43112490                     | 84.83%                  | 198.17                | 18548503                 | 17767697                            | 18131357                 | 126589                   | 14039                    | 276518                           | 0.39%                     |
| 1899739A  | 50078973              | 41704063                     | 83.28%                  | 197.83                | 16697470                 | 15878434                            | 16297908                 | 109678                   | 12002                    | 277882                           | 0.41%                     |
| 1899845A  | 50337321              | 43418571                     | 86.26%                  | 197.86                | 14613965                 | 13886385                            | 14257986                 | 96768                    | 9876                     | 249335                           | 0.47%                     |
| 1900924A  | 50348402              | 40942158                     | 81.32%                  | 197.82                | 17401917                 | 16594734                            | 16944663                 | 119241                   | 13236                    | 324777                           | 0.37%                     |
| 1901282A  | 50240223              | 42044256                     | 83.69%                  | 197.51                | 16655319                 | 15845062                            | 16222097                 | 115291                   | 12215                    | 305716                           | 0.39%                     |
| 1901448A  | 51184397              | 44273374                     | 86.50%                  | 198                   | 16806211                 | 16055401                            | 16448605                 | 106664                   | 12080                    | 238862                           | 0.48%                     |
| 1902019A  | 55525964              | 45721417                     | 82.34%                  | 196.81                | 15150230                 | 14115294                            | 14554139                 | 118692                   | 9986                     | 467413                           | 0.46%                     |
| 1902831A  | 50800584              | 43439606                     | 85.51%                  | 197.96                | 17349684                 | 16576320                            | 16955042                 | 114155                   | 12065                    | 268422                           | 0.42%                     |
| 1902979A  | 50418666              | 44238224                     | 87.74%                  | 198.2                 | 17057939                 | 16281713                            | 16672681                 | 110335                   | 11224                    | 263699                           | 0.38%                     |
| 1904061A  | 51902462              | 41604243                     | 80.16%                  | 197.71                | 15517399                 | 14691799                            | 15170422                 | 98348                    | 10825                    | 237804                           | 0.44%                     |
| 1904585A  | 55243140              | 48041133                     | 86.96%                  | 198.07                | 18861392                 | 17960443                            | 18378237                 | 131017                   | 13691                    | 338447                           | 0.39%                     |
| 1904783A  | 55634764              | 44425886                     | 79.85%                  | 196.59                | 13948267                 | 12960164                            | 13432249                 | 102356                   | 9355                     | 404307                           | 0.80%                     |
| 1904904A  | 55506645              | 47691180                     | 85.92%                  | 197.94                | 12416565                 | 11607909                            | 11949485                 | 94600                    | 9032                     | 363448                           | 0.49%                     |
| 1904949A  | 55805696              | 47643031                     | 85.37%                  | 198.03                | 18881887                 | 18049807                            | 18388207                 | 132411                   | 13842                    | 347427                           | 0.47%                     |
| 1904971A  | 55447965              | 47882979                     | 86.36%                  | 198.02                | 17450049                 | 16652877                            | 17061500                 | 115758                   | 12677                    | 260114                           | 0.56%                     |
| 1905067A  | 51012737              | 44273206                     | 86.79%                  | 198.01                | 18481353                 | 17623422                            | 18020362                 | 126333                   | 13098                    | 321560                           | 0.38%                     |
| 1905138A  | 55715652              | 47049577                     | 84.45%                  | 197.73                | 18137830                 | 17275114                            | 17748578                 | 111855                   | 13407                    | 263990                           | 0.45%                     |
| 1905350A  | 50407669              | 43453867                     | 86.20%                  | 197.86                | 17309063                 | 16472057                            | 16873725                 | 116931                   | 11779                    | 306628                           | 0.45%                     |
| 1905402A  | 50970704              | 44338031                     | 86.99%                  | 197.92                | 17757140                 | 16857818                            | 17306040                 | 121543                   | 12293                    | 317264                           | 0.37%                     |
| 1905470A  | 50327406              | 38422919                     | 76.35%                  | 198.15                | 18776174                 | 18020559                            | 18464656                 | 122748                   | 13216                    | 175554                           | 0.42%                     |
| 1905577A  | 55653039              | 47910825                     | 86.09%                  | 198.28                | 23668162                 | 22736007                            | 23129224                 | 172092                   | 17627                    | 349219                           | 0.37%                     |
| 1905833A  | 55390710              | 47359247                     | 85.50%                  | 198.22                | 13239896                 | 12549450                            | 12912100                 | 90948                    | 9143                     | 227705                           | 0.54%                     |
| 1905977A  | 56096473              | 46233147                     | 82.42%                  | 197.78                | 20648370                 | 19790874                            | 20161610                 | 150845                   | 14715                    | 321200                           | 0.38%                     |
| 1906132A  | 55616449              | 48300379                     | 86.85%                  | 197.94                | 16972317                 | 16180523                            | 16588171                 | 110347                   | 13935                    | 259864                           | 0.56%                     |
| 1906391A  | 56143434              | 45477963                     | 81.00%                  | 196.9                 | 16254447                 | 14988401                            | 15559481                 | 127426                   | 11681                    | 555859                           | 0.42%                     |
| 1906588A  | 55196757              | 47235919                     | 85.58%                  | 198.12                | 17405741                 | 16593766                            | 16974466                 | 121834                   | 13155                    | 296286                           | 0.40%                     |

| Sample ID | Number of input reads | Uniquely mapped reads number | Uniquely mapped reads % | Average mapped length | Number of splices: Total | Number of splices: Annotated (sjdb) | Number of splices: GT/AG | Number of splices: GC/AG | Number of splices: AT/AC | Number of splices: Non-canonical | Mismatch rate per base, % |
|-----------|-----------------------|------------------------------|-------------------------|-----------------------|--------------------------|-------------------------------------|--------------------------|--------------------------|--------------------------|----------------------------------|---------------------------|
| 1906614A  | 55171880              | 47495287                     | 86.09%                  | 198.32                | 15813437                 | 14975129                            | 15450812                 | 103915                   | 11630                    | 247080                           | 0.42%                     |
| 1907444A  | 55572884              | 46216207                     | 83.16%                  | 196.8                 | 17509900                 | 16394082                            | 16900150                 | 129631                   | 11848                    | 468271                           | 0.45%                     |
| 1908348A  | 56119352              | 46420678                     | 82.72%                  | 196.65                | 15802910                 | 14668058                            | 15158641                 | 125869                   | 13140                    | 505260                           | 0.48%                     |
| 1908351A  | 55865260              | 46936643                     | 84.02%                  | 198.01                | 19111493                 | 18284198                            | 18694590                 | 134229                   | 13692                    | 268982                           | 0.44%                     |
| 1908612A  | 56115115              | 41716493                     | 74.34%                  | 198.26                | 11106231                 | 10553304                            | 10862908                 | 73208                    | 7633                     | 162482                           | 0.56%                     |
| 1908698A  | 55662373              | 44228613                     | 79.46%                  | 197.15                | 15661526                 | 14622527                            | 15015664                 | 121382                   | 12006                    | 512474                           | 0.54%                     |
| 1908768A  | 55499626              | 46611950                     | 83.99%                  | 198.24                | 13154049                 | 12464701                            | 12849819                 | 89209                    | 9636                     | 205385                           | 0.38%                     |
| 1909623A  | 55969434              | 46091280                     | 82.35%                  | 196.72                | 18647042                 | 17353624                            | 17896577                 | 142159                   | 13896                    | 594410                           | 0.46%                     |
| 1910156A  | 56018168              | 45339356                     | 80.94%                  | 196.99                | 15990378                 | 15020818                            | 15543719                 | 121582                   | 12687                    | 312390                           | 0.54%                     |
| 1910771A  | 55249750              | 38906253                     | 70.42%                  | 195.98                | 16493102                 | 15441884                            | 15770402                 | 132120                   | 10962                    | 579618                           | 0.43%                     |
| 1911215A  | 55665559              | 45131028                     | 81.08%                  | 197.4                 | 16622984                 | 15777778                            | 16156084                 | 121298                   | 12484                    | 333118                           | 0.46%                     |
| 1911217A  | 55406093              | 48313152                     | 87.20%                  | 197.43                | 17528901                 | 16491266                            | 16936830                 | 124559                   | 13169                    | 454343                           | 0.47%                     |
| 1911263A  | 55255920              | 45345158                     | 82.06%                  | 196.68                | 15682043                 | 14541563                            | 15034245                 | 126032                   | 12354                    | 509412                           | 0.48%                     |
| 1911352A  | 48973135              | 40424081                     | 82.54%                  | 197.73                | 18033783                 | 17215230                            | 17668580                 | 106349                   | 12426                    | 246428                           | 0.41%                     |
| 1911496A  | 45660318              | 36880471                     | 80.77%                  | 196.37                | 15170374                 | 14198216                            | 14672460                 | 115168                   | 11250                    | 371496                           | 0.47%                     |
| 1911731A  | 55448035              | 47423405                     | 85.53%                  | 198.08                | 6861062                  | 5970757                             | 6209249                  | 82816                    | 8253                     | 560744                           | 0.43%                     |
| 1912491A  | 42061569              | 31918838                     | 75.89%                  | 197.63                | 13915101                 | 13232324                            | 13629610                 | 85500                    | 9477                     | 190514                           | 0.39%                     |
| 1913516A  | 55392392              | 48195101                     | 87.01%                  | 197.2                 | 20315703                 | 19256122                            | 19814091                 | 137568                   | 14789                    | 349255                           | 0.39%                     |
| 1913593A  | 55336353              | 47877805                     | 86.52%                  | 197.5                 | 18408306                 | 17348376                            | 17941383                 | 125951                   | 14984                    | 325988                           | 0.40%                     |
| 1914065A  | 55619835              | 43832198                     | 78.81%                  | 196.6                 | 15339276                 | 14265208                            | 14708982                 | 107376                   | 12256                    | 510662                           | 0.47%                     |
| 1915169A  | 55484734              | 46546700                     | 83.89%                  | 197.4                 | 18626568                 | 17680585                            | 18189111                 | 119811                   | 12305                    | 305341                           | 0.45%                     |
| 1915523A  | 55304621              | 47398681                     | 85.70%                  | 197.44                | 20916238                 | 20003550                            | 20406805                 | 136346                   | 16937                    | 356150                           | 0.39%                     |
| 1915766A  | 55384626              | 46966127                     | 84.80%                  | 197.66                | 23087307                 | 22039057                            | 22620710                 | 161253                   | 18405                    | 286939                           | 0.43%                     |
| 1916287A  | 55584704              | 49415097                     | 88.90%                  | 197.84                | 17205573                 | 16169198                            | 16679529                 | 118461                   | 12254                    | 395329                           | 0.43%                     |
| 1917945A  | 55680731              | 48770151                     | 87.59%                  | 198.11                | 18551941                 | 17658223                            | 18116320                 | 130554                   | 12682                    | 292385                           | 0.39%                     |
| 1918957A  | 55528300              | 47817696                     | 86.11%                  | 197.28                | 16970209                 | 15809706                            | 16411057                 | 120141                   | 13757                    | 425254                           | 0.41%                     |



| Sample ID | Number of input reads | Uniquely mapped reads number | Uniquely mapped reads % | Average mapped length | Number of splices: Total | Number of splices: Annotated (sjdb) | Number of splices: GT/AG | Number of splices: GC/AG | Number of splices: AT/AC | Number of splices: Non-canonical | Mismatch rate per base, % |
|-----------|-----------------------|------------------------------|-------------------------|-----------------------|--------------------------|-------------------------------------|--------------------------|--------------------------|--------------------------|----------------------------------|---------------------------|
| 1920204A  | 55606462              | 50104215                     | 90.11%                  | 198.04                | 19788216                 | 18670193                            | 19308040                 | 131954                   | 15276                    | 332946                           | 0.45%                     |
| 1921957A  | 55850183              | 46576418                     | 83.40%                  | 196.42                | 21060786                 | 20034750                            | 20528103                 | 145618                   | 14807                    | 372258                           | 0.48%                     |
| 1923328A  | 55518693              | 48952400                     | 88.17%                  | 197.72                | 12622064                 | 11720142                            | 12165452                 | 92390                    | 9791                     | 354431                           | 0.45%                     |
| 1923420A  | 56141456              | 45488330                     | 81.02%                  | 196.91                | 17063593                 | 16068303                            | 16621627                 | 110588                   | 10903                    | 320475                           | 0.46%                     |
| 1923483A  | 76839768              | 54021277                     | 70.30%                  | 196.56                | 22072318                 | 20709105                            | 21417297                 | 154648                   | 15893                    | 484480                           | 0.44%                     |
| 1923555A  | 55562498              | 49989561                     | 89.97%                  | 198.04                | 14833702                 | 13833839                            | 14388693                 | 107036                   | 8157                     | 329816                           | 0.45%                     |
| 1923712A  | 55653384              | 46708907                     | 83.93%                  | 196.36                | 17248604                 | 16128461                            | 16640973                 | 130496                   | 15037                    | 462098                           | 0.45%                     |
| 1923760A  | 55448480              | 47119333                     | 84.98%                  | 196.38                | 22205263                 | 21017860                            | 21525906                 | 161965                   | 17447                    | 499945                           | 0.42%                     |
| 1924049A  | 55264187              | 47904922                     | 86.68%                  | 196.83                | 20495277                 | 19389278                            | 19902705                 | 138385                   | 12998                    | 441189                           | 0.40%                     |
| 1924478A  | 55357596              | 48970446                     | 88.46%                  | 197.62                | 17603954                 | 16637418                            | 17105344                 | 118614                   | 12000                    | 367996                           | 0.45%                     |
| 1925252A  | 81943977              | 68742996                     | 83.89%                  | 197.03                | 22227785                 | 20446050                            | 21189352                 | 188744                   | 17763                    | 831926                           | 0.41%                     |
| 1925846A  | 55116616              | 48869209                     | 88.67%                  | 197.2                 | 17337239                 | 16264055                            | 16820836                 | 122201                   | 12791                    | 381411                           | 0.41%                     |
| 1926132A  | 55399207              | 50758932                     | 91.62%                  | 198.18                | 13098576                 | 12161167                            | 12692798                 | 91854                    | 7469                     | 306455                           | 0.46%                     |
| 1926272A  | 55495860              | 48551341                     | 87.49%                  | 197.47                | 19229193                 | 18140844                            | 18662862                 | 138253                   | 11986                    | 416092                           | 0.41%                     |
| 1926306A  | 55300428              | 44342379                     | 80.18%                  | 197.59                | 14724422                 | 13781531                            | 14329349                 | 92238                    | 11096                    | 291739                           | 0.46%                     |
| 1927301A  | 55150941              | 49959134                     | 90.59%                  | 198.16                | 14710049                 | 13796744                            | 14256905                 | 102165                   | 9915                     | 341064                           | 0.48%                     |
| 1928219A  | 55226603              | 47621437                     | 86.23%                  | 197.65                | 18519199                 | 17476606                            | 17974541                 | 125840                   | 14078                    | 404740                           | 0.44%                     |
| 1928232A  | 55715950              | 47568629                     | 85.38%                  | 197.42                | 14678877                 | 13635804                            | 14157256                 | 101741                   | 11378                    | 408502                           | 0.47%                     |
| 1928274A  | 55540746              | 48243010                     | 86.86%                  | 197.68                | 15123450                 | 14029007                            | 14543457                 | 118180                   | 9897                     | 451916                           | 0.56%                     |
| 1928455A  | 55095767              | 49757362                     | 90.31%                  | 197.93                | 17088308                 | 15986244                            | 16564399                 | 123844                   | 11323                    | 388742                           | 0.41%                     |
| 1929671A  | 55266940              | 48282508                     | 87.36%                  | 197.89                | 18534792                 | 17487648                            | 18079270                 | 117756                   | 12007                    | 325759                           | 0.42%                     |
| 1929976A  | 55656458              | 47546238                     | 85.43%                  | 197.47                | 15057168                 | 14058065                            | 14526753                 | 115096                   | 10118                    | 405201                           | 0.48%                     |
| 1930827A  | 55552413              | 45214141                     | 81.39%                  | 197.22                | 19216183                 | 18084465                            | 18771640                 | 122613                   | 11403                    | 310527                           | 0.48%                     |
| 1932301A  | 55275134              | 48307536                     | 87.39%                  | 197.34                | 15026038                 | 13978807                            | 14480487                 | 114876                   | 11739                    | 418936                           | 0.55%                     |
| 1940746A  | 86325058              | 67219722                     | 77.87%                  | 196.64                | 34763496                 | 32926450                            | 33639344                 | 218393                   | 22068                    | 883691                           | 0.43%                     |
| 1941919   | 84378028              | 68290039                     | 80.93%                  | 197.67                | 30699909                 | 29230102                            | 29807643                 | 211888                   | 20046                    | 660332                           | 0.39%                     |

| Sample ID     | Number of input reads | Uniquely mapped reads number | Uniquely mapped reads % | Average mapped length | Number of splices: Total | Number of splices: Annotated (sjdb) | Number of splices: GT/AG | Number of splices: GC/AG | Number of splices: AT/AC | Number of splices: Non-canonical | Mismatch rate per base, % |
|---------------|-----------------------|------------------------------|-------------------------|-----------------------|--------------------------|-------------------------------------|--------------------------|--------------------------|--------------------------|----------------------------------|---------------------------|
| 1947162       | 89430673              | 69615164                     | 77.84%                  | 197.9                 | 32344363                 | 30969731                            | 31569430                 | 219636                   | 19290                    | 536007                           | 0.40%                     |
| 20180613-1A   | 170675534             | 144453199                    | 84.64%                  | 197.73                | 47641938                 | 44182946                            | 45850686                 | 392065                   | 36160                    | 1363027                          | 0.40%                     |
| 20180613-3A   | 192124594             | 157719319                    | 82.09%                  | 197.54                | 63915639                 | 59689678                            | 61572173                 | 508836                   | 53188                    | 1781442                          | 0.36%                     |
| 20180614-7A   | 170325859             | 145761592                    | 85.58%                  | 197.48                | 54563268                 | 50553956                            | 52580700                 | 432151                   | 45708                    | 1504709                          | 0.42%                     |
| 20180614-9A   | 157219508             | 133131267                    | 84.68%                  | 197.46                | 48101086                 | 44539593                            | 46411008                 | 390104                   | 35890                    | 1264084                          | 0.40%                     |
| 20180619-12A  | 155280577             | 136406718                    | 87.85%                  | 198.08                | 43543458                 | 40935125                            | 42646567                 | 286455                   | 27715                    | 582721                           | 0.46%                     |
| 20180619-8A   | 158182821             | 136029897                    | 86.00%                  | 198.31                | 44038085                 | 41734211                            | 43148990                 | 293022                   | 31693                    | 564380                           | 0.38%                     |
| 20180621-11A  | 164260672             | 134906405                    | 82.13%                  | 197.74                | 55368614                 | 51913688                            | 53803547                 | 402166                   | 38539                    | 1124362                          | 0.37%                     |
| 20180621-16A  | 158314588             | 131369279                    | 82.98%                  | 197.65                | 49337904                 | 46130390                            | 47840484                 | 382070                   | 35956                    | 1079394                          | 0.38%                     |
| 20180621-17A  | 164603400             | 140741653                    | 85.50%                  | 198.02                | 52630119                 | 49550920                            | 51143405                 | 374055                   | 38418                    | 1074241                          | 0.38%                     |
| 20180621-18A  | 155133236             | 132624287                    | 85.49%                  | 197.98                | 49365113                 | 46640113                            | 48077514                 | 338882                   | 36065                    | 912652                           | 0.39%                     |
| 20180621-1A   | 188248720             | 156871234                    | 83.33%                  | 198.01                | 58906866                 | 55819105                            | 57238337                 | 405892                   | 38730                    | 1223907                          | 0.39%                     |
| 20180621-20A  | 164265574             | 135067273                    | 82.22%                  | 198.16                | 37719351                 | 35187502                            | 36766674                 | 263527                   | 25649                    | 663501                           | 0.43%                     |
| 20180621-3A   | 157769628             | 136609256                    | 86.59%                  | 198.35                | 50934070                 | 48346105                            | 49781548                 | 326344                   | 36234                    | 789944                           | 0.39%                     |
| 20180621-4A   | 156000504             | 133304283                    | 85.45%                  | 198.21                | 43749107                 | 41225438                            | 42538464                 | 309809                   | 31517                    | 869317                           | 0.40%                     |
| 20180621-7A   | 189299198             | 148995420                    | 78.71%                  | 197.6                 | 63593190                 | 59720006                            | 61533612                 | 477748                   | 47517                    | 1534313                          | 0.40%                     |
| 20180621-8A   | 157931370             | 128470932                    | 81.35%                  | 198.11                | 51095291                 | 48354291                            | 49787516                 | 348246                   | 38273                    | 921256                           | 0.36%                     |
| 20180621-9A   | 167509335             | 138593019                    | 82.74%                  | 197.98                | 50281409                 | 47489514                            | 49181191                 | 342059                   | 38009                    | 720150                           | 0.38%                     |
| 3-19-1435611A | 106188595             | 83441643                     | 78.58%                  | 196.87                | 28824639                 | 26286738                            | 26990490                 | 272448                   | 26465                    | 1535236                          | 0.43%                     |
| 3-31-1930444A | 143482917             | 115856310                    | 80.75%                  | 196.65                | 43101270                 | 40113057                            | 41726350                 | 289257                   | 28048                    | 1057615                          | 0.46%                     |
| 4-10-1932654A | 82770773              | 64372581                     | 77.77%                  | 196.71                | 29467877                 | 27733875                            | 28497017                 | 207601                   | 22198                    | 741061                           | 0.41%                     |
| 4-2-1922690A  | 87704380              | 70948282                     | 80.89%                  | 196.78                | 22160603                 | 20328017                            | 21075144                 | 193828                   | 18224                    | 873407                           | 0.44%                     |
| 4-3-1927708A  | 80979216              | 62811913                     | 77.57%                  | 196.6                 | 24686746                 | 23023580                            | 23651236                 | 187780                   | 17229                    | 830501                           | 0.47%                     |

| Sample ID    | Number of input reads | Uniquely mapped reads number | Uniquely mapped reads % | Average mapped length | Number of splices: Total | Number of splices: Annotated (sjdb) | Number of splices: GT/AG | Number of splices: GC/AG | Number of splices: AT/AC | Number of splices: Non-canonical | Mismatch rate per base, % |
|--------------|-----------------------|------------------------------|-------------------------|-----------------------|--------------------------|-------------------------------------|--------------------------|--------------------------|--------------------------|----------------------------------|---------------------------|
| 4-8-1932227A | 83150592              | 68770352                     | 82.71%                  | 196.93                | 28876899                 | 27085037                            | 27854273                 | 207508                   | 20582                    | 794536                           | 0.43%                     |
| 8125630A     | 50368727              | 43752776                     | 86.86%                  | 197.93                | 16427945                 | 15588725                            | 16068826                 | 99399                    | 10553                    | 249167                           | 0.45%                     |
| 8128463A     | 46937495              | 40956645                     | 87.26%                  | 197.76                | 16015288                 | 15273614                            | 15660511                 | 114437                   | 10565                    | 229775                           | 0.49%                     |
| 8128721A     | 32984599              | 19094178                     | 57.89%                  | 197.19                | 2109346                  | 1493009                             | 1637830                  | 19165                    | 2212                     | 450139                           | 0.78%                     |
| 8129174A     | 55612502              | 45566026                     | 81.93%                  | 197.78                | 18634875                 | 17714481                            | 18123754                 | 129895                   | 13153                    | 368073                           | 0.39%                     |
| 8131850A     | 55484167              | 43308905                     | 78.06%                  | 196.81                | 17021060                 | 16084917                            | 16544874                 | 121208                   | 12877                    | 342101                           | 0.52%                     |
| 8132228A     | 50429382              | 43132547                     | 85.53%                  | 198.04                | 20532547                 | 19701099                            | 20069569                 | 138704                   | 15290                    | 308984                           | 0.43%                     |
| 8133283A     | 55305477              | 45148649                     | 81.64%                  | 197.91                | 18834538                 | 17982384                            | 18449303                 | 104192                   | 10874                    | 270169                           | 0.49%                     |
| 8133808A     | 38449120              | 32058052                     | 83.38%                  | 198.28                | 4373536                  | 3980922                             | 4108071                  | 36936                    | 3971                     | 224558                           | 0.52%                     |
| 8133904A     | 50777272              | 44456420                     | 87.55%                  | 197.98                | 12713438                 | 11928674                            | 12274912                 | 95897                    | 9811                     | 332818                           | 0.45%                     |
| 8134049A     | 50277297              | 44197712                     | 87.91%                  | 197.9                 | 19037613                 | 18205811                            | 18700905                 | 118794                   | 14337                    | 203577                           | 0.38%                     |
| 8134785C     | 50116488              | 42267394                     | 84.34%                  | 197.64                | 15453390                 | 14659152                            | 15002825                 | 103570                   | 10597                    | 336398                           | 0.67%                     |
| 8135483A     | 50734742              | 43007233                     | 84.77%                  | 198.12                | 23457079                 | 22669169                            | 23058584                 | 150226                   | 17654                    | 230615                           | 0.42%                     |
| 8136591A     | 45359179              | 38274323                     | 84.38%                  | 196.85                | 12780478                 | 11876388                            | 12181271                 | 106265                   | 10780                    | 482162                           | 0.49%                     |

**Table S3. Genes for classification of CRC patients from controls.**

| Ensembl ID      | Enterz ID | Gene Symbol |
|-----------------|-----------|-------------|
| ENSG00000169598 | 1677      | DFFB        |
| ENSG00000171603 | 22883     | CLSTN1      |
| ENSG00000171824 | 5394      | EXOSC10     |
| ENSG00000162490 | 374946    | DRAXIN      |
| ENSG00000236936 | NA        | NA          |
| ENSG00000162551 | 249       | ALPL        |
| ENSG00000175130 | 65108     | MARCKSL1    |
| ENSG00000142694 | 55194     | EVA1B       |
| ENSG00000196449 | 79693     | YRDC        |
| ENSG00000084072 | 10450     | PPIE        |
| ENSG00000066185 | 84217     | ZMYND12     |
| ENSG00000117448 | 10327     | AKR1A1      |
| ENSG00000142973 | 1580      | CYP4B1      |
| ENSG00000162377 | 65260     | COA7        |
| ENSG00000079739 | 5236      | PGM1        |
| ENSG00000162437 | 55225     | RAVER2      |
| ENSG00000184588 | 5142      | PDE4B       |
| ENSG00000213516 | 494115    | RBMXL1      |
| ENSG00000154451 | 115362    | GBP5        |
| ENSG00000122484 | 79871     | RPAP2       |
| ENSG00000079335 | 8556      | CDC14A      |
| ENSG00000117543 | 51611     | DPH5        |
| ENSG00000177301 | 3737      | KCNA2       |
| ENSG00000156171 | 128338    | DRAM2       |
| ENSG00000198799 | 9860      | LRIG2       |
| ENSG00000173218 | 81839     | VANGL1      |
| ENSG00000134250 | 4853      | NOTCH2      |
| ENSG00000230850 | NA        | NA          |
| ENSG00000215861 | 653513    | LOC653513   |
| ENSG00000143450 | 51686     | OAZ3        |
| ENSG00000163220 | 6280      | S100A9      |
| ENSG00000163221 | 6283      | S100A12     |
| ENSG00000158764 | 142683    | ITLN2       |
| ENSG00000143226 | 2212      | FCGR2A      |
| ENSG00000135845 | 5279      | PIGC        |
| ENSG00000234741 | 60674     | GAS5        |
| ENSG00000075391 | 9462      | RASAL2      |
| ENSG00000116668 | 54823     | SWT1        |
| ENSG00000081237 | 5788      | PTPRC       |
| ENSG00000143486 | 1939      | EIF2D       |
| ENSG00000143512 | 79802     | HHIPL2      |

| <b>Ensembl ID</b> | <b>Enterz ID</b> | <b>Gene Symbol</b> |
|-------------------|------------------|--------------------|
| ENSG00000187554   | 7100             | TLR5               |
| ENSG00000116574   | 58480            | RHOU               |
| ENSG00000010072   | 83932            | SPRTN              |
| ENSG00000059588   | 6894             | TARBP1             |
| ENSG00000151694   | 6868             | ADAM17             |
| ENSG00000084693   | 60509            | AGBL5              |
| ENSG00000213626   | 81606            | LBH                |
| ENSG00000115816   | 10153            | CEBPZ              |
| ENSG00000236213   | NA               | NA                 |
| ENSG00000119729   | 23433            | RHOQ               |
| ENSG00000232046   | 100507073        | LINC01798          |
| ENSG00000124374   | 400961           | PAIP2B             |
| ENSG00000132300   | 55037            | PTCD3              |
| ENSG00000115042   | 51011            | FAHD2A             |
| ENSG00000135945   | 51455            | REV1               |
| ENSG00000115641   | 2274             | FHL2               |
| ENSG00000175701   | 205251           | SMIM37             |
| ENSG00000125538   | 3553             | IL1B               |
| ENSG00000136709   | 55339            | WDR33              |
| ENSG00000232606   | NA               | NA                 |
| ENSG00000162980   | 26225            | ARL5A              |
| ENSG00000115165   | 9595             | CYTIP              |
| ENSG00000182263   | 55137            | FIGN               |
| ENSG00000138385   | 6741             | SSB                |
| ENSG00000224063   | NA               | NA                 |
| ENSG00000128699   | 94101            | ORMDL1             |
| ENSG00000138378   | 6775             | STAT4              |
| ENSG00000081320   | 9262             | STK17B             |
| ENSG00000240344   | 53938            | PPIL3              |
| ENSG00000204217   | 659              | BMPR2              |
| ENSG00000023228   | 4719             | NDUFS1             |
| ENSG00000115414   | 2335             | FN1                |
| ENSG00000153823   | 55022            | PID1               |
| ENSG00000066248   | 25791            | NGEF               |
| ENSG00000131375   | 23473            | CAPN7              |
| ENSG00000179152   | 285343           | TCAIM              |
| ENSG00000136068   | 2317             | FLNB               |
| ENSG00000144749   | 26018            | LRIG1              |
| ENSG00000163380   | 56203            | LMOD3              |
| ENSG00000113966   | 84100            | ARL6               |
| ENSG00000057019   | 131566           | DCBLD2             |
| ENSG00000154174   | 9868             | TOMM70             |

| <b>Ensembl ID</b> | <b>Enterz ID</b> | <b>Gene Symbol</b> |
|-------------------|------------------|--------------------|
| ENSG00000144820   | 84873            | ADGRG7             |
| ENSG00000154175   | 25890            | ABI3BP             |
| ENSG00000151576   | 79691            | QTRT2              |
| ENSG00000144843   | 141              | ADPRH              |
| ENSG00000163870   | 131601           | TPRA1              |
| ENSG00000248932   | 100507291        | LOC100507291       |
| ENSG00000198829   | 56670            | SUCNR1             |
| ENSG00000114416   | 8087             | FXR1               |
| ENSG00000244405   | 2119             | ETV5               |
| ENSG00000168824   | 27065            | NSG1               |
| ENSG00000152990   | 166647           | ADGRA3             |
| ENSG00000038210   | 55300            | PI4K2B             |
| ENSG00000109814   | 7358             | UGDH               |
| ENSG00000249348   | 100885776        | UGDH-AS1           |
| ENSG00000173597   | 27284            | SULT1B1            |
| ENSG00000163104   | 56916            | SMARCAD1           |
| ENSG00000164038   | 133308           | SLC9B2             |
| ENSG00000164022   | 9255             | AIMP1              |
| ENSG00000172399   | 51778            | MYOZ2              |
| ENSG00000245958   | 645513           | LOC645513          |
| ENSG00000164168   | 55751            | TMEM184C           |
| ENSG00000129116   | 23022            | PALLD              |
| ENSG00000109586   | 51809            | GALNT7             |
| ENSG00000213430   | NA               | NA                 |
| ENSG00000113460   | 55299            | BRIX1              |
| ENSG00000067113   | 8611             | PLPP1              |
| ENSG00000164512   | 79722            | ANKRD55            |
| ENSG00000086189   | 27292            | DIMT1              |
| ENSG00000113593   | 23398            | PPWD1              |
| ENSG00000113595   | 373              | TRIM23             |
| ENSG00000122012   | 22987            | SV2C               |
| ENSG00000152413   | 9456             | HOMER1             |
| ENSG00000247828   | 100505894        | TMEM161B-AS1       |
| ENSG00000081189   | 4208             | MEF2C              |
| ENSG00000164307   | 51752            | ERAP1              |
| ENSG00000174136   | 285704           | RGMB               |
| ENSG00000129595   | 64097            | EPB41L4A           |
| ENSG00000145779   | 25816            | TNFAIP8            |
| ENSG00000244921   | NA               | NA                 |
| ENSG00000120314   | 54853            | WDR55              |
| ENSG00000070814   | 6949             | TCOF1              |

| <b>Ensembl ID</b> | <b>Enterz ID</b> | <b>Gene Symbol</b> |
|-------------------|------------------|--------------------|
| ENSG00000131459   | 9945             | GFPT2              |
| ENSG00000145982   | 10667            | FARS2              |
| ENSG00000238221   | NA               | NA                 |
| ENSG00000111843   | 51522            | TMEM14C            |
| ENSG00000112186   | 10486            | CAP2               |
| ENSG00000112304   | 55856            | ACOT13             |
| ENSG00000146109   | 29777            | ABT1               |
| ENSG00000096654   | 7738             | ZNF184             |
| ENSG00000204475   | 259197           | NCR3               |
| ENSG00000250535   | NA               | NA                 |
| ENSG00000204287   | 3122             | HLA-DRA            |
| ENSG00000170734   | 5429             | POLH               |
| ENSG00000180992   | 64928            | MRPL14             |
| ENSG00000112742   | 7272             | TTK                |
| ENSG00000013375   | 5238             | PGM3               |
| ENSG00000111880   | 8732             | RNGTT              |
| ENSG00000132423   | 51805            | COQ3               |
| ENSG00000112297   | 202              | CRYBG1             |
| ENSG00000196591   | 3066             | HDAC2              |
| ENSG00000188820   | 441168           | CALHM6             |
| ENSG00000234117   | NA               | NA                 |
| ENSG00000047932   | 57120            | GOPC               |
| ENSG00000196569   | 3908             | LAMA2              |
| ENSG00000079819   | 2037             | EPB41L2            |
| ENSG00000118503   | 7128             | TNFAIP3            |
| ENSG00000120254   | 25902            | MTHFD1L            |
| ENSG00000092820   | 7430             | EZR                |
| ENSG00000197081   | 3482             | IGF2R              |
| ENSG00000184465   | 253769           | WDR27              |
| ENSG00000164916   | 221937           | FOXK1              |
| ENSG00000136261   | 28969            | BZW2               |
| ENSG00000136237   | 9771             | RAPGEF5            |
| ENSG00000153814   | 221895           | JAZF1              |
| ENSG00000105778   | 23080            | AVL9               |
| ENSG00000211699   | NA               | NA                 |
| ENSG00000214765   | 641977           | SEPT7P2            |
| ENSG00000198039   | 10793            | ZNF273             |
| ENSG00000223473   | NA               | NA                 |
| ENSG00000106638   | 26608            | TBL2               |
| ENSG00000214293   | 100505854        | APTR               |
| ENSG00000205413   | 54809            | SAMD9              |
| ENSG00000066923   | 10734            | STAG3              |

| <b>Ensembl ID</b> | <b>Enterz ID</b> | <b>Gene Symbol</b> |
|-------------------|------------------|--------------------|
| ENSG00000230257   | 58160            | NFE4               |
| ENSG00000184408   | 3751             | KCND2              |
| ENSG00000128513   | 25913            | POT1               |
| ENSG00000158623   | 26958            | COPG2              |
| ENSG00000244479   | NA               | NA                 |
| ENSG00000106526   | 653857           | ACTR3C             |
| ENSG00000213203   | 170575           | GIMAP1             |
| ENSG00000241735   | 220832           | FABP5P3            |
| ENSG00000124343   | 7499             | XG                 |
| ENSG00000102048   | 140462           | ASB9               |
| ENSG00000102010   | 660              | BMX                |
| ENSG00000165168   | 1536             | CYBB               |
| ENSG00000102103   | 10084            | PQBP1              |
| ENSG00000204466   | NA               | NA                 |
| ENSG00000158578   | 212              | ALAS2              |
| ENSG00000082458   | 1741             | DLG3               |
| ENSG00000147164   | 29934            | SNX12              |
| ENSG00000165259   | 139324           | HDX                |
| ENSG00000179083   | 286499           | FAM133A            |
| ENSG00000158427   | 286527           | TMSB15B            |
| ENSG00000232160   | 101928578        | RAP2C-AS1          |
| ENSG00000182319   | NA               | NA                 |
| ENSG00000175445   | 4023             | LPL                |
| ENSG00000158863   | 64760            | FAM160B2           |
| ENSG00000147535   | 84513            | PLPP5              |
| ENSG00000047249   | 51606            | ATP6V1H            |
| ENSG00000147570   | 85479            | DNAJC5B            |
| ENSG00000164751   | 5828             | PEX2               |
| ENSG00000254266   | 101927003        | PKIA-AS1           |
| ENSG00000237264   | NA               | NA                 |
| ENSG00000155100   | 51633            | OTUD6B             |
| ENSG00000120963   | 51123            | ZNF706             |
| ENSG00000246263   | 101927221        | UBR5-AS1           |
| ENSG00000164929   | 79870            | BAALC              |
| ENSG00000164935   | 81501            | DCSTAMP            |
| ENSG00000172167   | 27085            | MTBP               |
| ENSG00000170881   | 11236            | RNF139             |
| ENSG00000042832   | 7038             | TG                 |
| ENSG00000155926   | 6503             | SLA                |
| ENSG00000178685   | 84875            | PARP10             |
| ENSG00000137103   | 51754            | TMEM8B             |
| ENSG00000135048   | 23670            | CEMIP2             |



| <b>Ensembl ID</b> | <b>Enterz ID</b> | <b>Gene Symbol</b> |
|-------------------|------------------|--------------------|
| ENSG00000148019   | 84131            | CEP78              |
| ENSG00000119522   | 57706            | DENND1A            |
| ENSG00000136878   | 10868            | USP20              |
| ENSG00000148296   | 6838             | SURF6              |
| ENSG00000172889   | 51162            | EGFL7              |
| ENSG00000197070   | 92714            | ARRDC1             |
| ENSG00000134461   | 54522            | ANKRD16            |
| ENSG00000134470   | 3601             | IL15RA             |
| ENSG00000152457   | 64421            | DCLRE1C            |
| ENSG00000165983   | 9317             | PTER               |
| ENSG00000180592   | 387640           | SKIDA1             |
| ENSG00000175395   | 219749           | ZNF25              |
| ENSG00000151151   | 253430           | IPMK               |
| ENSG00000221817   | 101929145        | PPP3CB-AS1         |
| ENSG00000172586   | 118487           | CHCHD1             |
| ENSG00000156110   | 132              | ADK                |
| ENSG00000148655   | 83938            | LRMDA              |
| ENSG00000173124   | 142827           | ACSM6              |
| ENSG00000138185   | 953              | ENTPD1             |
| ENSG00000226688   | 728558           | ENTPD1-AS1         |
| ENSG00000177853   | 9849             | ZNF518A            |
| ENSG00000077150   | 4791             | NFKB2              |
| ENSG00000119927   | 57678            | GPAM               |
| ENSG00000198924   | 9937             | DCLRE1A            |
| ENSG00000165669   | 63877            | FAM204A            |
| ENSG00000183605   | 119559           | SFXN4              |
| ENSG00000165672   | 10935            | PRDX3              |
| ENSG00000179988   | 118672           | PSTK               |
| ENSG00000142089   | 10410            | IFITM3             |
| ENSG00000269821   | 10984            | KCNQ1OT1           |
| ENSG00000196565   | 3048             | HBG2               |
| ENSG00000171714   | 203859           | ANO5               |
| ENSG00000205213   | 55366            | LGR4               |
| ENSG00000176697   | 627              | BDNF               |
| ENSG00000109911   | 26610            | ELP4               |
| ENSG00000186714   | 493860           | CCDC73             |
| ENSG00000254879   | NA               | NA                 |
| ENSG00000255189   | NA               | NA                 |
| ENSG00000197629   | 219972           | MPEG1              |
| ENSG00000162227   | 10629            | TAF6L              |
| ENSG00000173457   | 26472            | PPP1R14B           |
| ENSG00000014138   | 23649            | POLA2              |

| Ensembl ID      | Enterz ID | Gene Symbol |
|-----------------|-----------|-------------|
| ENSG00000173442 | 254102    | EHBP1L1     |
| ENSG00000173039 | 5970      | RELA        |
| ENSG00000172922 | 84153     | RNASEH2C    |
| ENSG00000087365 | 10992     | SF3B2       |
| ENSG00000175634 | 6199      | RPS6KB2     |
| ENSG00000184154 | 220074    | LRTOMT      |
| ENSG00000241170 | NA        | NA          |
| ENSG00000254429 | NA        | NA          |
| ENSG00000149257 | 871       | SERPINH1    |
| ENSG00000137507 | 2615      | LRRC32      |
| ENSG00000227376 | NA        | NA          |
| ENSG00000165490 | 220042    | DDIAS       |
| ENSG00000042429 | 9440      | MED17       |
| ENSG00000137693 | 10413     | YAP1        |
| ENSG00000150768 | 1737      | DLAT        |
| ENSG00000150776 | 55216     | NKAPD1      |
| ENSG00000166741 | 4837      | NNMT        |
| ENSG00000186174 | 283149    | BCL9L       |
| ENSG00000186166 | 338657    | CCDC84      |
| ENSG00000064309 | 50937     | CDON        |
| ENSG00000002016 | 5893      | RAD52       |
| ENSG00000255775 | NA        | NA          |
| ENSG00000010278 | 928       | CD9         |
| ENSG00000250510 | 27239     | GPR162      |
| ENSG00000260423 | 101930452 | LINC02367   |
| ENSG00000139112 | 23710     | GABARAPL1   |
| ENSG00000084444 | 57613     | FAM234B     |
| ENSG00000151490 | 5800      | PTPRO       |
| ENSG00000111713 | 2998      | GYS2        |
| ENSG00000256377 | NA        | NA          |
| ENSG00000139567 | 94        | ACVRL1      |
| ENSG00000111077 | 23371     | TNS2        |
| ENSG00000181852 | 10193     | RNF41       |
| ENSG00000123329 | 64333     | ARHGAP9     |
| ENSG00000177990 | 283417    | DPY19L2     |
| ENSG00000090382 | 4069      | LYZ         |
| ENSG00000180881 | 84698     | CAPS2       |
| ENSG00000136040 | 10154     | PLXNC1      |
| ENSG00000111144 | 4048      | LTA4H       |
| ENSG00000135127 | 92558     | BICDL1      |
| ENSG00000257218 | 283459    | GATC        |
| ENSG00000135124 | 5025      | P2RX4       |

| <b>Ensembl ID</b> | <b>Enterz ID</b> | <b>Gene Symbol</b> |
|-------------------|------------------|--------------------|
| ENSG00000170633   | 80196            | RNF34              |
| ENSG00000033030   | 55596            | ZCCHC8             |
| ENSG00000234152   | NA               | NA                 |
| ENSG00000139517   | 222484           | LNX2               |
| ENSG00000102738   | 10240            | MRPS31             |
| ENSG00000023516   | 11215            | AKAP11             |
| ENSG00000152213   | 115761           | ARL11              |
| ENSG00000231607   | 8847             | DLEU2              |
| ENSG00000188243   | 170622           | COMMD6             |
| ENSG00000139746   | 64062            | RBM26              |
| ENSG00000228889   | 100289373        | UBAC2-AS1          |
| ENSG00000175198   | 5095             | PCCA               |
| ENSG00000100814   | 57820            | CCNB1IP1           |
| ENSG00000165819   | 56339            | METTL3             |
| ENSG00000100813   | 22985            | ACIN1              |
| ENSG00000215277   | 100507650        | RNF212B            |
| ENSG00000215271   | 57594            | HOMEZ              |
| ENSG00000186648   | 90668            | CARMIL3            |
| ENSG00000100911   | 5721             | PSME2              |
| ENSG00000092098   | 55072            | RNF31              |
| ENSG00000100916   | 84312            | BRMS1L             |
| ENSG00000198513   | 51062            | ATL1               |
| ENSG00000198554   | 11169            | WDHD1              |
| ENSG00000131981   | 3958             | LGALS3             |
| ENSG00000139946   | 57161            | PELI2              |
| ENSG00000126785   | 57381            | RHOJ               |
| ENSG00000119596   | 56252            | YLPM1              |
| ENSG00000197249   | 5265             | SERPINA1           |
| ENSG00000198690   | 22909            | FAN1               |
| ENSG00000103994   | 64397            | ZNF106             |
| ENSG00000104177   | 50804            | MYEF2              |
| ENSG00000166477   | 123169           | LEO1               |
| ENSG00000103599   | 64799            | IQCH               |
| ENSG00000178802   | 4351             | MPI                |
| ENSG00000178761   | 57184            | FAM219B            |
| ENSG00000198794   | 192683           | SCAMP5             |
| ENSG00000140398   | 79661            | NEIL1              |
| ENSG00000167196   | 26263            | FBXO22             |
| ENSG00000140391   | 10099            | TSPAN3             |
| ENSG00000180953   | 400410           | ST20               |
| ENSG00000188659   | 283726           | SAXO2              |
| ENSG00000131876   | 6627             | SNRPA1             |

| Ensembl ID      | Enterz ID | Gene Symbol |
|-----------------|-----------|-------------|
| ENSG00000238098 | 650655    | ABCA17P     |
| ENSG00000131652 | 79228     | THOC6       |
| ENSG00000162086 | 7627      | ZNF75A      |
| ENSG00000089486 | 29965     | CDIP1       |
| ENSG00000179889 | 23042     | PDXDC1      |
| ENSG00000058600 | 55718     | POLR3E      |
| ENSG00000188603 | 1201      | CLN3        |
| ENSG00000261239 | NA        | NA          |
| ENSG00000171241 | 79801     | SHCBP1      |
| ENSG00000121281 | 113       | ADCY7       |
| ENSG00000125148 | 4502      | MT2A        |
| ENSG00000135736 | 92922     | CCDC102A    |
| ENSG00000185669 | 333929    | SNAI3       |
| ENSG00000185324 | 8558      | CDK10       |
| ENSG00000187741 | 2175      | FANCA       |
| ENSG00000167720 | 63826     | SRR         |
| ENSG00000141258 | 9905      | SGSM2       |
| ENSG00000040531 | 1497      | CTNS        |
| ENSG00000182557 | 201305    | SPNS3       |
| ENSG00000167842 | 79003     | MIS12       |
| ENSG00000011295 | 54902     | TTC19       |
| ENSG00000226478 | NA        | NA          |
| ENSG00000109084 | 27346     | TMEM97      |
| ENSG00000108733 | 5193      | PEX12       |
| ENSG00000172660 | NA        | NA          |
| ENSG00000224298 | NA        | NA          |
| ENSG00000141140 | NA        | NA          |
| ENSG00000108753 | NA        | NA          |
| ENSG00000125691 | 9349      | RPL23       |
| ENSG00000173786 | 1267      | CNP         |
| ENSG00000184922 | 752       | FMNL1       |
| ENSG00000167107 | 80221     | ACSF2       |
| ENSG00000006282 | 64847     | SPATA20     |
| ENSG00000121057 | 8165      | AKAP1       |
| ENSG00000008283 | 1534      | CYB561      |
| ENSG00000186665 | 284018    | C17orf58    |
| ENSG00000266714 | 80022     | MYO15B      |
| ENSG00000214140 | 768206    | PRCD        |
| ENSG00000163597 | 100507246 | SNHG16      |
| ENSG00000262873 | NA        | NA          |
| ENSG00000176155 | 284001    | CCDC57      |
| ENSG00000176890 | 7298      | TYMS        |

| <b>Ensembl ID</b> | <b>Enterz ID</b> | <b>Gene Symbol</b> |
|-------------------|------------------|--------------------|
| ENSG00000132199   | 55556            | ENOSF1             |
| ENSG00000264235   | 104968399        | LOC104968399       |
| ENSG00000154655   | 91133            | L3MBTL4            |
| ENSG00000264876   | NA               | NA                 |
| ENSG00000154856   | 147495           | APCDD1             |
| ENSG00000177150   | 125228           | FAM210A            |
| ENSG00000141446   | 114799           | ESCO1              |
| ENSG00000101773   | 5932             | RBBP8              |
| ENSG00000134508   | 91768            | CABLES1            |
| ENSG00000134042   | 83876            | MRO                |
| ENSG00000166634   | 89777            | SERPINB12          |
| ENSG00000213742   | 102724826        | ZNF337-AS1         |
| ENSG00000125967   | 63941            | NECAB3             |
| ENSG00000080845   | 22839            | DLGAP4             |
| ENSG00000196562   | 55959            | SULF2              |
| ENSG00000124243   | 55653            | BCAS4              |
| ENSG00000124224   | NA               | NA                 |
| ENSG00000171469   | 93134            | ZNF561             |
| ENSG00000223547   | 284391           | ZNF844             |
| ENSG00000268278   | NA               | NA                 |
| ENSG00000213971   | NA               | NA                 |
| ENSG00000198453   | 374900           | ZNF568             |
| ENSG00000086544   | 80271            | ITPKC              |
| ENSG00000105755   | 23474            | ETHE1              |
| ENSG00000169169   | 126129           | CPT1C              |
| ENSG00000104960   | 53635            | PTOV1              |
| ENSG00000161551   | 84765            | ZNF577             |
| ENSG00000170954   | 55786            | ZNF415             |
| ENSG00000167615   | 114823           | LENG8              |
| ENSG00000104972   | 10859            | LILRB1             |
| ENSG00000133247   | 84787            | KMT5C              |
| ENSG00000178935   | 79818            | ZNF552             |
| ENSG00000099725   | 5616             | PRKY               |
| ENSG00000184979   | 11274            | USP18              |
| ENSG00000099977   | 1652             | DDT                |
| ENSG00000178026   | 388886           | LRRC75B            |
| ENSG00000225465   | NA               | NA                 |
| ENSG00000183530   | 253143           | PRR14L             |
| ENSG00000133466   | 114904           | C1QTNF6            |
| ENSG00000100079   | 3957             | LGALS2             |
| ENSG00000184381   | 8398             | PLA2G6             |
| ENSG00000243811   | 140564           | APOBEC3D           |

| <b>Ensembl ID</b> | <b>Enterz ID</b> | <b>Gene Symbol</b> |
|-------------------|------------------|--------------------|
| ENSG00000186976   | 64800            | EFCAB6             |
| ENSG00000138964   | 64098            | PARVG              |
| ENSG00000160191   | 5152             | PDE9A              |
| ENSG00000183250   | 84536            | LINC01547          |
| ENSG00000248527   | NA               | NA                 |
| ENSG00000179403   | 64856            | VWA1               |
| ENSG00000116251   | 6146             | RPL22              |
| ENSG00000171735   | 23261            | CAMTA1             |
| ENSG00000116288   | 11315            | PARK7              |
| ENSG00000142634   | 79180            | EFHD2              |
| ENSG00000132881   | 79363            | CPLANE2            |
| ENSG00000127481   | 23352            | UBR4               |
| ENSG00000090686   | 84196            | USP48              |
| ENSG00000142798   | 3339             | HSPG2              |
| ENSG00000204219   | 6920             | TCEA3              |
| ENSG00000117318   | 3399             | ID3                |
| ENSG00000188672   | 6006             | RHCE               |
| ENSG00000131914   | 79727            | LIN28A             |
| ENSG00000204160   | 84243            | ZDHHC18            |
| ENSG00000130768   | 27293            | SMPDL3B            |
| ENSG00000182866   | 3932             | LCK                |
| ENSG00000065978   | 4904             | YBX1               |
| ENSG00000117399   | 991              | CDC20              |
| ENSG00000117410   | 533              | ATP6V0B            |
| ENSG00000117472   | 10103            | TSPAN1             |
| ENSG00000173660   | 7388             | UQCRH              |
| ENSG00000232022   | NA               | NA                 |
| ENSG00000117834   | 200010           | SLC5A9             |
| ENSG00000203356   | 105378716        | LINC01562          |
| ENSG00000177606   | 3725             | JUN                |
| ENSG00000237928   | 100996570        | NFIA-AS2           |
| ENSG00000132849   | 10207            | PATJ               |
| ENSG00000240563   | 54596            | L1TD1              |
| ENSG00000237726   | NA               | NA                 |
| ENSG00000162620   | 127255           | LRRIQ3             |
| ENSG00000142875   | 5567             | PRKACB             |
| ENSG00000162643   | 126820           | WDR63              |
| ENSG00000162695   | 148867           | SLC30A7            |
| ENSG00000116266   | 6814             | STXBP3             |
| ENSG00000143126   | 1952             | CELSR2             |
| ENSG00000143093   | 85369            | STRIP1             |
| ENSG00000198765   | 6847             | SYCP1              |

| <b>Ensembl ID</b> | <b>Enterz ID</b> | <b>Gene Symbol</b> |
|-------------------|------------------|--------------------|
| ENSG00000163399   | 476              | ATP1A1             |
| ENSG00000183508   | 54855            | FAM46C             |
| ENSG00000134193   | 83998            | REG4               |
| ENSG00000143537   | 8751             | ADAM15             |
| ENSG00000143248   | 8490             | RGS5               |
| ENSG00000224286   | 284688           | LINC01142          |
| ENSG00000197959   | 26052            | DNM3               |
| ENSG00000162779   | 126859           | AXDND1             |
| ENSG00000162782   | 163589           | TDRD5              |
| ENSG00000143337   | 26092            | TOR1AIP1           |
| ENSG00000162704   | 10092            | ARPC5              |
| ENSG00000000971   | 3075             | CFH                |
| ENSG00000214796   | NA               | NA                 |
| ENSG00000133048   | 1116             | CHI3L1             |
| ENSG00000133065   | 254428           | SLC41A1            |
| ENSG00000143502   | 55061            | SUSD4              |
| ENSG00000162923   | 80232            | WDR26              |
| ENSG00000135773   | 10753            | CAPN9              |
| ENSG00000116991   | 57568            | SIPA1L2            |
| ENSG00000119285   | 55127            | HEATR1             |
| ENSG00000162843   | 128025           | WDR64              |
| ENSG00000162852   | 163882           | CNST               |
| ENSG00000171863   | 6201             | RPS7               |
| ENSG00000235092   | 100506299        | ID2-AS1            |
| ENSG00000143797   | 129642           | MBOAT2             |
| ENSG00000224400   | NA               | NA                 |
| ENSG00000119801   | 51646            | YPEL5              |
| ENSG00000169564   | 5093             | PCBP1              |
| ENSG00000183733   | 344018           | FIGLA              |
| ENSG00000243264   | NA               | NA                 |
| ENSG00000241244   | NA               | NA                 |
| ENSG00000211633   | NA               | NA                 |
| ENSG00000168754   | 51252            | FAM178B            |
| ENSG00000168658   | 200403           | VWA3B              |
| ENSG00000072163   | 55679            | LIMS2              |
| ENSG00000168702   | 53353            | LRP1B              |
| ENSG00000150556   | 130576           | LYPD6B             |
| ENSG00000115183   | 85461            | TANC1              |
| ENSG00000144285   | 6323             | SCN1A              |
| ENSG00000138382   | 29081            | METTL5             |
| ENSG00000071967   | 79901            | CYBRD1             |
| ENSG00000138448   | 3685             | ITGAV              |

| <b>Ensembl ID</b> | <b>Enterz ID</b> | <b>Gene Symbol</b> |
|-------------------|------------------|--------------------|
| ENSG00000168542   | 1281             | COL3A1             |
| ENSG00000128641   | 4430             | MYO1B              |
| ENSG00000237525   | NA               | NA                 |
| ENSG00000124006   | 23363            | OBSL1              |
| ENSG00000116106   | 2043             | EPHA4              |
| ENSG00000115009   | 6364             | CCL20              |
| ENSG00000124831   | 9208             | LRRFIP1            |
| ENSG00000065802   | 51665            | ASB1               |
| ENSG00000196277   | 2917             | GRM7               |
| ENSG00000144713   | 6161             | RPL32              |
| ENSG00000170876   | 79188            | TMEM43             |
| ENSG00000174748   | 6138             | RPL15              |
| ENSG00000091317   | 54918            | CMTM6              |
| ENSG00000168028   | 3921             | RPSA               |
| ENSG00000188846   | 9045             | RPL14              |
| ENSG00000172037   | 3913             | LAMB2              |
| ENSG00000224479   | NA               | NA                 |
| ENSG00000183662   | 407738           | FAM19A1            |
| ENSG00000144746   | 10550            | ARL6IP5            |
| ENSG00000244674   | NA               | NA                 |
| ENSG00000114455   | 11148            | HHLA2              |
| ENSG00000144821   | 22989            | MYH15              |
| ENSG00000240893   | 101929694        | LINC02042          |
| ENSG00000031081   | 57514            | ARHGAP31           |
| ENSG00000173706   | 57493            | HEG1               |
| ENSG00000181804   | 285195           | SLC9A9             |
| ENSG00000120742   | 27230            | SERP1              |
| ENSG00000181631   | 53829            | P2RY13             |
| ENSG00000152580   | 285313           | IGSF10             |
| ENSG00000244268   | NA               | NA                 |
| ENSG00000237787   | NA               | NA                 |
| ENSG00000114204   | 5276             | SERPINI2           |
| ENSG00000240292   | NA               | NA                 |
| ENSG00000213123   | 255758           | TCTEX1D2           |
| ENSG00000182903   | 170960           | ZNF721             |
| ENSG00000163945   | 57654            | UVSSA              |
| ENSG00000071127   | 9948             | WDR1               |
| ENSG00000163257   | 54876            | DCAF16             |
| ENSG00000109805   | 64151            | NCAPG              |
| ENSG00000250038   | NA               | NA                 |
| ENSG00000078140   | 3093             | UBE2K              |
| ENSG00000064042   | 22998            | LIMCH1             |



| Ensembl ID      | Enterz ID | Gene Symbol |
|-----------------|-----------|-------------|
| ENSG00000250657 | NA        | NA          |
| ENSG00000163285 | 2565      | GABRG1      |
| ENSG00000145321 | 2638      | GC          |
| ENSG00000124875 | 6372      | CXCL6       |
| ENSG00000260265 | NA        | NA          |
| ENSG00000156194 | 5470      | PPEF2       |
| ENSG00000138758 | 55752     | 11-Sep      |
| ENSG00000145332 | 57563     | KLHL8       |
| ENSG00000187653 | NA        | NA          |
| ENSG00000153064 | 55024     | BANK1       |
| ENSG00000248373 | NA        | NA          |
| ENSG00000205403 | 3426      | CFI         |
| ENSG00000164096 | 401152    | C4orf3      |
| ENSG00000196159 | 79633     | FAT4        |
| ENSG00000153132 | 1047      | CLGN        |
| ENSG00000171557 | 2266      | FGG         |
| ENSG00000151790 | 6999      | TDO2        |
| ENSG00000145476 | 285440    | CYP4V2      |
| ENSG00000145494 | 4726      | NDUFS6      |
| ENSG00000133398 | 84246     | MED10       |
| ENSG00000248294 | NA        | NA          |
| ENSG00000226259 | NA        | NA          |
| ENSG00000157111 | 134285    | TMEM171     |
| ENSG00000164347 | 84340     | GFM2        |
| ENSG00000189127 | 340120    | ANKRD34B    |
| ENSG00000172497 | 134526    | ACOT12      |
| ENSG00000152348 | 83734     | ATG10       |
| ENSG00000145715 | 5921      | RASA1       |
| ENSG00000145777 | 85480     | TSLP        |
| ENSG00000152503 | 55521     | TRIM36      |
| ENSG00000168916 | 57507     | ZNF608      |
| ENSG00000238160 | NA        | NA          |
| ENSG00000249119 | NA        | NA          |
| ENSG00000248923 | NA        | NA          |
| ENSG00000120727 | 51247     | PAIP2       |
| ENSG00000113140 | 6678      | SPARC       |
| ENSG00000155511 | 2890      | GRIA1       |
| ENSG00000022355 | 2554      | GABRA1      |
| ENSG00000113240 | 57396     | CLK4        |
| ENSG00000176783 | 80230     | RUFY1       |
| ENSG00000153046 | 9425      | CDYL        |
| ENSG00000124491 | 2162      | F13A1       |

| <b>Ensembl ID</b> | <b>Enterz ID</b> | <b>Gene Symbol</b> |
|-------------------|------------------|--------------------|
| ENSG00000096696   | 1832             | DSP                |
| ENSG00000230939   | NA               | NA                 |
| ENSG00000146038   | 51473            | DCDC2              |
| ENSG00000180596   | 8347             | HIST1H2BC          |
| ENSG00000180573   | 8334             | HIST1H2AC          |
| ENSG00000158373   | 3017             | HIST1H2BD          |
| ENSG00000168274   | NA               | NA                 |
| ENSG00000124557   | 696              | BTN1A1             |
| ENSG00000225173   | NA               | NA                 |
| ENSG00000213722   | 23564            | DDAH2              |
| ENSG00000204386   | 4758             | NEU1               |
| ENSG00000231500   | 6222             | RPS18              |
| ENSG00000204220   | 10471            | PFDN6              |
| ENSG00000096433   | 3710             | ITPR3              |
| ENSG00000112164   | 2740             | GLP1R              |
| ENSG00000188056   | 285852           | TREML4             |
| ENSG00000124733   | 4201             | MEA1               |
| ENSG00000096006   | 10321            | CRISP3             |
| ENSG00000079841   | 22999            | RIMS1              |
| ENSG00000186231   | 114792           | KLHL32             |
| ENSG00000155130   | NA               | NA                 |
| ENSG00000203760   | 387103           | CENPW              |
| ENSG00000028839   | 9519             | TBPL1              |
| ENSG00000225177   | NA               | NA                 |
| ENSG00000131016   | 9590             | AKAP12             |
| ENSG00000130338   | 56995            | TULP4              |
| ENSG00000112096   | 6648             | SOD2               |
| ENSG00000272549   | 401286           | LINC02538          |
| ENSG00000223855   | 441307           | HRAT92             |
| ENSG00000236039   | 101927630        | LOC101927630       |
| ENSG00000271133   | 101927811        | LOC101927811       |
| ENSG00000136231   | 10643            | IGF2BP3            |
| ENSG00000105926   | 51678            | MPP6               |
| ENSG00000180354   | 222166           | MTURN              |
| ENSG00000122643   | 51251            | NT5C3A             |
| ENSG00000106624   | 165              | AEBP1              |
| ENSG00000106078   | 23242            | COBL               |
| ENSG00000129103   | 25870            | SUMF2              |
| ENSG00000006704   | 9569             | GTF2IRD1           |
| ENSG00000188175   | 253012           | HEPACAM2           |
| ENSG00000160862   | 563              | AZGP1              |
| ENSG00000197093   | 79690            | GAL3ST4            |

| <b>Ensembl ID</b> | <b>Enterz ID</b> | <b>Gene Symbol</b> |
|-------------------|------------------|--------------------|
| ENSG00000091136   | 3912             | LAMB1              |
| ENSG00000128585   | 4289             | MKLN1              |
| ENSG00000240268   | 100289017        | MOXD2P             |
| ENSG00000127377   | 155051           | CRYGN              |
| ENSG00000105983   | 64327            | LMBR1              |
| ENSG00000205542   | 7114             | TMSB4X             |
| ENSG00000147003   | 57393            | CLTRN              |
| ENSG00000177324   | 139105           | BEND2              |
| ENSG00000184368   | 256714           | MAP7D2             |
| ENSG00000047597   | 7504             | XK                 |
| ENSG00000147113   | 79742            | CXorf36            |
| ENSG00000102265   | 7076             | TIMP1              |
| ENSG00000234068   | 203569           | PAGE2              |
| ENSG00000102053   | 340554           | ZC3H12B            |
| ENSG00000230629   | NA               | NA                 |
| ENSG00000225470   | 554203           | JPX                |
| ENSG00000131171   | 6451             | SH3BGRL            |
| ENSG00000184867   | 9823             | ARMCX2             |
| ENSG00000198932   | 9737             | GPRASP1            |
| ENSG00000133131   | 79710            | MORC4              |
| ENSG00000101842   | 340547           | VSIG1              |
| ENSG00000131724   | 3597             | IL13RA1            |
| ENSG00000175556   | 79836            | LONRF3             |
| ENSG00000125356   | 4694             | NDUFA1             |
| ENSG00000125676   | 57187            | THOC2              |
| ENSG00000134590   | 8933             | RTL8C              |
| ENSG00000147378   | 89885            | FATE1              |
| ENSG00000130830   | 4354             | MPP1               |
| ENSG00000180190   | 157695           | TDRP               |
| ENSG00000164821   | 1669             | DEFA4              |
| ENSG00000254235   | 157273           | LOC157273          |
| ENSG00000164733   | 1508             | CTSB               |
| ENSG00000253490   | 101929450        | LINC02099          |
| ENSG00000133872   | 51669            | SARAF              |
| ENSG00000129691   | 9070             | ASH2L              |
| ENSG00000255101   | NA               | NA                 |
| ENSG00000147485   | 137902           | PXDNL              |
| ENSG00000254006   | NA               | NA                 |
| ENSG00000245910   | 641638           | SNHG6              |
| ENSG00000040341   | 27067            | STAU2              |
| ENSG00000104435   | 11075            | STMN2              |
| ENSG00000251136   | 101929709        | LOC101929709       |

| <b>Ensembl ID</b> | <b>Enterz ID</b> | <b>Gene Symbol</b> |
|-------------------|------------------|--------------------|
| ENSG00000248858   | 441369           | FLJ46284           |
| ENSG00000253197   | NA               | NA                 |
| ENSG00000254224   | NA               | NA                 |
| ENSG00000132561   | 4147             | MATN2              |
| ENSG00000164924   | 7534             | YWHAZ              |
| ENSG00000172164   | 6641             | SNTB1              |
| ENSG00000255080   | NA               | NA                 |
| ENSG00000173334   | 10221            | TRIB1              |
| ENSG00000153310   | 51571            | FAM49B             |
| ENSG00000008513   | 6482             | ST3GAL1            |
| ENSG00000107020   | 55848            | PLGRKT             |
| ENSG00000107165   | 7306             | TYRP1              |
| ENSG00000107186   | 8777             | MPDZ               |
| ENSG00000044459   | 54875            | CNTLN              |
| ENSG00000230453   | 441459           | ANKRD18B           |
| ENSG00000172159   | 257019           | FRMD3              |
| ENSG00000254473   | 105376114        | LOC105376114       |
| ENSG00000197506   | 64078            | SLC28A3            |
| ENSG00000131669   | 4814             | NINJ1              |
| ENSG00000136938   | 10541            | ANP32B             |
| ENSG00000106771   | 23731            | TMEM245            |
| ENSG00000119411   | 54836            | BSPRY              |
| ENSG00000041982   | 3371             | TNC                |
| ENSG00000148175   | 2040             | STOM               |
| ENSG00000148358   | 57720            | GPR107             |
| ENSG00000050555   | 10319            | LAMC3              |
| ENSG00000235106   | 266655           | BRD3OS             |
| ENSG00000122140   | 51116            | MRPS2              |
| ENSG00000184925   | 286256           | LCN12              |
| ENSG00000235281   | NA               | NA                 |
| ENSG00000077327   | 9576             | SPAG6              |
| ENSG00000229932   | NA               | NA                 |
| ENSG00000151023   | 219670           | ENKUR              |
| ENSG00000095777   | 53904            | MYO3A              |
| ENSG00000151033   | 119180           | LYZL2              |
| ENSG00000170759   | 3799             | KIF5B              |
| ENSG00000150093   | 3688             | ITGB1              |
| ENSG00000165512   | 7570             | ZNF22              |
| ENSG00000165633   | 196740           | VSTM4              |
| ENSG00000108176   | 56521            | DNAJC12            |
| ENSG00000095585   | 29760            | BLNK               |
| ENSG00000203867   | 282996           | RBM20              |

| <b>Ensembl ID</b> | <b>Enterz ID</b> | <b>Gene Symbol</b> |
|-------------------|------------------|--------------------|
| ENSG00000108061   | 8036             | SHOC2              |
| ENSG00000148908   | 6001             | RGS10              |
| ENSG00000176769   | 256536           | TCERG1L            |
| ENSG00000177106   | 64787            | EPS8L2             |
| ENSG00000110169   | 3263             | HPX                |
| ENSG00000166340   | 1200             | TPP1               |
| ENSG00000166796   | 3948             | LDHC               |
| ENSG00000165970   | 9152             | SLC6A5             |
| ENSG00000121621   | 81930            | KIF18A             |
| ENSG00000085063   | 966              | CD59               |
| ENSG00000149115   | 85456            | TNKS1BP1           |
| ENSG00000134827   | 6947             | TCN1               |
| ENSG00000149534   | 2206             | MS4A2              |
| ENSG00000110079   | 51338            | MS4A4A             |
| ENSG00000124942   | 79026            | AHNAK              |
| ENSG00000175550   | 10589            | DRAP1              |
| ENSG00000174080   | 8722             | CTSF               |
| ENSG00000255980   | NA               | NA                 |
| ENSG00000131626   | 8500             | PPFIA1             |
| ENSG00000110237   | 9828             | ARHGEF17           |
| ENSG00000175582   | 5870             | RAB6A              |
| ENSG00000137491   | 11309            | SLCO2B1            |
| ENSG00000215504   | NA               | NA                 |
| ENSG00000149196   | 51501            | HIKESHI            |
| ENSG00000204403   | 100506742        | CASP12             |
| ENSG00000204397   | 114769           | CARD16             |
| ENSG00000149289   | 85463            | ZC3H12C            |
| ENSG00000166736   | 3359             | HTR3A              |
| ENSG00000110324   | 3587             | IL10RA             |
| ENSG00000149428   | 10525            | HYOU1              |
| ENSG00000254612   | NA               | NA                 |
| ENSG00000177406   | 100049716        | LOC100049716       |
| ENSG00000118971   | 894              | CCND2              |
| ENSG00000187569   | 359787           | DPPA3              |
| ENSG00000214851   | 253128           | LINC00612          |
| ENSG00000247157   | 338817           | LINC01252          |
| ENSG00000171681   | 55729            | ATF7IP             |
| ENSG00000111341   | 4256             | MGP                |
| ENSG00000123095   | 79365            | BHLHE41            |
| ENSG00000165935   | 341346           | SMCO2              |
| ENSG00000110841   | 8496             | PPFIBP1            |
| ENSG00000257176   | 100506606        | LOC100506606       |

| <b>Ensembl ID</b> | <b>Enterz ID</b> | <b>Gene Symbol</b> |
|-------------------|------------------|--------------------|
| ENSG00000245614   | 100506660        | DDX11-AS1          |
| ENSG00000134283   | 51535            | PPHLN1             |
| ENSG00000139168   | 85437            | ZCRB1              |
| ENSG00000184613   | 4753             | NELL2              |
| ENSG00000257924   | NA               | NA                 |
| ENSG00000079337   | 10411            | RAPGEF3            |
| ENSG00000123352   | 65244            | SPATS2             |
| ENSG00000050438   | 9498             | SLC4A8             |
| ENSG00000167780   | 8435             | SOAT2              |
| ENSG00000172819   | 5916             | RARG               |
| ENSG00000065361   | 2065             | ERBB3              |
| ENSG00000196531   | 4666             | NACA               |
| ENSG00000213352   | NA               | NA                 |
| ENSG00000187109   | 4673             | NAP1L1             |
| ENSG00000072041   | 55117            | SLC6A15            |
| ENSG00000257345   | NA               | NA                 |
| ENSG00000139344   | 144193           | AMDHD1             |
| ENSG00000012504   | 9971             | NR1H4              |
| ENSG00000111199   | 59341            | TRPV4              |
| ENSG00000111412   | 79794            | C12orf49           |
| ENSG00000111445   | 5985             | RFC5               |
| ENSG00000089220   | 5037             | PEBP1              |
| ENSG00000150991   | 7316             | UBC                |
| ENSG00000132964   | 1024             | CDK8               |
| ENSG00000189403   | 3146             | HMGB1              |
| ENSG00000133083   | 9201             | DCLK1              |
| ENSG00000136167   | 3936             | LCP1               |
| ENSG00000231473   | 100862704        | RB1-DT             |
| ENSG00000136153   | 4008             | LMO7               |
| ENSG00000088387   | 23348            | DOCK9              |
| ENSG00000187498   | 1282             | COL4A1             |
| ENSG00000088448   | 55608            | ANKRD10            |
| ENSG00000129566   | 7011             | TEP1               |
| ENSG00000092067   | 1053             | CEBPE              |
| ENSG00000129473   | 599              | BCL2L2             |
| ENSG00000166091   | 116173           | CMTM5              |
| ENSG00000129515   | 58533            | SNX6               |
| ENSG00000151748   | 60485            | SAV1               |
| ENSG00000089775   | 7597             | ZBTB25             |
| ENSG00000119688   | 5826             | ABCD4              |
| ENSG00000119684   | 27030            | MLH3               |
| ENSG00000089916   | 55668            | GPATCH2L           |

| <b>Ensembl ID</b> | <b>Enterz ID</b> | <b>Gene Symbol</b> |
|-------------------|------------------|--------------------|
| ENSG00000258819   | 102724190        | LINC02289          |
| ENSG00000165409   | 7253             | TSHR               |
| ENSG00000197119   | 123096           | SLC25A29           |
| ENSG00000211896   | NA               | NA                 |
| ENSG00000211897   | NA               | NA                 |
| ENSG00000225698   | NA               | NA                 |
| ENSG00000215252   | 440270           | GOLGA8B            |
| ENSG00000104081   | 90427            | BMF                |
| ENSG00000166887   | 23339            | VPS39              |
| ENSG00000140263   | 6652             | SORD               |
| ENSG00000137857   | 53905            | DUOX1              |
| ENSG00000128849   | 84952            | CGNL1              |
| ENSG00000166104   | NA               | NA                 |
| ENSG00000140416   | 7168             | TPM1               |
| ENSG00000035664   | 23604            | DAPK2              |
| ENSG00000260776   | NA               | NA                 |
| ENSG00000167202   | 23102            | TBC1D2B            |
| ENSG00000185787   | 10933            | MORF4L1            |
| ENSG00000058335   | 5923             | RASGRF1            |
| ENSG00000259445   | NA               | NA                 |
| ENSG00000172183   | 3669             | ISG20              |
| ENSG00000140526   | 11057            | ABHD2              |
| ENSG00000185033   | 10509            | SEMA4B             |
| ENSG00000259582   | 101927310        | LOC101927310       |
| ENSG00000006327   | 51330            | TNFRSF12A          |
| ENSG00000140623   | 124404           | 12-Sep             |
| ENSG00000262097   | 101927311        | LINC02185          |
| ENSG00000087250   | 4504             | MT3                |
| ENSG00000179776   | 1003             | CDH5               |
| ENSG00000159708   | 55282            | LRRC36             |
| ENSG00000182810   | 55794            | DDX28              |
| ENSG00000214353   | 100130894        | VAC14-AS1          |
| ENSG00000103035   | 5713             | PSMD7              |
| ENSG00000166816   | 197257           | LDHD               |
| ENSG00000103196   | 83716            | CRISPLD2           |
| ENSG00000268804   | NA               | NA                 |
| ENSG00000141503   | 50488            | MINK1              |
| ENSG00000181885   | 1366             | CLDN7              |
| ENSG00000132518   | 3000             | GUCY2D             |
| ENSG00000072210   | 224              | ALDH3A2            |
| ENSG00000226521   | NA               | NA                 |
| ENSG00000182271   | 388364           | TMIGD1             |

| <b>Ensembl ID</b> | <b>Enterz ID</b> | <b>Gene Symbol</b> |
|-------------------|------------------|--------------------|
| ENSG00000129277   | NA               | NA                 |
| ENSG00000267671   | NA               | NA                 |
| ENSG00000141753   | 3487             | IGFBP4             |
| ENSG00000167925   | 84514            | GHDC               |
| ENSG00000131469   | 6155             | RPL27              |
| ENSG00000161654   | 124801           | LSM12              |
| ENSG00000168591   | 79089            | TMUB2              |
| ENSG00000267278   | 100133991        | MAP3K14-AS1        |
| ENSG00000186868   | 4137             | MAPT               |
| ENSG00000178852   | 124989           | EFCAB13            |
| ENSG00000005884   | 3675             | ITGA3              |
| ENSG00000108821   | 1277             | COL1A1             |
| ENSG00000153930   | 162282           | ANKFN1             |
| ENSG00000062716   | 81671            | VMP1               |
| ENSG00000108506   | 57508            | INTS2              |
| ENSG00000170412   | 55890            | GPRC5C             |
| ENSG00000109062   | 9368             | SLC9A3R1           |
| ENSG00000267123   | 101928710        | LINC02081          |
| ENSG00000108679   | 3959             | LGALS3BP           |
| ENSG00000101745   | 23253            | ANKRD12            |
| ENSG00000101782   | 8780             | RIOK3              |
| ENSG00000046604   | 1829             | DSG2               |
| ENSG00000267390   | NA               | NA                 |
| ENSG00000221887   | 284293           | HMSD               |
| ENSG00000122490   | 80148            | PQLC1              |
| ENSG00000244588   | 642636           | RAD21L1            |
| ENSG00000125844   | 6238             | RRBP1              |
| ENSG00000125810   | 22918            | CD93               |
| ENSG00000125968   | 3397             | ID1                |
| ENSG00000101346   | 23509            | POFUT1             |
| ENSG00000101421   | 128866           | CHMP4B             |
| ENSG00000125971   | 83658            | DYNLRB1            |
| ENSG00000196756   | 388796           | SNHG17             |
| ENSG00000198900   | 7150             | TOP1               |
| ENSG00000124145   | 6385             | SDC4               |
| ENSG00000124164   | 9217             | VAPB               |
| ENSG00000197561   | 1991             | ELANE              |
| ENSG00000130270   | 148229           | ATP8B3             |
| ENSG00000105278   | 23217            | ZFR2               |
| ENSG00000167769   | 125981           | ACER1              |
| ENSG00000099783   | 4670             | HNRNPM             |
| ENSG00000142347   | 4542             | MYO1F              |



| <b>Ensembl ID</b> | <b>Enterz ID</b> | <b>Gene Symbol</b> |
|-------------------|------------------|--------------------|
| ENSG00000130816   | 1786             | DNMT1              |
| ENSG00000129353   | 57153            | SLC44A2            |
| ENSG00000198429   | 7620             | ZNF69              |
| ENSG00000123143   | 5585             | PKN1               |
| ENSG00000167460   | 7171             | TPM4               |
| ENSG00000130520   | 25804            | LSM4               |
| ENSG00000105707   | 3249             | HPN                |
| ENSG00000233214   | NA               | NA                 |
| ENSG00000090920   | NA               | NA                 |
| ENSG00000105372   | 6223             | RPS19              |
| ENSG00000118156   | 84215            | ZNF541             |
| ENSG00000063177   | 6141             | RPL18              |
| ENSG00000171049   | 2358             | FPR2               |
| ENSG00000189068   | 284415           | VSTM1              |
| ENSG00000223638   | 342931           | RFPL4A             |
| ENSG00000160505   | 147945           | NLRP4              |
| ENSG00000268205   | NA               | NA                 |
| ENSG00000129824   | 6192             | RPS4Y1             |
| ENSG00000154620   | 9087             | TMSB4Y             |
| ENSG00000215580   | 286554           | BCORP1             |
| ENSG00000099889   | 421              | ARVCF              |
| ENSG00000099901   | 5902             | RANBP1             |
| ENSG00000223553   | NA               | NA                 |
| ENSG00000187905   | 400891           | LRRC74B            |
| ENSG00000100218   | 27156            | RSPH14             |
| ENSG00000100228   | 9609             | RAB36              |
| ENSG00000099998   | 2687             | GGT5               |
| ENSG00000100219   | 7494             | XBP1               |
| ENSG00000226471   | NA               | NA                 |
| ENSG00000133488   | 284904           | SEC14L4            |
| ENSG00000128245   | 7533             | YWHAH              |
| ENSG00000128311   | 7263             | TST                |
| ENSG00000100092   | 23616            | SH3BP1             |
| ENSG00000100206   | 11144            | DMC1               |
| ENSG00000100311   | 5155             | PDGFB              |
| ENSG00000100316   | 6122             | RPL3               |
| ENSG00000100416   | 55687            | TRMU               |
| ENSG00000142192   | 351              | APP                |
| ENSG00000185917   | 54093            | SETD4              |
| ENSG00000177398   | 89766            | UMODL1             |
| ENSG00000142173   | 1292             | COL6A2             |

**Table S4. Genes for classification of CRC patients, healthy donors and patients with noncancerous diseases.**

| Ensembl ID      | Entrez ID | Gene Symbol |
|-----------------|-----------|-------------|
| ENSG00000127054 | 54973     | INTS11      |
| ENSG00000171603 | 22883     | CLSTN1      |
| ENSG00000160049 | 1676      | DFFA        |
| ENSG00000162490 | 374946    | DRAXIN      |
| ENSG00000236936 | NA        | NA          |
| ENSG00000130695 | 64793     | CEP85       |
| ENSG00000000938 | 2268      | FGR         |
| ENSG00000160050 | 79140     | CCDC28B     |
| ENSG00000220785 | NA        | NA          |
| ENSG00000142694 | 55194     | EVA1B       |
| ENSG00000084072 | 10450     | PPIE        |
| ENSG00000066185 | 84217     | ZMYND12     |
| ENSG00000159479 | 112950    | MED8        |
| ENSG00000117448 | 10327     | AKR1A1      |
| ENSG00000162377 | 65260     | COA7        |
| ENSG00000142856 | 23421     | ITGB3BP     |
| ENSG00000116652 | NA        | NA          |
| ENSG00000162437 | 55225     | RAVER2      |
| ENSG00000162613 | 8880      | FUBP1       |
| ENSG00000154451 | 115362    | GBP5        |
| ENSG00000235777 | 100873933 | DPYD-AS2    |
| ENSG00000137996 | 8634      | RTCA        |
| ENSG00000177301 | 3737      | KCNA2       |
| ENSG00000156171 | 128338    | DRAM2       |
| ENSG00000198799 | 9860      | LRIG2       |
| ENSG00000052723 | 80143     | SIKE1       |
| ENSG00000173218 | 81839     | VANGL1      |
| ENSG00000225241 | NA        | NA          |
| ENSG00000215861 | 653513    | LOC653513   |
| ENSG00000143369 | 1893      | ECM1        |
| ENSG00000163131 | 1520      | CTSS        |
| ENSG00000143434 | 10500     | SEMA6C      |
| ENSG00000163220 | 6280      | S100A9      |
| ENSG00000143554 | 11000     | SLC27A3     |
| ENSG00000162739 | 114836    | SLAMF6      |
| ENSG00000188404 | 6402      | SELL        |
| ENSG00000135845 | 5279      | PIGC        |
| ENSG00000234741 | 60674     | GAS5        |
| ENSG00000116161 | 27101     | CACYBP      |
| ENSG00000075391 | 9462      | RASAL2      |

| <b>Ensembl ID</b> | <b>Entrez ID</b> | <b>Gene Symbol</b> |
|-------------------|------------------|--------------------|
| ENSG00000116668   | 54823            | SWT1               |
| ENSG00000023572   | 51022            | GLRX2              |
| ENSG000000081237  | 5788             | PTPRC              |
| ENSG00000143486   | 1939             | EIF2D              |
| ENSG00000228106   | NA               | NA                 |
| ENSG00000187554   | 7100             | TLR5               |
| ENSG00000059588   | 6894             | TARBP1             |
| ENSG00000151694   | 6868             | ADAM17             |
| ENSG00000205795   | 192668           | CYS1               |
| ENSG00000169016   | 1876             | E2F6               |
| ENSG00000079785   | 1653             | DDX1               |
| ENSG00000119771   | 114818           | KLHL29             |
| ENSG00000138092   | 79172            | CENPO              |
| ENSG00000115207   | 2976             | GTF3C2             |
| ENSG00000198522   | 11321            | GPN1               |
| ENSG00000243147   | 9553             | MRPL33             |
| ENSG00000213626   | 81606            | LBH                |
| ENSG00000115816   | 10153            | CEBPZ              |
| ENSG00000115944   | 9167             | COX7A2L            |
| ENSG00000119729   | 23433            | RHOQ               |
| ENSG00000028116   | 7444             | VRK2               |
| ENSG00000162928   | 5194             | PEX13              |
| ENSG00000232046   | 100507073        | LINC01798          |
| ENSG00000124374   | 400961           | PAIP2B             |
| ENSG00000042493   | 822              | CAPG               |
| ENSG00000132300   | 55037            | PTCD3              |
| ENSG00000135945   | 51455            | REV1               |
| ENSG00000175701   | 205251           | SMIM37             |
| ENSG00000153208   | 10461            | MERTK              |
| ENSG00000125611   | 84269            | CHCHD5             |
| ENSG00000136709   | 55339            | WDR33              |
| ENSG00000232606   | NA               | NA                 |
| ENSG00000136536   | 64844            | MARCH7             |
| ENSG00000182263   | 55137            | FIGN               |
| ENSG00000169507   | 151258           | SLC38A11           |
| ENSG00000138385   | 6741             | SSB                |
| ENSG00000162998   | 2487             | FRZB               |
| ENSG00000224063   | NA               | NA                 |
| ENSG00000138378   | 6775             | STAT4              |
| ENSG000000081320  | 9262             | STK17B             |
| ENSG00000240344   | 53938            | PPIL3              |
| ENSG00000163596   | 130026           | ICA1L              |

| <b>Ensembl ID</b> | <b>Entrez ID</b> | <b>Gene Symbol</b> |
|-------------------|------------------|--------------------|
| ENSG00000023228   | 4719             | NDUFS1             |
| ENSG00000223725   | NA               | NA                 |
| ENSG00000030419   | 22807            | IKZF2              |
| ENSG00000156973   | 5147             | PDE6D              |
| ENSG00000066248   | 25791            | NGEF               |
| ENSG00000132321   | 79781            | IQCA1              |
| ENSG00000153558   | 25827            | FBXL2              |
| ENSG00000008226   | 9940             | DLEC1              |
| ENSG00000179152   | 285343           | TCAIM              |
| ENSG00000068745   | 51447            | IP6K2              |
| ENSG00000185909   | 200942           | KLHDC8B            |
| ENSG00000164068   | 63891            | RNF123             |
| ENSG00000088543   | 51161            | C3orf18            |
| ENSG00000023330   | 211              | ALAS1              |
| ENSG00000163380   | 56203            | LMOD3              |
| ENSG00000113966   | 84100            | ARL6               |
| ENSG00000144802   | 64332            | NFKBIZ             |
| ENSG00000181722   | 26137            | ZBTB20             |
| ENSG00000144843   | 141              | ADPRH              |
| ENSG00000163755   | 84343            | HPS3               |
| ENSG00000198829   | 56670            | SUCNR1             |
| ENSG00000114790   | 26084            | ARHGEF26           |
| ENSG00000079257   | 56925            | LXN                |
| ENSG00000171757   | 151827           | LRRC34             |
| ENSG00000144962   | 83893            | SPATA16            |
| ENSG00000090530   | 55214            | P3H2               |
| ENSG00000188958   | 257313           | UTS2B              |
| ENSG00000187527   | 344905           | ATP13A5            |
| ENSG00000198836   | 4976             | OPA1               |
| ENSG00000168824   | 27065            | NSG1               |
| ENSG00000196526   | 60312            | AFAP1              |
| ENSG00000109814   | 7358             | UGDH               |
| ENSG00000109189   | 64854            | USP46              |
| ENSG00000249242   | 441027           | TMEM150C           |
| ENSG00000172399   | 51778            | MYOZ2              |
| ENSG00000245958   | 645513           | LOC645513          |
| ENSG00000164168   | 55751            | TMEM184C           |
| ENSG00000109686   | 152503           | SH3D19             |
| ENSG00000109654   | 23321            | TRIM2              |
| ENSG00000109586   | 51809            | GALNT7             |
| ENSG00000249915   | 10016            | PDCD6              |
| ENSG00000213430   | NA               | NA                 |

| <b>Ensembl ID</b> | <b>Entrez ID</b> | <b>Gene Symbol</b> |
|-------------------|------------------|--------------------|
| ENSG00000113460   | 55299            | BRIX1              |
| ENSG00000198865   | 100129792        | CCDC152            |
| ENSG00000164172   | 4338             | MOCS2              |
| ENSG00000067113   | 8611             | PLPP1              |
| ENSG00000164512   | 79722            | ANKRD55            |
| ENSG00000113593   | 23398            | PPWD1              |
| ENSG00000152413   | 9456             | HOMER1             |
| ENSG00000081189   | 4208             | MEF2C              |
| ENSG00000153113   | 831              | CAST               |
| ENSG00000129595   | 64097            | EPB41L4A           |
| ENSG00000145779   | 25816            | TNFAIP8            |
| ENSG00000164244   | 133619           | PRRC1              |
| ENSG00000244921   | NA               | NA                 |
| ENSG00000146013   | 2676             | GFRA3              |
| ENSG00000120738   | 1958             | EGR1               |
| ENSG00000070814   | 6949             | TCOF1              |
| ENSG00000039600   | 11063            | SOX30              |
| ENSG00000155858   | 134353           | LSM11              |
| ENSG00000174705   | 285590           | SH3PXD2B           |
| ENSG00000164466   | 94081            | SFXN1              |
| ENSG00000131459   | 9945             | GFPT2              |
| ENSG00000111843   | 51522            | TMEM14C            |
| ENSG00000112186   | 10486            | CAP2               |
| ENSG00000112304   | 55856            | ACOT13             |
| ENSG00000010704   | 3077             | HFE                |
| ENSG00000158406   | 8365             | HIST1H4H           |
| ENSG00000146109   | 29777            | ABT1               |
| ENSG00000096654   | 7738             | ZNF184             |
| ENSG00000137404   | 11270            | NRM                |
| ENSG00000204475   | 259197           | NCR3               |
| ENSG00000204287   | 3122             | HLA-DRA            |
| ENSG00000198502   | 3127             | HLA-DRB5           |
| ENSG00000112640   | 5528             | PPP2R5D            |
| ENSG00000180992   | 64928            | MRPL14             |
| ENSG00000112077   | 6005             | RHAG               |
| ENSG00000188107   | 346007           | EYS                |
| ENSG00000118407   | 27145            | FILIP1             |
| ENSG00000013375   | 5238             | PGM3               |
| ENSG00000111886   | 2570             | GABRR2             |
| ENSG00000123552   | 85015            | USP45              |
| ENSG00000112297   | 202              | CRYBG1             |
| ENSG00000243587   | NA               | NA                 |

| <b>Ensembl ID</b> | <b>Entrez ID</b> | <b>Gene Symbol</b> |
|-------------------|------------------|--------------------|
| ENSG00000196591   | 3066             | HDAC2              |
| ENSG00000188820   | 441168           | CALHM6             |
| ENSG00000047932   | 57120            | GOPC               |
| ENSG00000196569   | 3908             | LAMA2              |
| ENSG00000118515   | 6446             | SGK1               |
| ENSG00000118503   | 7128             | TNFAIP3            |
| ENSG00000092820   | 7430             | EZR                |
| ENSG00000106399   | 6119             | RPA3               |
| ENSG00000136261   | 28969            | BZW2               |
| ENSG00000106546   | 196              | AHR                |
| ENSG00000136237   | 9771             | RAPGEF5            |
| ENSG00000156928   | 115416           | MALSU1             |
| ENSG00000153814   | 221895           | JAZF1              |
| ENSG00000106086   | 84725            | PLEKHA8            |
| ENSG00000105778   | 23080            | AVL9               |
| ENSG00000211698   | NA               | NA                 |
| ENSG00000211699   | NA               | NA                 |
| ENSG00000198039   | 10793            | ZNF273             |
| ENSG00000214293   | 100505854        | APTR               |
| ENSG00000127928   | 2792             | GNGT1              |
| ENSG00000196652   | 23660            | ZKSCAN5            |
| ENSG00000164675   | 154865           | IQUB               |
| ENSG00000128513   | 25913            | POT1               |
| ENSG00000237243   | NA               | NA                 |
| ENSG00000122778   | 57670            | KIAA1549           |
| ENSG00000257743   | 93432            | MGAM2              |
| ENSG00000213203   | 170575           | GIMAP1             |
| ENSG00000002933   | 55365            | TMEM176A           |
| ENSG00000178234   | 63917            | GALNT11            |
| ENSG00000241735   | 220832           | FABP5P3            |
| ENSG00000214106   | 100132707        | PAXIP1-AS2         |
| ENSG00000157212   | 22976            | PAXIP1             |
| ENSG00000102010   | 660              | BMX                |
| ENSG00000086712   | 55787            | TXLNG              |
| ENSG00000184831   | 79135            | APOO               |
| ENSG00000158427   | 286527           | TMSB15B            |
| ENSG00000182319   | NA               | NA                 |
| ENSG00000175445   | 4023             | LPL                |
| ENSG00000241852   | 541565           | C8orf58            |
| ENSG00000147535   | 84513            | PLPP5              |
| ENSG00000047249   | 51606            | ATP6V1H            |
| ENSG00000008988   | 6224             | RPS20              |

| <b>Ensembl ID</b> | <b>Entrez ID</b> | <b>Gene Symbol</b> |
|-------------------|------------------|--------------------|
| ENSG00000164751   | 5828             | PEX2               |
| ENSG00000237264   | NA               | NA                 |
| ENSG00000155100   | 51633            | OTUD6B             |
| ENSG00000188343   | 137392           | FAM92A             |
| ENSG00000120963   | 51123            | ZNF706             |
| ENSG00000246263   | 101927221        | UBR5-AS1           |
| ENSG00000164929   | 79870            | BAALC              |
| ENSG00000164935   | 81501            | DCSTAMP            |
| ENSG00000172167   | 27085            | MTBP               |
| ENSG00000042832   | 7038             | TG                 |
| ENSG00000155926   | 6503             | SLA                |
| ENSG00000178685   | 84875            | PARP10             |
| ENSG00000147852   | 7436             | VLDLR              |
| ENSG00000187742   | 79048            | SECISBP2           |
| ENSG00000196312   | 84278            | MFSD14C            |
| ENSG00000136936   | 7507             | XPA                |
| ENSG00000056558   | 7185             | TRAF1              |
| ENSG00000136877   | 2356             | FPGS               |
| ENSG00000223551   | NA               | NA                 |
| ENSG00000130707   | 445              | ASS1               |
| ENSG00000148296   | 6838             | SURF6              |
| ENSG00000123453   | 1757             | SARDH              |
| ENSG00000196139   | 8644             | AKR1C3             |
| ENSG00000134470   | 3601             | IL15RA             |
| ENSG00000151657   | 22944            | KIN                |
| ENSG00000229124   | 100507347        | VIM-AS1            |
| ENSG00000151151   | 253430           | IPMK               |
| ENSG00000198954   | 26128            | KIF1BP             |
| ENSG00000107742   | 9806             | SPOCK2             |
| ENSG00000138303   | 51008            | ASCC1              |
| ENSG00000166348   | 159195           | USP54              |
| ENSG00000214655   | 23053            | ZSWIM8             |
| ENSG00000148655   | 83938            | LRMDA              |
| ENSG00000152782   | 53354            | PANK1              |
| ENSG00000107443   | 54619            | CCNJ               |
| ENSG00000227492   | NA               | NA                 |
| ENSG00000099194   | 6319             | SCD                |
| ENSG00000077150   | 4791             | NFKB2              |
| ENSG00000179988   | 118672           | PSTK               |
| ENSG00000196565   | 3048             | HBG2               |
| ENSG00000171714   | 203859           | ANO5               |
| ENSG00000176697   | 627              | BDNF               |

| <b>Ensembl ID</b> | <b>Entrez ID</b> | <b>Gene Symbol</b> |
|-------------------|------------------|--------------------|
| ENSG00000109911   | 26610            | ELP4               |
| ENSG00000254879   | NA               | NA                 |
| ENSG00000255189   | NA               | NA                 |
| ENSG00000166902   | 54948            | MRPL16             |
| ENSG00000176485   | 11145            | PLA2G16            |
| ENSG00000014138   | 23649            | POLA2              |
| ENSG00000173039   | 5970             | RELA               |
| ENSG00000172543   | 1521             | CTSW               |
| ENSG00000087365   | 10992            | SF3B2              |
| ENSG00000174165   | 254359           | ZDHHC24            |
| ENSG00000175634   | 6199             | RPS6KB2            |
| ENSG00000184154   | 220074           | LRTOMT             |
| ENSG00000166435   | 143570           | XRRA1              |
| ENSG00000254429   | NA               | NA                 |
| ENSG00000149257   | 871              | SERPINH1           |
| ENSG00000171533   | 4135             | MAP6               |
| ENSG00000137507   | 2615             | LRRC32             |
| ENSG00000227376   | NA               | NA                 |
| ENSG00000087884   | 28971            | AAMDC              |
| ENSG00000042429   | 9440             | MED17              |
| ENSG00000137693   | 10413            | YAP1               |
| ENSG00000150776   | 55216            | NKAPD1             |
| ENSG00000166741   | 4837             | NNMT               |
| ENSG00000002016   | 5893             | RAD52              |
| ENSG00000171860   | 719              | C3AR1              |
| ENSG00000111796   | 3820             | KLRB1              |
| ENSG00000139112   | 23710            | GABARAPL1          |
| ENSG00000151490   | 5800             | PTPRO              |
| ENSG00000121350   | 79912            | PYROXD1            |
| ENSG00000256377   | NA               | NA                 |
| ENSG00000175548   | 144245           | ALG10B             |
| ENSG00000111077   | 23371            | TNS2               |
| ENSG00000181852   | 10193            | RNF41              |
| ENSG00000175203   | 10540            | DCTN2              |
| ENSG00000135407   | 10677            | AVIL               |
| ENSG00000177990   | 283417           | DPY19L2            |
| ENSG00000090382   | 4069             | LYZ                |
| ENSG00000173401   | 256710           | GLIPR1L1           |
| ENSG00000139278   | 11010            | GLIPR1             |
| ENSG00000111615   | 11103            | KRR1               |
| ENSG00000111144   | 4048             | LTA4H              |
| ENSG00000120805   | 400              | ARL1               |



| <b>Ensembl ID</b> | <b>Entrez ID</b> | <b>Gene Symbol</b> |
|-------------------|------------------|--------------------|
| ENSG00000255857   | 100506649        | PXN-AS1            |
| ENSG00000257218   | 283459           | GATC               |
| ENSG00000135124   | 5025             | P2RX4              |
| ENSG00000110931   | 10645            | CAMKK2             |
| ENSG00000170633   | 80196            | RNF34              |
| ENSG00000033030   | 55596            | ZCCHC8             |
| ENSG00000130921   | 91574            | C12orf65           |
| ENSG00000139517   | 222484           | LNX2               |
| ENSG00000102738   | 10240            | MRPS31             |
| ENSG00000231607   | 8847             | DLEU2              |
| ENSG00000136122   | 79866            | BORA               |
| ENSG00000175198   | 5095             | PCCA               |
| ENSG00000215271   | 57594            | HOMEZ              |
| ENSG00000186648   | 90668            | CARMIL3            |
| ENSG00000139908   | 283629           | TSSK4              |
| ENSG00000100916   | 84312            | BRMS1L             |
| ENSG00000139946   | 57161            | PELI2              |
| ENSG00000126814   | 57570            | TRMT5              |
| ENSG00000126785   | 57381            | RHOJ               |
| ENSG00000119596   | 56252            | YLPM1              |
| ENSG00000197249   | 5265             | SERPINA1           |
| ENSG00000185215   | 7127             | TNFAIP2            |
| ENSG00000166166   | 115708           | TRMT61A            |
| ENSG00000227729   | 647286           | RD3L               |
| ENSG00000226777   | 9834             | FAM30A             |
| ENSG00000224078   | NA               | NA                 |
| ENSG00000103599   | 64799            | IQCH               |
| ENSG00000178802   | 4351             | MPI                |
| ENSG00000198794   | 192683           | SCAMP5             |
| ENSG00000140398   | 79661            | NEIL1              |
| ENSG00000169410   | 5780             | PTPN9              |
| ENSG00000167196   | 26263            | FBXO22             |
| ENSG00000188659   | 283726           | SAXO2              |
| ENSG00000131876   | 6627             | SNRPA1             |
| ENSG00000238098   | 650655           | ABCA17P            |
| ENSG00000162065   | 57465            | TBC1D24            |
| ENSG00000131652   | 79228            | THOC6              |
| ENSG00000167984   | 197358           | NLRC3              |
| ENSG00000179889   | 23042            | PDXDC1             |
| ENSG00000134419   | 6210             | RPS15A             |
| ENSG00000271609   | NA               | NA                 |
| ENSG00000058600   | 55718            | POLR3E             |

| <b>Ensembl ID</b> | <b>Entrez ID</b> | <b>Gene Symbol</b> |
|-------------------|------------------|--------------------|
| ENSG00000140750   | 55114            | ARHGAP17           |
| ENSG00000188603   | 1201             | CLN3               |
| ENSG00000261239   | NA               | NA                 |
| ENSG00000171241   | 79801            | SHCBP1             |
| ENSG00000187193   | 4501             | MT1X               |
| ENSG00000104731   | 54758            | KLHDC4             |
| ENSG00000185324   | 8558             | CDK10              |
| ENSG00000070366   | 23293            | SMG6               |
| ENSG00000167720   | 63826            | SRR                |
| ENSG00000141258   | 9905             | SGSM2              |
| ENSG00000040531   | 1497             | CTNS               |
| ENSG00000167842   | 79003            | MIS12              |
| ENSG00000215067   | 100506713        | ALOX12-AS1         |
| ENSG00000221926   | 10626            | TRIM16             |
| ENSG00000154025   | 125206           | SLC5A10            |
| ENSG00000154898   | NA               | NA                 |
| ENSG00000214832   | NA               | NA                 |
| ENSG00000109084   | 27346            | TMEM97             |
| ENSG00000007202   | 9703             | KIAA0100           |
| ENSG00000092871   | 117584           | RFFL               |
| ENSG00000172660   | NA               | NA                 |
| ENSG00000141140   | NA               | NA                 |
| ENSG00000108753   | NA               | NA                 |
| ENSG00000056661   | NA               | NA                 |
| ENSG00000167107   | 80221            | ACSF2              |
| ENSG00000006282   | 64847            | SPATA20            |
| ENSG00000154975   | 56934            | CA10               |
| ENSG00000121053   | 8288             | EPX                |
| ENSG00000189050   | 51136            | RNFT1              |
| ENSG00000008283   | 1534             | CYB561             |
| ENSG00000271605   | 284021           | MILR1              |
| ENSG00000266714   | 80022            | MYO15B             |
| ENSG00000214140   | 768206           | PRCD               |
| ENSG00000163597   | 100507246        | SNHG16             |
| ENSG00000267506   | NA               | NA                 |
| ENSG00000262873   | NA               | NA                 |
| ENSG00000176155   | 284001           | CCDC57             |
| ENSG00000079134   | 9984             | THOC1              |
| ENSG00000176890   | 7298             | TYMS               |
| ENSG00000154655   | 91133            | L3MBTL4            |
| ENSG00000177150   | 125228           | FAM210A            |
| ENSG00000101773   | 5932             | RBBP8              |

| <b>Ensembl ID</b> | <b>Entrez ID</b> | <b>Gene Symbol</b> |
|-------------------|------------------|--------------------|
| ENSG00000153339   | 22878            | TRAPPC8            |
| ENSG00000134769   | 1837             | DTNA               |
| ENSG00000152217   | 26040            | SETBP1             |
| ENSG00000134042   | 83876            | MRO                |
| ENSG00000091157   | 23335            | WDR7               |
| ENSG00000242550   | 5273             | SERPINB10          |
| ENSG00000125901   | 64949            | MRPS26             |
| ENSG00000171984   | 149840           | C20orf196          |
| ENSG00000101230   | 140862           | ISM1               |
| ENSG00000101004   | 22981            | NINL               |
| ENSG00000213742   | 102724826        | ZNF337-AS1         |
| ENSG00000101412   | 1869             | E2F1               |
| ENSG00000080845   | 22839            | DLGAP4             |
| ENSG00000198026   | 63925            | ZNF335             |
| ENSG00000198185   | 55713            | ZNF334             |
| ENSG00000124243   | 55653            | BCAS4              |
| ENSG00000124224   | NA               | NA                 |
| ENSG00000171469   | 93134            | ZNF561             |
| ENSG00000090339   | 3383             | ICAM1              |
| ENSG00000223547   | 284391           | ZNF844             |
| ENSG00000197857   | 51710            | ZNF44              |
| ENSG00000105607   | 2639             | GCDH               |
| ENSG00000130309   | 79709            | COLGALT1           |
| ENSG00000105750   | 7639             | ZNF85              |
| ENSG00000268278   | NA               | NA                 |
| ENSG00000213971   | NA               | NA                 |
| ENSG00000153879   | 1054             | CEBPG              |
| ENSG00000153902   | 163175           | LGI4               |
| ENSG00000268947   | NA               | NA                 |
| ENSG00000011600   | 7305             | TYROBP             |
| ENSG00000086544   | 80271            | ITPKC              |
| ENSG00000167578   | 53916            | RAB4B              |
| ENSG00000079462   | 5050             | PAFAH1B3           |
| ENSG00000267680   | 7767             | ZNF224             |
| ENSG00000230510   | 100506012        | PPP5D1             |
| ENSG00000178150   | 163071           | ZNF114             |
| ENSG00000169169   | 126129           | CPT1C              |
| ENSG00000104960   | 53635            | PTOV1              |
| ENSG00000170954   | 55786            | ZNF415             |
| ENSG00000133247   | 84787            | KMT5C              |
| ENSG00000178935   | 79818            | ZNF552             |
| ENSG00000099725   | 5616             | PRKY               |

| <b>Ensembl ID</b> | <b>Entrez ID</b> | <b>Gene Symbol</b> |
|-------------------|------------------|--------------------|
| ENSG00000215193   | 55670            | PEX26              |
| ENSG00000100027   | 29799            | YPEL1              |
| ENSG00000272216   | NA               | NA                 |
| ENSG00000178026   | 388886           | LRRC75B            |
| ENSG00000100150   | 9681             | DEPDC5             |
| ENSG00000100234   | 7078             | TIMP3              |
| ENSG00000100079   | 3957             | LGALS2             |
| ENSG00000184381   | 8398             | PLA2G6             |
| ENSG00000100226   | 9567             | GTPBP1             |
| ENSG00000186976   | 64800            | EFCAB6             |
| ENSG00000156253   | 10069            | RWDD2B             |
| ENSG00000159147   | 29980            | DONSON             |
| ENSG00000160191   | 5152             | PDE9A              |
| ENSG00000160255   | 3689             | ITGB2              |
| ENSG00000225630   | NA               | NA                 |
| ENSG00000237973   | NA               | NA                 |
| ENSG00000248527   | NA               | NA                 |
| ENSG00000179403   | 64856            | VWA1               |
| ENSG00000116251   | 6146             | RPL22              |
| ENSG00000225077   | NA               | NA                 |
| ENSG00000175262   | 148345           | C1orf127           |
| ENSG00000127481   | 23352            | UBR4               |
| ENSG00000142798   | 3339             | HSPG2              |
| ENSG00000070831   | 998              | CDC42              |
| ENSG00000204219   | 6920             | TCEA3              |
| ENSG00000117318   | 3399             | ID3                |
| ENSG00000117305   | 3155             | HMGCL              |
| ENSG00000130768   | 27293            | SMPDL3B            |
| ENSG00000134697   | 29889            | GNL2               |
| ENSG00000169218   | 284654           | RSPO1              |
| ENSG00000131236   | 10487            | CAP1               |
| ENSG00000065978   | 4904             | YBX1               |
| ENSG00000117834   | 200010           | SLC5A9             |
| ENSG00000203356   | 105378716        | LINC01562          |
| ENSG00000162407   | 8613             | PLPP3              |
| ENSG00000134716   | 1573             | CYP2J2             |
| ENSG00000237928   | 100996570        | NFIA-AS2           |
| ENSG00000132849   | 10207            | PATJ               |
| ENSG00000203963   | 400757           | C1orf141           |
| ENSG00000142864   | 26135            | SERBP1             |
| ENSG00000162620   | 127255           | LRRIQ3             |
| ENSG00000137968   | 204962           | SLC44A5            |

| <b>Ensembl ID</b> | <b>Entrez ID</b> | <b>Gene Symbol</b> |
|-------------------|------------------|--------------------|
| ENSG00000142875   | 5567             | PRKACB             |
| ENSG00000162643   | 126820           | WDR63              |
| ENSG00000213512   | 388646           | GBP7               |
| ENSG00000237435   | 102723661        | LOC102723661       |
| ENSG00000188641   | 1806             | DPYD               |
| ENSG00000162695   | 148867           | SLC30A7            |
| ENSG00000143126   | 1952             | CELSR2             |
| ENSG00000143093   | 85369            | STRIP1             |
| ENSG00000116473   | 5906             | RAP1A              |
| ENSG00000198162   | 10905            | MAN1A2             |
| ENSG00000134193   | 83998            | REG4               |
| ENSG00000232265   | 100505824        | LOC100505824       |
| ENSG00000143546   | 6279             | S100A8             |
| ENSG00000143537   | 8751             | ADAM15             |
| ENSG00000233540   | 100874284        | DNM3-IT1           |
| ENSG00000162779   | 126859           | AXDND1             |
| ENSG00000162782   | 163589           | TDRD5              |
| ENSG00000143337   | 26092            | TOR1AIP1           |
| ENSG00000143333   | 6004             | RGS16              |
| ENSG00000058085   | 3918             | LAMC2              |
| ENSG00000162704   | 10092            | ARPC5              |
| ENSG00000116679   | 10625            | IVNS1ABP           |
| ENSG00000214796   | NA               | NA                 |
| ENSG00000133048   | 1116             | CHI3L1             |
| ENSG00000133065   | 254428           | SLC41A1            |
| ENSG00000143502   | 55061            | SUSD4              |
| ENSG00000162909   | 824              | CAPN2              |
| ENSG00000154358   | 84033            | OBSCN              |
| ENSG00000135773   | 10753            | CAPN9              |
| ENSG00000119285   | 55127            | HEATR1             |
| ENSG00000162843   | 128025           | WDR64              |
| ENSG00000162852   | 163882           | CNST               |
| ENSG00000115705   | 7173             | TPO                |
| ENSG00000186487   | 23040            | MYT1L              |
| ENSG00000214866   | 728597           | DCDC2C             |
| ENSG00000235576   | NA               | NA                 |
| ENSG00000134308   | 10971            | YWHAQ              |
| ENSG00000224400   | NA               | NA                 |
| ENSG00000213639   | 5500             | PPP1CB             |
| ENSG00000230876   | 285045           | LINC00486          |
| ENSG00000177994   | 129852           | C2orf73            |
| ENSG00000115380   | 2202             | EFEMP1             |

| <b>Ensembl ID</b> | <b>Entrez ID</b> | <b>Gene Symbol</b> |
|-------------------|------------------|--------------------|
| ENSG00000119862   | 29094            | LGALS1             |
| ENSG00000169564   | 5093             | PCBP1              |
| ENSG00000118640   | 8673             | VAMP8              |
| ENSG00000243264   | NA               | NA                 |
| ENSG00000241244   | NA               | NA                 |
| ENSG00000211633   | NA               | NA                 |
| ENSG00000168754   | 51252            | FAM178B            |
| ENSG00000168658   | 200403           | VWA3B              |
| ENSG00000169756   | 3987             | LIMS1              |
| ENSG00000115091   | 10096            | ACTR3              |
| ENSG00000115112   | 29842            | TFCP2L1            |
| ENSG00000072163   | 55679            | LIMS2              |
| ENSG00000238860   | NA               | NA                 |
| ENSG00000121989   | 92               | ACVR2A             |
| ENSG00000073737   | 10170            | DHRS9              |
| ENSG00000115252   | 5136             | PDE1A              |
| ENSG00000138448   | 3685             | ITGAV              |
| ENSG00000168542   | 1281             | COL3A1             |
| ENSG00000243478   | NA               | NA                 |
| ENSG00000204186   | 57683            | ZDBF2              |
| ENSG00000114948   | 8745             | ADAM23             |
| ENSG00000144406   | 285175           | UNC80              |
| ENSG00000135929   | 1593             | CYP27A1            |
| ENSG00000123989   | 79586            | CHPF               |
| ENSG00000116106   | 2043             | EPHA4              |
| ENSG00000178602   | 150677           | OTOS               |
| ENSG00000196277   | 2917             | GRM7               |
| ENSG00000170876   | 79188            | TMEM43             |
| ENSG00000092345   | 1618             | DAZL               |
| ENSG00000231304   | 100874028        | SGO1-AS1           |
| ENSG00000174748   | 6138             | RPL15              |
| ENSG00000091317   | 54918            | CMTM6              |
| ENSG00000188846   | 9045             | RPL14              |
| ENSG00000241186   | 6997             | TDGF1              |
| ENSG00000172037   | 3913             | LAMB2              |
| ENSG00000187672   | 26059            | ERC2               |
| ENSG00000144724   | 5793             | PTPRG              |
| ENSG00000163618   | 8618             | CADPS              |
| ENSG00000183662   | 407738           | FAM19A1            |
| ENSG00000144746   | 10550            | ARL6IP5            |
| ENSG00000081154   | 57092            | PCNP               |
| ENSG00000144821   | 22989            | MYH15              |

| <b>Ensembl ID</b> | <b>Entrez ID</b> | <b>Gene Symbol</b> |
|-------------------|------------------|--------------------|
| ENSG00000091986   | 151887           | CCDC80             |
| ENSG00000185565   | 4045             | LSAMP              |
| ENSG00000031081   | 57514            | ARHGAP31           |
| ENSG00000221955   | 84561            | SLC12A8            |
| ENSG00000196353   | 131034           | CPNE4              |
| ENSG00000240086   | NA               | NA                 |
| ENSG00000242104   | NA               | NA                 |
| ENSG00000169903   | 7104             | TM4SF4             |
| ENSG00000152580   | 285313           | IGSF10             |
| ENSG00000244268   | NA               | NA                 |
| ENSG00000197415   | 79674            | VEPH1              |
| ENSG00000182903   | 170960           | ZNF721             |
| ENSG00000163956   | 4043             | LRPAP1             |
| ENSG00000071127   | 9948             | WDR1               |
| ENSG00000109805   | 64151            | NCAPG              |
| ENSG00000249645   | NA               | NA                 |
| ENSG00000163285   | 2565             | GABRG1             |
| ENSG00000109171   | 57606            | SLAIN2             |
| ENSG00000128040   | 6691             | SPINK2             |
| ENSG00000169116   | 25849            | PARM1              |
| ENSG00000260265   | NA               | NA                 |
| ENSG00000156194   | 5470             | PPEF2              |
| ENSG00000138760   | 950              | SCARB2             |
| ENSG00000138758   | 55752            | SEPT11             |
| ENSG00000197826   | 255119           | CFAP299            |
| ENSG00000145287   | 51316            | PLAC8              |
| ENSG00000145332   | 57563            | KLHL8              |
| ENSG00000170509   | 345275           | HSD17B13           |
| ENSG00000248373   | NA               | NA                 |
| ENSG00000164109   | 4085             | MAD2L1             |
| ENSG00000249464   | 285419           | LINC01091          |
| ENSG00000077684   | 79960            | JADE1              |
| ENSG00000153132   | 1047             | CLGN               |
| ENSG00000109670   | 55294            | FBXW7              |
| ENSG00000151790   | 6999             | TDO2               |
| ENSG00000251511   | NA               | NA                 |
| ENSG00000109572   | 1182             | CLCN3              |
| ENSG00000250131   | NA               | NA                 |
| ENSG00000145476   | 285440           | CYP4V2             |
| ENSG00000223361   | NA               | NA                 |
| ENSG00000248294   | NA               | NA                 |
| ENSG00000226259   | NA               | NA                 |

| <b>Ensembl ID</b> | <b>Entrez ID</b> | <b>Gene Symbol</b> |
|-------------------|------------------|--------------------|
| ENSG00000172497   | 134526           | ACOT12             |
| ENSG00000152348   | 83734            | ATG10              |
| ENSG00000151422   | 2241             | FER                |
| ENSG00000145777   | 85480            | TSLP               |
| ENSG00000238160   | NA               | NA                 |
| ENSG00000249119   | NA               | NA                 |
| ENSG00000248923   | NA               | NA                 |
| ENSG00000152377   | 6695             | SPOCK1             |
| ENSG00000164266   | 6690             | SPINK1             |
| ENSG00000211445   | 2878             | GPX3               |
| ENSG00000113140   | 6678             | SPARC              |
| ENSG00000022355   | 2554             | GABRA1             |
| ENSG00000250274   | 100128059        | LOC100128059       |
| ENSG00000113240   | 57396            | CLK4               |
| ENSG00000176783   | 80230            | RUFY1              |
| ENSG00000244041   | NA               | NA                 |
| ENSG00000124491   | 2162             | F13A1              |
| ENSG00000223342   | NA               | NA                 |
| ENSG00000096696   | 1832             | DSP                |
| ENSG00000229931   | NA               | NA                 |
| ENSG00000137261   | 9856             | KIAA0319           |
| ENSG00000180596   | 8347             | HIST1H2BC          |
| ENSG00000197459   | NA               | NA                 |
| ENSG00000225173   | NA               | NA                 |
| ENSG00000204580   | 780              | DDR1               |
| ENSG00000213722   | 23564            | DDAH2              |
| ENSG00000204386   | 4758             | NEU1               |
| ENSG00000231500   | 6222             | RPS18              |
| ENSG00000204220   | 10471            | PFDN6              |
| ENSG00000112164   | 2740             | GLP1R              |
| ENSG00000096006   | 10321            | CRISP3             |
| ENSG00000186231   | 114792           | KLHL32             |
| ENSG00000173214   | 91749            | MFSD4B             |
| ENSG00000155130   | NA               | NA                 |
| ENSG00000203760   | 387103           | CENPW              |
| ENSG00000146376   | 93663            | ARHGAP18           |
| ENSG00000216917   | NA               | NA                 |
| ENSG00000118514   | 64577            | ALDH8A1            |
| ENSG00000225177   | NA               | NA                 |
| ENSG00000120265   | 5110             | PCMT1              |
| ENSG00000198729   | 81706            | PPP1R14C           |
| ENSG00000131016   | 9590             | AKAP12             |



| <b>Ensembl ID</b> | <b>Entrez ID</b> | <b>Gene Symbol</b> |
|-------------------|------------------|--------------------|
| ENSG00000130338   | 56995            | TULP4              |
| ENSG00000112096   | 6648             | SOD2               |
| ENSG00000086232   | 27102            | EIF2AK1            |
| ENSG00000236039   | 101927630        | LOC101927630       |
| ENSG00000271133   | 101927811        | LOC101927811       |
| ENSG00000105926   | 51678            | MPP6               |
| ENSG00000122643   | 51251            | NT5C3A             |
| ENSG00000122545   | 989              | SEPT7              |
| ENSG00000106624   | 165              | AEBP1              |
| ENSG00000106078   | 23242            | COBL               |
| ENSG00000146648   | 1956             | EGFR               |
| ENSG00000006704   | 9569             | GTF2IRD1           |
| ENSG00000164692   | 1278             | COL1A2             |
| ENSG00000160868   | 1576             | CYP3A4             |
| ENSG00000091136   | 3912             | LAMB1              |
| ENSG00000128609   | 4698             | NDUFA5             |
| ENSG00000128585   | 4289             | MKLN1              |
| ENSG00000198074   | 57016            | AKR1B10            |
| ENSG00000105929   | 50617            | ATP6V0A4           |
| ENSG00000240268   | 100289017        | MOXD2P             |
| ENSG00000211745   | NA               | NA                 |
| ENSG00000205542   | 7114             | TMSB4X             |
| ENSG00000147003   | 57393            | CLTRN              |
| ENSG00000177324   | 139105           | BEND2              |
| ENSG00000047597   | 7504             | XK                 |
| ENSG00000189221   | 4128             | MAOA               |
| ENSG00000147113   | 79742            | CXorf36            |
| ENSG00000102265   | 7076             | TIMP1              |
| ENSG00000102053   | 340554           | ZC3H12B            |
| ENSG00000230629   | NA               | NA                 |
| ENSG00000229807   | 7503             | XIST               |
| ENSG00000225470   | 554203           | JPX                |
| ENSG00000131171   | 6451             | SH3BGRL            |
| ENSG00000198932   | 9737             | GPRASP1            |
| ENSG00000260831   | NA               | NA                 |
| ENSG00000133131   | 79710            | MORC4              |
| ENSG00000101842   | 340547           | VSIG1              |
| ENSG00000131724   | 3597             | IL13RA1            |
| ENSG00000125676   | 57187            | THOC2              |
| ENSG00000134590   | 8933             | RTL8C              |
| ENSG00000104635   | 23516            | SLC39A14           |
| ENSG00000255101   | NA               | NA                 |

| <b>Ensembl ID</b> | <b>Entrez ID</b> | <b>Gene Symbol</b> |
|-------------------|------------------|--------------------|
| ENSG00000147485   | 137902           | PXDNL              |
| ENSG00000254006   | NA               | NA                 |
| ENSG00000169085   | 254778           | C8orf46            |
| ENSG00000245910   | 641638           | SNHG6              |
| ENSG00000040341   | 27067            | STAU2              |
| ENSG00000104435   | 11075            | STMN2              |
| ENSG00000176623   | 51115            | RMDN1              |
| ENSG00000254219   | NA               | NA                 |
| ENSG00000169439   | 6383             | SDC2               |
| ENSG00000132561   | 4147             | MATN2              |
| ENSG00000156482   | 6156             | RPL30              |
| ENSG00000154188   | 284              | ANGPT1             |
| ENSG00000255080   | NA               | NA                 |
| ENSG00000249816   | 157381           | LINC00964          |
| ENSG00000153310   | 51571            | FAM49B             |
| ENSG00000107020   | 55848            | PLGRKT             |
| ENSG00000107165   | 7306             | TYRP1              |
| ENSG00000107186   | 8777             | MPDZ               |
| ENSG00000044459   | 54875            | CNTLN              |
| ENSG00000230453   | 441459           | ANKRD18B           |
| ENSG00000225937   | 50652            | PCA3               |
| ENSG00000165119   | 3190             | HNRNPK             |
| ENSG00000235819   | NA               | NA                 |
| ENSG00000185963   | 23299            | BICD2              |
| ENSG00000131669   | 4814             | NINJ1              |
| ENSG00000130956   | 22927            | HABP4              |
| ENSG00000270332   | 101928550        | SMC2-AS1           |
| ENSG00000119411   | 54836            | BSPRY              |
| ENSG00000106780   | 1955             | MEGF9              |
| ENSG00000136942   | 11224            | RPL35              |
| ENSG00000136935   | 2800             | GOLGA1             |
| ENSG00000148358   | 57720            | GPR107             |
| ENSG00000165699   | 7248             | TSC1               |
| ENSG00000235106   | 266655           | BRD3OS             |
| ENSG00000122140   | 51116            | MRPS2              |
| ENSG00000184925   | 286256           | LCN12              |
| ENSG00000231298   | 100216001        | MANCR              |
| ENSG00000078114   | 10529            | NEBL               |
| ENSG00000229932   | NA               | NA                 |
| ENSG00000120549   | 56243            | KIAA1217           |
| ENSG00000151033   | 119180           | LYZL2              |
| ENSG00000170759   | 3799             | KIF5B              |

| <b>Ensembl ID</b> | <b>Entrez ID</b> | <b>Gene Symbol</b> |
|-------------------|------------------|--------------------|
| ENSG00000150093   | 3688             | ITGB1              |
| ENSG00000165633   | 196740           | VSTM4              |
| ENSG00000166224   | 8879             | SGPL1              |
| ENSG00000165338   | 143279           | HECTD2             |
| ENSG00000108239   | 23232            | TBC1D12            |
| ENSG00000203867   | 282996           | RBM20              |
| ENSG00000108061   | 8036             | SHOC2              |
| ENSG00000148908   | 6001             | RGS10              |
| ENSG00000176769   | 256536           | TCERG1L            |
| ENSG00000051009   | 84067            | FAM160A2           |
| ENSG00000110169   | 3263             | HPX                |
| ENSG00000183378   | 341277           | OVCH2              |
| ENSG00000244398   | NA               | NA                 |
| ENSG00000166833   | 89797            | NAV2               |
| ENSG00000247151   | 338739           | CSTF3-DT           |
| ENSG00000135374   | 2001             | ELF5               |
| ENSG00000175274   | 9537             | TP53I11            |
| ENSG00000066336   | 6688             | SPI1               |
| ENSG00000255197   | NA               | NA                 |
| ENSG00000149115   | 85456            | TNKS1BP1           |
| ENSG00000213593   | 51075            | TMX2               |
| ENSG00000134827   | 6947             | TCN1               |
| ENSG00000149534   | 2206             | MS4A2              |
| ENSG00000254952   | NA               | NA                 |
| ENSG00000110079   | 51338            | MS4A4A             |
| ENSG00000124942   | 79026            | AHNAK              |
| ENSG00000162191   | 51035            | UBXN1              |
| ENSG00000110047   | 10938            | EHD1               |
| ENSG00000168070   | 283129           | MAJIN              |
| ENSG00000175550   | 10589            | DRAP1              |
| ENSG00000213402   | 5790             | PTPRCAP            |
| ENSG00000069482   | 51083            | GAL                |
| ENSG00000255980   | NA               | NA                 |
| ENSG00000131626   | 8500             | PPFIA1             |
| ENSG00000110237   | 9828             | ARHGEF17           |
| ENSG00000215504   | NA               | NA                 |
| ENSG00000204403   | 100506742        | CASP12             |
| ENSG00000137752   | 834              | CASP1              |
| ENSG00000166736   | 3359             | HTR3A              |
| ENSG00000177103   | 57453            | DSCAML1            |
| ENSG00000110324   | 3587             | IL10RA             |
| ENSG00000095139   | 372              | ARCN1              |

| <b>Ensembl ID</b> | <b>Entrez ID</b> | <b>Gene Symbol</b> |
|-------------------|------------------|--------------------|
| ENSG00000149564   | 90952            | ESAM               |
| ENSG00000254612   | NA               | NA                 |
| ENSG00000084234   | 334              | APLP2              |
| ENSG00000149418   | 6768             | ST14               |
| ENSG00000183715   | 4978             | OPCML              |
| ENSG00000177406   | 100049716        | LOC100049716       |
| ENSG00000118971   | 894              | CCND2              |
| ENSG00000237248   | 100499405        | LINC00987          |
| ENSG00000256660   | 387837           | CLEC12B            |
| ENSG00000139151   | 89869            | PLCZ1              |
| ENSG00000123095   | 79365            | BHLHE41            |
| ENSG00000064115   | 51768            | TM7SF3             |
| ENSG00000110841   | 8496             | PPFIBP1            |
| ENSG00000257176   | 100506606        | LOC100506606       |
| ENSG00000079337   | 10411            | RAPGEF3            |
| ENSG00000050438   | 9498             | SLC4A8             |
| ENSG00000123358   | 3164             | NR4A1              |
| ENSG00000135486   | 3178             | HNRNPA1            |
| ENSG00000111481   | 22818            | COPZ1              |
| ENSG00000065361   | 2065             | ERBB3              |
| ENSG00000196531   | 4666             | NACA               |
| ENSG00000166987   | 114785           | MBD6               |
| ENSG00000213352   | NA               | NA                 |
| ENSG00000156076   | 11197            | WIF1               |
| ENSG00000187109   | 4673             | NAP1L1             |
| ENSG00000257345   | NA               | NA                 |
| ENSG00000139344   | 144193           | AMDHD1             |
| ENSG00000075089   | 64431            | ACTR6              |
| ENSG00000196091   | 4604             | MYBPC1             |
| ENSG00000166598   | 7184             | HSP90B1            |
| ENSG00000111199   | 59341            | TRPV4              |
| ENSG00000135111   | 6926             | TBX3               |
| ENSG00000111412   | 79794            | C12orf49           |
| ENSG00000157837   | 121665           | SPPL3              |
| ENSG00000206192   | NA               | NA                 |
| ENSG00000132964   | 1024             | CDK8               |
| ENSG00000133083   | 9201             | DCLK1              |
| ENSG00000133103   | 57511            | COG6               |
| ENSG00000120658   | 55068            | ENOX1              |
| ENSG00000136110   | 11061            | CNMD               |
| ENSG00000187498   | 1282             | COL4A1             |
| ENSG00000088448   | 55608            | ANKRD10            |

| <b>Ensembl ID</b> | <b>Entrez ID</b> | <b>Gene Symbol</b> |
|-------------------|------------------|--------------------|
| ENSG00000130177   | 8881             | CDC16              |
| ENSG00000129566   | 7011             | TEP1               |
| ENSG00000211786   | NA               | NA                 |
| ENSG00000100439   | 63874            | ABHD4              |
| ENSG00000092067   | 1053             | CEBPE              |
| ENSG00000129473   | 599              | BCL2L2             |
| ENSG00000258643   | 100529063        | BCL2L2-PABPN1      |
| ENSG00000129515   | 58533            | SNX6               |
| ENSG00000119688   | 5826             | ABCD4              |
| ENSG00000119684   | 27030            | MLH3               |
| ENSG00000170345   | 2353             | FOS                |
| ENSG00000089916   | 55668            | GPATCH2L           |
| ENSG00000258819   | 102724190        | LINC02289          |
| ENSG00000021645   | 9369             | NRXN3              |
| ENSG00000211896   | NA               | NA                 |
| ENSG00000211955   | NA               | NA                 |
| ENSG00000225698   | NA               | NA                 |
| ENSG00000215252   | 440270           | GOLGA8B            |
| ENSG00000104081   | 90427            | BMF                |
| ENSG00000166145   | 6692             | SPINT1             |
| ENSG00000104147   | 11339            | OIP5               |
| ENSG00000067369   | 7158             | TP53BP1            |
| ENSG00000137857   | 53905            | DUOX1              |
| ENSG00000157456   | 9133             | CCNB2              |
| ENSG00000137818   | 6176             | RPLP1              |
| ENSG00000187806   | 338949           | TMEM202            |
| ENSG00000167202   | 23102            | TBC1D2B            |
| ENSG00000185787   | 10933            | MORF4L1            |
| ENSG00000058335   | 5923             | RASGRF1            |
| ENSG00000172183   | 3669             | ISG20              |
| ENSG00000140545   | 4240             | MFGE8              |
| ENSG00000140526   | 11057            | ABHD2              |
| ENSG00000185033   | 10509            | SEMA4B             |
| ENSG00000176463   | 28232            | SLCO3A1            |
| ENSG00000007541   | 9091             | PIGQ               |
| ENSG00000260260   | 100507303        | SNHG19             |
| ENSG00000008517   | 9235             | IL32               |
| ENSG00000140623   | 124404           | SEPT12             |
| ENSG00000262097   | 101927311        | LINC02185          |
| ENSG00000087253   | 54947            | LPCAT2             |
| ENSG00000159708   | 55282            | LRRC36             |
| ENSG00000124067   | 6560             | SLC12A4            |

| <b>Ensembl ID</b> | <b>Entrez ID</b> | <b>Gene Symbol</b> |
|-------------------|------------------|--------------------|
| ENSG00000182810   | 55794            | DDX28              |
| ENSG00000214353   | 100130894        | VAC14-AS1          |
| ENSG00000166816   | 197257           | LDHD               |
| ENSG00000135697   | 53630            | BCO1               |
| ENSG00000103196   | 83716            | CRISPLD2           |
| ENSG00000197912   | 6687             | SPG7               |
| ENSG00000141503   | 50488            | MINK1              |
| ENSG00000181885   | 1366             | CLDN7              |
| ENSG00000170315   | 7314             | UBB                |
| ENSG00000072210   | 224              | ALDH3A2            |
| ENSG00000128487   | 92521            | SPECC1             |
| ENSG00000226521   | NA               | NA                 |
| ENSG00000267671   | NA               | NA                 |
| ENSG00000161654   | 124801           | LSM12              |
| ENSG00000168591   | 79089            | TMUB2              |
| ENSG00000108821   | 1277             | COL1A1             |
| ENSG00000153930   | 162282           | ANKFN1             |
| ENSG00000062716   | 81671            | VMP1               |
| ENSG00000108506   | 57508            | INTS2              |
| ENSG00000267361   | NA               | NA                 |
| ENSG00000267123   | 101928710        | LINC02081          |
| ENSG00000108679   | 3959             | LGALS3BP           |
| ENSG00000171298   | 2548             | GAA                |
| ENSG00000183010   | 5831             | PYCR1              |
| ENSG00000132874   | 8170             | SLC14A2            |
| ENSG00000167306   | 4645             | MYO5B              |
| ENSG00000267013   | 101927229        | LINC01929          |
| ENSG00000267390   | NA               | NA                 |
| ENSG00000221887   | 284293           | HMSD               |
| ENSG00000125841   | 80023            | NRSN2              |
| ENSG00000088888   | 57506            | MAVS               |
| ENSG00000101265   | 9770             | RASSF2             |
| ENSG00000125968   | 3397             | ID1                |
| ENSG00000101421   | 128866           | CHMP4B             |
| ENSG00000196756   | 388796           | SNHG17             |
| ENSG00000101076   | 3172             | HNF4A              |
| ENSG00000124145   | 6385             | SDC4               |
| ENSG00000177410   | 441951           | ZFAS1              |
| ENSG00000232442   | 100505771        | MHENCRC            |
| ENSG00000203880   | 55251            | PCMTD2             |
| ENSG00000197561   | 1991             | ELANE              |
| ENSG00000130270   | 148229           | ATP8B3             |

| <b>Ensembl ID</b> | <b>Entrez ID</b> | <b>Gene Symbol</b> |
|-------------------|------------------|--------------------|
| ENSG00000179855   | 126326           | GIPC3              |
| ENSG00000105278   | 23217            | ZFR2               |
| ENSG00000197256   | 25959            | KANK2              |
| ENSG00000105518   | 374882           | TMEM205            |
| ENSG00000198429   | 7620             | ZNF69              |
| ENSG00000074181   | 4854             | NOTCH3             |
| ENSG00000130520   | 25804            | LSM4               |
| ENSG00000256229   | 90649            | ZNF486             |
| ENSG00000105707   | 3249             | HPN                |
| ENSG00000181666   | 284459           | HKR1               |
| ENSG00000167644   | 64073            | C19orf33           |
| ENSG00000128626   | 6183             | MRPS12             |
| ENSG00000105372   | 6223             | RPS19              |
| ENSG00000187244   | 4059             | BCAM               |
| ENSG00000125740   | 2354             | FOSB               |
| ENSG00000090372   | 29888            | STRN4              |
| ENSG00000118156   | 84215            | ZNF541             |
| ENSG00000105398   | 6822             | SULT2A1            |
| ENSG00000063177   | 6141             | RPL18              |
| ENSG00000104951   | 259307           | IL411              |
| ENSG00000171049   | 2358             | FPR2               |
| ENSG00000189068   | 284415           | VSTM1              |
| ENSG00000248385   | 441864           | TARM1              |
| ENSG00000189013   | 3805             | KIR2DL4            |
| ENSG00000108107   | 6158             | RPL28              |
| ENSG00000268205   | NA               | NA                 |
| ENSG00000129824   | 6192             | RPS4Y1             |
| ENSG00000154620   | 9087             | TMSB4Y             |
| ENSG00000215580   | 286554           | BCORP1             |
| ENSG00000131100   | 529              | ATP6V1E1           |
| ENSG00000099889   | 421              | ARVCF              |
| ENSG00000099901   | 5902             | RANBP1             |
| ENSG00000161133   | 373856           | USP41              |
| ENSG00000223553   | NA               | NA                 |
| ENSG00000224144   | NA               | NA                 |
| ENSG00000099998   | 2687             | GGT5               |
| ENSG00000226471   | NA               | NA                 |
| ENSG00000133488   | 284904           | SEC14L4            |
| ENSG00000128311   | 7263             | TST                |
| ENSG00000100092   | 23616            | SH3BP1             |
| ENSG00000100206   | 11144            | DMC1               |
| ENSG00000100316   | 6122             | RPL3               |

| <b>Ensembl ID</b> | <b>Entrez ID</b> | <b>Gene Symbol</b> |
|-------------------|------------------|--------------------|
| ENSG00000100416   | 55687            | TRMU               |
| ENSG00000154654   | 4685             | NCAM2              |
| ENSG00000142192   | 351              | APP                |
| ENSG00000237945   | 100506334        | LINC00649          |
| ENSG00000185917   | 54093            | SETD4              |
| ENSG00000177398   | 89766            | UMODL1             |
| ENSG00000160207   | 11077            | HSF2BP             |



**Table S5. Predicted probabilities for multiclass classification.**

| Training Set (LOOCV)      |                              |                               |                    |            | Internal validation set              |                              |                               |                    |            |
|---------------------------|------------------------------|-------------------------------|--------------------|------------|--------------------------------------|------------------------------|-------------------------------|--------------------|------------|
| Training set sample index | Probability of normal sample | Probability of benign disease | Probability of CRC | True label | Internal validation set sample index | Probability of normal sample | Probability of benign disease | Probability of CRC | True label |
| 1                         | 0.007                        | 0.287                         | 0.706              | Malignant  | 1                                    | 0.046                        | 0.052                         | 0.902              | Malignant  |
| 2                         | 0.004                        | 0.831                         | 0.164              | Benign     | 2                                    | 0.006                        | 0.908                         | 0.086              | Benign     |
| 3                         | 0.004                        | 0.039                         | 0.957              | Malignant  | 3                                    | 0.013                        | 0.186                         | 0.801              | Malignant  |
| 4                         | 0.031                        | 0.136                         | 0.833              | Benign     | 4                                    | 0.014                        | 0.841                         | 0.146              | Benign     |
| 5                         | 0.081                        | 0.432                         | 0.487              | Benign     | 5                                    | 0.053                        | 0.573                         | 0.374              | Benign     |
| 6                         | 0.017                        | 0.826                         | 0.158              | Benign     | 6                                    | 0.013                        | 0.462                         | 0.525              | Benign     |
| 7                         | 0.034                        | 0.567                         | 0.400              | Malignant  | 7                                    | 0.016                        | 0.331                         | 0.653              | Malignant  |
| 8                         | 0.027                        | 0.602                         | 0.371              | Benign     | 8                                    | 0.003                        | 0.735                         | 0.262              | Benign     |
| 9                         | 0.017                        | 0.341                         | 0.642              | Benign     | 9                                    | 0.004                        | 0.803                         | 0.193              | Benign     |
| 10                        | 0.028                        | 0.385                         | 0.587              | Benign     | 10                                   | 0.013                        | 0.450                         | 0.537              | Malignant  |
| 11                        | 0.014                        | 0.488                         | 0.498              | Benign     | 11                                   | 0.022                        | 0.503                         | 0.475              | Benign     |
| 12                        | 0.031                        | 0.845                         | 0.124              | Benign     | 12                                   | 0.022                        | 0.254                         | 0.724              | Malignant  |
| 13                        | 0.004                        | 0.850                         | 0.146              | Benign     | 13                                   | 0.007                        | 0.574                         | 0.419              | Benign     |
| 14                        | 0.014                        | 0.005                         | 0.981              | Malignant  | 14                                   | 0.021                        | 0.316                         | 0.663              | Malignant  |
| 15                        | 0.004                        | 0.834                         | 0.162              | Benign     | 15                                   | 0.021                        | 0.525                         | 0.454              | Benign     |
| 16                        | 0.009                        | 0.913                         | 0.078              | Benign     | 16                                   | 0.017                        | 0.032                         | 0.951              | Malignant  |
| 17                        | 0.007                        | 0.954                         | 0.039              | Benign     | 17                                   | 0.008                        | 0.400                         | 0.592              | Benign     |
| 18                        | 0.032                        | 0.777                         | 0.191              | Benign     | 18                                   | 0.006                        | 0.652                         | 0.342              | Malignant  |
| 19                        | 0.047                        | 0.797                         | 0.156              | Normal     | 19                                   | 0.026                        | 0.675                         | 0.299              | Benign     |
| 20                        | 0.041                        | 0.702                         | 0.257              | Normal     | 20                                   | 0.029                        | 0.465                         | 0.505              | Benign     |
| 21                        | 0.010                        | 0.944                         | 0.046              | Benign     | 21                                   | 0.004                        | 0.902                         | 0.094              | Benign     |
| 22                        | 0.016                        | 0.936                         | 0.048              | Benign     | 22                                   | 0.010                        | 0.382                         | 0.608              | Benign     |
| 23                        | 0.024                        | 0.614                         | 0.363              | Benign     | 23                                   | 0.029                        | 0.159                         | 0.812              | Malignant  |
| 24                        | 0.028                        | 0.953                         | 0.019              | Benign     | 24                                   | 0.010                        | 0.477                         | 0.513              | Malignant  |
| 25                        | 0.033                        | 0.945                         | 0.022              | Benign     | 25                                   | 0.003                        | 0.425                         | 0.572              | Malignant  |
| 26                        | 0.042                        | 0.837                         | 0.121              | Benign     | 26                                   | 0.006                        | 0.402                         | 0.592              | Benign     |
| 27                        | 0.012                        | 0.948                         | 0.040              | Benign     | 27                                   | 0.005                        | 0.001                         | 0.994              | Malignant  |
| 28                        | 0.008                        | 0.969                         | 0.023              | Benign     | 28                                   | 0.018                        | 0.127                         | 0.855              | Malignant  |
| 29                        | 0.023                        | 0.915                         | 0.063              | Benign     | 29                                   | 0.006                        | 0.939                         | 0.055              | Benign     |
| 30                        | 0.017                        | 0.822                         | 0.161              | Benign     | 30                                   | 0.004                        | 0.965                         | 0.031              | Benign     |
| 31                        | 0.045                        | 0.470                         | 0.484              | Benign     | 31                                   | 0.079                        | 0.020                         | 0.901              | Malignant  |
| 32                        | 0.004                        | 0.939                         | 0.057              | Benign     | 32                                   | 0.004                        | 0.954                         | 0.042              | Benign     |
| 33                        | 0.020                        | 0.591                         | 0.389              | Benign     | 33                                   | 0.004                        | 0.012                         | 0.984              | Malignant  |
| 34                        | 0.012                        | 0.952                         | 0.037              | Benign     | 34                                   | 0.018                        | 0.841                         | 0.141              | Malignant  |
| 35                        | 0.033                        | 0.541                         | 0.427              | Malignant  | 35                                   | 0.011                        | 0.592                         | 0.397              | Benign     |
| 36                        | 0.014                        | 0.674                         | 0.312              | Benign     | 36                                   | 0.004                        | 0.602                         | 0.394              | Benign     |

| Training Set (LOOCV) |       |       |       |           | Internal validation set |       |       |       |           |
|----------------------|-------|-------|-------|-----------|-------------------------|-------|-------|-------|-----------|
| 37                   | 0.009 | 0.782 | 0.209 | Benign    | 37                      | 0.005 | 0.550 | 0.445 | Malignant |
| 38                   | 0.011 | 0.868 | 0.120 | Benign    | 38                      | 0.007 | 0.868 | 0.125 | Benign    |
| 39                   | 0.004 | 0.973 | 0.023 | Benign    | 39                      | 0.019 | 0.594 | 0.387 | Benign    |
| 40                   | 0.036 | 0.840 | 0.124 | Benign    | 40                      | 0.017 | 0.652 | 0.331 | Benign    |
| 41                   | 0.012 | 0.176 | 0.812 | Benign    | 41                      | 0.005 | 0.951 | 0.044 | Benign    |
| 42                   | 0.021 | 0.129 | 0.851 | Malignant | 42                      | 0.014 | 0.066 | 0.921 | Malignant |
| 43                   | 0.009 | 0.528 | 0.463 | Benign    | 43                      | 0.028 | 0.097 | 0.875 | Malignant |
| 44                   | 0.013 | 0.016 | 0.971 | Malignant | 44                      | 0.006 | 0.073 | 0.921 | Malignant |
| 45                   | 0.036 | 0.610 | 0.354 | Benign    | 45                      | 0.014 | 0.904 | 0.082 | Benign    |
| 46                   | 0.014 | 0.056 | 0.930 | Malignant | 46                      | 0.015 | 0.012 | 0.973 | Malignant |
| 47                   | 0.006 | 0.940 | 0.054 | Benign    | 47                      | 0.029 | 0.283 | 0.688 | Benign    |
| 48                   | 0.027 | 0.296 | 0.677 | Malignant | 48                      | 0.030 | 0.538 | 0.433 | Benign    |
| 49                   | 0.058 | 0.457 | 0.484 | Malignant | 49                      | 0.005 | 0.002 | 0.993 | Malignant |
| 50                   | 0.103 | 0.349 | 0.548 | Malignant | 50                      | 0.027 | 0.543 | 0.430 | Malignant |
| 51                   | 0.085 | 0.812 | 0.104 | Benign    | 51                      | 0.018 | 0.485 | 0.497 | Benign    |
| 52                   | 0.022 | 0.817 | 0.161 | Benign    | 52                      | 0.094 | 0.232 | 0.675 | Benign    |
| 53                   | 0.024 | 0.330 | 0.645 | Benign    | 53                      | 0.008 | 0.944 | 0.048 | Benign    |
| 54                   | 0.011 | 0.941 | 0.048 | Benign    | 54                      | 0.022 | 0.939 | 0.039 | Benign    |
| 55                   | 0.020 | 0.566 | 0.414 | Benign    | 55                      | 0.016 | 0.930 | 0.053 | Benign    |
| 56                   | 0.017 | 0.284 | 0.699 | Malignant | 56                      | 0.032 | 0.065 | 0.903 | Malignant |
| 57                   | 0.019 | 0.704 | 0.277 | Benign    | 57                      | 0.011 | 0.174 | 0.815 | Benign    |
| 58                   | 0.008 | 0.697 | 0.296 | Benign    | 58                      | 0.011 | 0.905 | 0.083 | Benign    |
| 59                   | 0.005 | 0.974 | 0.021 | Benign    | 59                      | 0.025 | 0.491 | 0.484 | Benign    |
| 60                   | 0.010 | 0.017 | 0.973 | Malignant | 60                      | 0.007 | 0.750 | 0.243 | Benign    |
| 61                   | 0.005 | 0.228 | 0.767 | Malignant | 61                      | 0.006 | 0.117 | 0.877 | Malignant |
| 62                   | 0.016 | 0.728 | 0.257 | Benign    | 62                      | 0.033 | 0.436 | 0.531 | Malignant |
| 63                   | 0.028 | 0.174 | 0.798 | Benign    | 63                      | 0.006 | 0.975 | 0.019 | Benign    |
| 64                   | 0.025 | 0.458 | 0.517 | Malignant | 64                      | 0.044 | 0.162 | 0.794 | Malignant |
| 65                   | 0.025 | 0.430 | 0.545 | Malignant | 65                      | 0.016 | 0.337 | 0.647 | Benign    |
| 66                   | 0.006 | 0.249 | 0.745 | Malignant | 66                      | 0.020 | 0.239 | 0.741 | Malignant |
| 67                   | 0.004 | 0.681 | 0.315 | Benign    | 67                      | 0.012 | 0.077 | 0.911 | Malignant |
| 68                   | 0.028 | 0.093 | 0.879 | Malignant | 68                      | 0.010 | 0.207 | 0.782 | Malignant |
| 69                   | 0.005 | 0.498 | 0.497 | Malignant | 69                      | 0.128 | 0.151 | 0.721 | Benign    |
| 70                   | 0.020 | 0.100 | 0.880 | Malignant | 70                      | 0.037 | 0.384 | 0.578 | Benign    |
| 71                   | 0.018 | 0.015 | 0.967 | Malignant | 71                      | 0.002 | 0.711 | 0.287 | Malignant |
| 72                   | 0.028 | 0.671 | 0.301 | Benign    | 72                      | 0.002 | 0.824 | 0.174 | Benign    |
| 73                   | 0.009 | 0.105 | 0.886 | Malignant | 73                      | 0.025 | 0.329 | 0.647 | Benign    |
| 74                   | 0.023 | 0.262 | 0.716 | Malignant | 74                      | 0.034 | 0.110 | 0.857 | Malignant |
| 75                   | 0.007 | 0.240 | 0.753 | Malignant | 75                      | 0.022 | 0.643 | 0.335 | Benign    |
| 76                   | 0.013 | 0.330 | 0.657 | Malignant | 76                      | 0.019 | 0.249 | 0.732 | Benign    |
| 77                   | 0.010 | 0.802 | 0.189 | Benign    | 77                      | 0.033 | 0.434 | 0.532 | Malignant |

| Training Set (LOOCV) |       |       |       |           | Internal validation set |       |       |       |           |
|----------------------|-------|-------|-------|-----------|-------------------------|-------|-------|-------|-----------|
| 78                   | 0.024 | 0.362 | 0.614 | Benign    | 78                      | 0.026 | 0.261 | 0.713 | Malignant |
| 79                   | 0.007 | 0.864 | 0.129 | Benign    | 79                      | 0.003 | 0.910 | 0.088 | Benign    |
| 80                   | 0.003 | 0.972 | 0.026 | Benign    | 80                      | 0.988 | 0.003 | 0.009 | Normal    |
| 81                   | 0.025 | 0.128 | 0.848 | Malignant | 81                      | 0.018 | 0.081 | 0.901 | Malignant |
| 82                   | 0.024 | 0.352 | 0.624 | Malignant | 82                      | 0.003 | 0.970 | 0.027 | Benign    |
| 83                   | 0.005 | 0.335 | 0.660 | Malignant | 83                      | 0.022 | 0.224 | 0.754 | Malignant |
| 84                   | 0.008 | 0.976 | 0.016 | Benign    | 84                      | 0.018 | 0.746 | 0.235 | Benign    |
| 85                   | 0.016 | 0.084 | 0.900 | Malignant | 85                      | 0.021 | 0.469 | 0.510 | Benign    |
| 86                   | 0.031 | 0.759 | 0.210 | Benign    | 86                      | 0.010 | 0.835 | 0.155 | Malignant |
| 87                   | 0.009 | 0.078 | 0.913 | Malignant | 87                      | 0.899 | 0.042 | 0.060 | Normal    |
| 88                   | 0.006 | 0.931 | 0.063 | Benign    | 88                      | 0.023 | 0.399 | 0.578 | Malignant |
| 89                   | 0.017 | 0.376 | 0.607 | Malignant | 89                      | 0.013 | 0.623 | 0.365 | Benign    |
| 90                   | 0.009 | 0.753 | 0.238 | Malignant | 90                      | 0.065 | 0.799 | 0.136 | Normal    |
| 91                   | 0.012 | 0.198 | 0.790 | Malignant | 91                      | 0.018 | 0.269 | 0.713 | Malignant |
| 92                   | 0.015 | 0.574 | 0.412 | Benign    | 92                      | 0.033 | 0.307 | 0.661 | Malignant |
| 93                   | 0.048 | 0.470 | 0.482 | Malignant | 93                      | 0.016 | 0.041 | 0.943 | Malignant |
| 94                   | 0.020 | 0.028 | 0.952 | Malignant | 94                      | 0.009 | 0.931 | 0.060 | Benign    |
| 95                   | 0.036 | 0.276 | 0.689 | Malignant | 95                      | 0.035 | 0.027 | 0.938 | Malignant |
| 96                   | 0.023 | 0.216 | 0.761 | Malignant | 96                      | 0.029 | 0.365 | 0.606 | Benign    |
| 97                   | 0.010 | 0.753 | 0.237 | Benign    | 97                      | 0.022 | 0.851 | 0.127 | Benign    |
| 98                   | 0.014 | 0.743 | 0.243 | Benign    | 98                      | 0.024 | 0.006 | 0.971 | Malignant |
| 99                   | 0.069 | 0.080 | 0.851 | Malignant | 99                      | 0.076 | 0.715 | 0.209 | Benign    |
| 100                  | 0.023 | 0.558 | 0.419 | Benign    | 100                     | 0.024 | 0.249 | 0.727 | Malignant |
| 101                  | 0.003 | 0.909 | 0.088 | Benign    | 101                     | 0.003 | 0.984 | 0.012 | Benign    |
| 102                  | 0.020 | 0.399 | 0.580 | Benign    | 102                     | 0.004 | 0.873 | 0.123 | Malignant |
| 103                  | 0.004 | 0.898 | 0.098 | Benign    | 103                     | 0.014 | 0.748 | 0.237 | Benign    |
| 104                  | 0.008 | 0.925 | 0.068 | Benign    | 104                     | 0.003 | 0.937 | 0.060 | Benign    |
| 105                  | 0.010 | 0.331 | 0.659 | Malignant | 105                     | 0.025 | 0.018 | 0.957 | Malignant |
| 106                  | 0.019 | 0.865 | 0.116 | Benign    | 106                     | 0.016 | 0.729 | 0.255 | Benign    |
| 107                  | 0.005 | 0.807 | 0.188 | Benign    | 107                     | 0.809 | 0.101 | 0.090 | Normal    |
| 108                  | 0.007 | 0.281 | 0.712 | Malignant | 108                     | 0.027 | 0.097 | 0.876 | Malignant |
| 109                  | 0.012 | 0.526 | 0.461 | Malignant | 109                     | 0.035 | 0.113 | 0.852 | Benign    |
| 110                  | 0.005 | 0.916 | 0.079 | Benign    | 110                     | 0.038 | 0.238 | 0.725 | Malignant |
| 111                  | 0.021 | 0.677 | 0.302 | Benign    | 111                     | 0.024 | 0.340 | 0.636 | Benign    |
| 112                  | 0.006 | 0.145 | 0.849 | Malignant | 112                     | 0.024 | 0.448 | 0.528 | Benign    |
| 113                  | 0.008 | 0.854 | 0.138 | Benign    | 113                     | 0.023 | 0.541 | 0.436 | Benign    |
| 114                  | 0.018 | 0.365 | 0.617 | Malignant | 114                     | 0.015 | 0.804 | 0.181 | Benign    |
| 115                  | 0.019 | 0.942 | 0.039 | Benign    | 115                     | 0.025 | 0.245 | 0.730 | Malignant |
| 116                  | 0.022 | 0.211 | 0.767 | Malignant | 116                     | 0.003 | 0.934 | 0.063 | Malignant |
| 117                  | 0.003 | 0.974 | 0.023 | Benign    | 117                     | 0.015 | 0.695 | 0.290 | Benign    |
| 118                  | 0.007 | 0.779 | 0.215 | Benign    | 118                     | 0.024 | 0.331 | 0.645 | Benign    |

| Training Set (LOOCV) |       |       |       |           | Internal validation set |       |       |       |           |
|----------------------|-------|-------|-------|-----------|-------------------------|-------|-------|-------|-----------|
| 119                  | 0.012 | 0.798 | 0.191 | Malignant | 119                     | 0.025 | 0.139 | 0.836 | Malignant |
| 120                  | 0.019 | 0.698 | 0.283 | Malignant | 120                     | 0.010 | 0.234 | 0.756 | Malignant |
| 121                  | 0.018 | 0.811 | 0.171 | Benign    |                         |       |       |       |           |
| 122                  | 0.018 | 0.454 | 0.527 | Normal    |                         |       |       |       |           |
| 123                  | 0.014 | 0.670 | 0.316 | Malignant |                         |       |       |       |           |
| 124                  | 0.004 | 0.028 | 0.968 | Malignant |                         |       |       |       |           |
| 125                  | 0.023 | 0.100 | 0.877 | Malignant |                         |       |       |       |           |
| 126                  | 0.011 | 0.554 | 0.435 | Benign    |                         |       |       |       |           |
| 127                  | 0.003 | 0.920 | 0.077 | Benign    |                         |       |       |       |           |
| 128                  | 0.023 | 0.079 | 0.898 | Malignant |                         |       |       |       |           |
| 129                  | 0.019 | 0.676 | 0.305 | Benign    |                         |       |       |       |           |
| 130                  | 0.008 | 0.946 | 0.046 | Benign    |                         |       |       |       |           |
| 131                  | 0.003 | 0.794 | 0.203 | Benign    |                         |       |       |       |           |
| 132                  | 0.008 | 0.745 | 0.247 | Malignant |                         |       |       |       |           |
| 133                  | 0.006 | 0.474 | 0.519 | Benign    |                         |       |       |       |           |
| 134                  | 0.004 | 0.937 | 0.059 | Benign    |                         |       |       |       |           |
| 135                  | 0.004 | 0.916 | 0.081 | Malignant |                         |       |       |       |           |
| 136                  | 0.044 | 0.266 | 0.690 | Malignant |                         |       |       |       |           |
| 137                  | 0.013 | 0.330 | 0.657 | Malignant |                         |       |       |       |           |
| 138                  | 0.077 | 0.271 | 0.653 | Malignant |                         |       |       |       |           |
| 139                  | 0.004 | 0.955 | 0.041 | Benign    |                         |       |       |       |           |
| 140                  | 0.005 | 0.612 | 0.383 | Malignant |                         |       |       |       |           |
| 141                  | 0.006 | 0.265 | 0.729 | Malignant |                         |       |       |       |           |
| 142                  | 0.074 | 0.877 | 0.050 | Benign    |                         |       |       |       |           |
| 143                  | 0.013 | 0.007 | 0.981 | Malignant |                         |       |       |       |           |
| 144                  | 0.021 | 0.852 | 0.127 | Benign    |                         |       |       |       |           |
| 145                  | 0.014 | 0.900 | 0.086 | Benign    |                         |       |       |       |           |
| 146                  | 0.054 | 0.597 | 0.349 | Benign    |                         |       |       |       |           |
| 147                  | 0.011 | 0.586 | 0.403 | Benign    |                         |       |       |       |           |
| 148                  | 0.038 | 0.800 | 0.162 | Benign    |                         |       |       |       |           |
| 149                  | 0.013 | 0.101 | 0.886 | Malignant |                         |       |       |       |           |
| 150                  | 0.023 | 0.089 | 0.888 | Malignant |                         |       |       |       |           |
| 151                  | 0.028 | 0.295 | 0.676 | Malignant |                         |       |       |       |           |
| 152                  | 0.012 | 0.759 | 0.229 | Benign    |                         |       |       |       |           |
| 153                  | 0.022 | 0.693 | 0.285 | Benign    |                         |       |       |       |           |
| 154                  | 0.029 | 0.934 | 0.036 | Benign    |                         |       |       |       |           |
| 155                  | 0.022 | 0.397 | 0.580 | Benign    |                         |       |       |       |           |
| 156                  | 0.030 | 0.528 | 0.442 | Malignant |                         |       |       |       |           |
| 157                  | 0.018 | 0.933 | 0.049 | Benign    |                         |       |       |       |           |
| 158                  | 0.029 | 0.042 | 0.929 | Benign    |                         |       |       |       |           |
| 159                  | 0.029 | 0.009 | 0.962 | Malignant |                         |       |       |       |           |

| Training Set (LOOCV) |       |       |       |           | Internal validation set |  |  |  |  |
|----------------------|-------|-------|-------|-----------|-------------------------|--|--|--|--|
| 160                  | 0.006 | 0.794 | 0.200 | Benign    |                         |  |  |  |  |
| 161                  | 0.019 | 0.581 | 0.400 | Benign    |                         |  |  |  |  |
| 162                  | 0.038 | 0.314 | 0.648 | Malignant |                         |  |  |  |  |
| 163                  | 0.015 | 0.169 | 0.816 | Benign    |                         |  |  |  |  |
| 164                  | 0.020 | 0.836 | 0.144 | Benign    |                         |  |  |  |  |
| 165                  | 0.022 | 0.861 | 0.117 | Benign    |                         |  |  |  |  |
| 166                  | 0.017 | 0.112 | 0.872 | Malignant |                         |  |  |  |  |
| 167                  | 0.016 | 0.027 | 0.956 | Benign    |                         |  |  |  |  |
| 168                  | 0.011 | 0.682 | 0.308 | Malignant |                         |  |  |  |  |
| 169                  | 0.016 | 0.634 | 0.350 | Malignant |                         |  |  |  |  |
| 170                  | 0.028 | 0.024 | 0.948 | Malignant |                         |  |  |  |  |
| 171                  | 0.023 | 0.457 | 0.521 | Malignant |                         |  |  |  |  |
| 172                  | 0.015 | 0.868 | 0.117 | Benign    |                         |  |  |  |  |
| 173                  | 0.023 | 0.340 | 0.638 | Benign    |                         |  |  |  |  |
| 174                  | 0.011 | 0.175 | 0.814 | Malignant |                         |  |  |  |  |
| 175                  | 0.018 | 0.007 | 0.975 | Malignant |                         |  |  |  |  |
| 176                  | 0.018 | 0.056 | 0.926 | Malignant |                         |  |  |  |  |
| 177                  | 0.963 | 0.016 | 0.022 | Normal    |                         |  |  |  |  |
| 178                  | 0.755 | 0.096 | 0.149 | Normal    |                         |  |  |  |  |
| 179                  | 0.951 | 0.022 | 0.027 | Normal    |                         |  |  |  |  |
| 180                  | 0.769 | 0.126 | 0.106 | Normal    |                         |  |  |  |  |
| 181                  | 0.984 | 0.008 | 0.008 | Normal    |                         |  |  |  |  |
| 182                  | 0.973 | 0.017 | 0.010 | Normal    |                         |  |  |  |  |
| 183                  | 0.965 | 0.022 | 0.013 | Normal    |                         |  |  |  |  |
| 184                  | 0.976 | 0.013 | 0.010 | Normal    |                         |  |  |  |  |
| 185                  | 0.864 | 0.033 | 0.103 | Normal    |                         |  |  |  |  |
| 186                  | 0.970 | 0.012 | 0.018 | Normal    |                         |  |  |  |  |
| 187                  | 0.989 | 0.006 | 0.006 | Normal    |                         |  |  |  |  |
| 188                  | 0.861 | 0.093 | 0.045 | Normal    |                         |  |  |  |  |
| 189                  | 0.955 | 0.020 | 0.026 | Normal    |                         |  |  |  |  |
| 190                  | 0.986 | 0.005 | 0.010 | Normal    |                         |  |  |  |  |
| 191                  | 0.027 | 0.689 | 0.285 | Benign    |                         |  |  |  |  |
| 192                  | 0.014 | 0.874 | 0.112 | Benign    |                         |  |  |  |  |
| 193                  | 0.027 | 0.605 | 0.368 | Malignant |                         |  |  |  |  |
| 194                  | 0.032 | 0.860 | 0.108 | Benign    |                         |  |  |  |  |
| 195                  | 0.017 | 0.520 | 0.463 | Malignant |                         |  |  |  |  |
| 196                  | 0.025 | 0.399 | 0.576 | Malignant |                         |  |  |  |  |
| 197                  | 0.013 | 0.157 | 0.830 | Malignant |                         |  |  |  |  |
| 198                  | 0.019 | 0.397 | 0.585 | Malignant |                         |  |  |  |  |
| 199                  | 0.015 | 0.061 | 0.925 | Malignant |                         |  |  |  |  |
| 200                  | 0.023 | 0.375 | 0.602 | Malignant |                         |  |  |  |  |

| Training Set (LOOCV) |       |       |       |           | Internal validation set |  |  |  |  |
|----------------------|-------|-------|-------|-----------|-------------------------|--|--|--|--|
| 201                  | 0.007 | 0.358 | 0.635 | Malignant |                         |  |  |  |  |
| 202                  | 0.007 | 0.766 | 0.226 | Benign    |                         |  |  |  |  |
